1  
2  
3  
4  
5  
6  
7  
8  
9  
10  
11  
12  
13  
14  
15  
16  
17  
18

## **The genomic landscapes of desert birds are structured by contemporary features**

Authors: Kaiya Provost<sup>1,2,3,\*</sup>, Stephanie Yun Shue<sup>4,5</sup>, Meghan Forcellati<sup>4,6</sup>, Brian Tilston Smith<sup>1</sup>

<sup>1</sup> Department of Ornithology, American Museum of Natural History, New York, New York, USA

<sup>2</sup> Richard Gilder Graduate School, American Museum of Natural History, New York, New York, USA

<sup>3</sup> Evolution, Ecology and Organismal Biology, The Ohio State University, Columbus, Ohio, USA

<sup>4</sup> Bergen County Academies, Hackensack, New Jersey, USA

<sup>5</sup> Biological Sciences, University of California Berkeley, Berkeley, California, USA

<sup>6</sup> Ecology, Evolution, and Environmental Biology, Columbia University, New York, New York, USA

\*Corresponding author: Kaiya L. Provost, [provost.27@osu.edu](mailto:provost.27@osu.edu), Department of Evolution, Ecology and Organismal Biology, The Ohio State University. 318 W. 12th Ave. 300 Aronoff Laboratory Columbus, OH 43210, USA

## 19 **Abstract**

20 Spatial models show that genetic differentiation can be explained by factors ranging from  
21 geographic distance to environmental resistance across the landscape. However, genomes exhibit  
22 a landscape of differentiation, which could indicate that multiple factors better explain divergence  
23 in different portions of the genome. We test whether the best-predictors of intraspecific  
24 differentiation vary across the genome in ten bird species that co-occur in Sonoran and Chihuahuan  
25 deserts. Using population-level genomic data, we characterized the genomic landscapes across  
26 species and modeled five predictors that represented historical and contemporary mechanisms.  
27 The extent of genomic landscapes differed across the ten species, influenced by varying levels of  
28 population structuring and admixture between deserts. General dissimilarity matrix modeling  
29 indicated that the best-fit models differed from the whole genome and partitions along the genome.  
30 The most important predictors of genetic distance were environment and contemporary  
31 demography, which each explained 25–38% of observed variation, with paleoclimate and the  
32 position of the biogeographic barrier explaining 14–16%, and distance only explaining 9%. In  
33 particular, the genome was best explained by the biogeographic barrier in regions where the  
34 genome showed high fixation between populations. Similar levels of heterogeneity were observed  
35 among species and phenotypic divergence within species. These results illustrate that the genomic  
36 landscape of differentiation was influenced by alternative spatial factors operating on different  
37 portions of the genome.

38

## 39 **Introduction**

40 Levels of nucleotide diversity and the degree of differentiation both vary across genomes  
41 (e.g., Ellegren et al., 2012; Li and Ralph 2019). These so-called genomic landscapes are produced  
42 by a range of variable processes including ones intrinsic to the genome (meiotic recombination,  
43 mutation) and those extrinsic (introgression, selection, and drift). Fluctuating levels of genetic  
44 diversity across the genome have been shown to be associated with recombination rate indicating  
45 that linked selection reduces variation (e.g., Thom G, Moreira LR, Batista R, Gehara M, Aleixo  
46 A, Smith BT, unpublished data, <https://www.biorxiv.org/content/10.1101/2021.12.01.470789v1>).  
47 Likewise, speciation genes, mutation rates, and coalescent times are all known to cause variation  
48 in differentiation across the genome (Nosil and Schluter 2011, Benzer 1961; Hodgkinson and Eyre-  
49 Walker 2011). In contrast to intrinsic processes, extrinsic processes are mediated through  
50 interactions with the adaptive and demographic factors operating across space. Despite evidence  
51 of the patterns and processes driving a heterogeneous genomic landscape (e.g., Li and Ralph 2019,  
52 Wang et al., 2020), studies examining the spatial predictors of genetic differentiation often treat  
53 genomic data as homogeneous. Clarifying the relationship between the heterogeneity of the  
54 genomic landscape and spatial predictors of differentiation will elucidate how intraspecific  
55 variation arises in the complex physical landscape.

56 The spatial processes attributed to population differentiation operate over historical  
57 through contemporary time scales. For example, population history is often linked to Pleistocene  
58 glacial cycles that shifted and fragmented distributions over the last 2.6 million years. An  
59 association of genome-wide structuring linked to population fragmentation can be tested under  
60 isolation-by-history (IBH), where genetic distances are modeled against paleo-climatic suitability  
61 (Vasconcellos et al., 2019; Moreira et al., 2020). There are also atemporal manifestations of  
62 historical isolation, such as isolation-by-barrier (IBB; *sensu* Mayr 1942), which posits that  
63 population differentiation is best predicted by a landscape feature, for example a mountain range  
64 or river. Over shallower evolutionary scales, non-random mating with individuals in closer

65 geographic proximity can cause genetic differentiation. Geographic distances alone may not be the  
66 best predictors of differentiation because adaptation to local climatic conditions causes selection  
67 to generate intraspecific differentiation across environmental gradients, which is known as  
68 isolation-by-environment (IBE; Wang and Bradburd 2014, Myers et al., 2019, Berg et al., 2015;  
69 Zamudio et al., 2016). Because local environmental conditions change rapidly, for example due to  
70 species turnover or succession (Phillips 1996, Nuvoloni et al., 2016), associations between  
71 differentiation and environment are likely more recent phenomena than historical associations.  
72 The increased availability of ecological data for many organisms, such as census data, allows for  
73 testing even shallower associations with genetic structuring across the landscape. Contemporary  
74 demographic data can be used to test isolation-by-abundance (IBA), where genetic differences are  
75 associated with abundance troughs that restrict gene flow (Barton and Hewitt 1981, Hewitt 1989,  
76 Barrowclough et al., 2005). Local population size is also known to be a strong driver of genetic  
77 structure, especially when compounded with environmental change determining local suitability  
78 (Weckworth et al., 2013). While the focus of these models is often on genetic variation, they can  
79 also be applied to phenotypic variation (e.g., Moreira et al., 2020). Phenotypic variation is often  
80 the product of many loci with little effect that are not always distinguishable from the genome  
81 itself. As such, looking directly at phenotype can help reveal whether a particular process is  
82 associated with trait variance. Examining the genomic landscape in the context of these alternative  
83 spatial models will provide evidence for how factors of varying temporal resolutions influence the  
84 peaks and valleys of differentiation. To investigate how landscape features impact genotype and  
85 phenotype, we use an exemplar community of co-distributed taxa across the Sonoran and  
86 Chihuahuan deserts of the southwestern USA and northern Mexico.

87 Here we characterize the genomic landscapes of birds occurring across the Sonoran and  
88 Chihuahuan deserts and test the relative effect of alternative spatial models in predicting patterns  
89 of intraspecific differentiation. To do this, we integrate population-level whole-genome  
90 resequencing, specimen-based morphometrics, and comparative sampling across ten co-  
91 distributed species that occur across the deserts. We hypothesize that the best-predictors of genetic  
92 diversity will vary across species and different partitions of the data, reflecting the multiple  
93 extrinsic factors that structure variation across the genomic landscape (Supplementary Figure 1).  
94 Alternatively, species could show homogeneous patterns either by the same spatial modeling  
95 predicting differentiation in windows across the whole genome or by species exhibiting congruent  
96 genomic landscapes shaped by the same geographic barrier. We further evaluate whether summary  
97 statistics, reflective of alternative evolutionary processes, could explain alternative spatial  
98 predictors of genomic landscapes. This comparative framework will provide resolution to the  
99 extent at which peaks and valleys of the genomic landscape correspond to historical through  
100 contemporary factors.

## 101 **Results**

### 102 *Genomic results*

103 We sequenced the genomes of 221 individuals across 10 focal species of passerine  
104 distributed in the Sonoran and Chihuahuan deserts. Based on the amounts of missing data, we  
105 created three datasets: a complete dataset, a dataset where up to 75% missing data was allowed,  
106 and a dataset where up to 50% missing data was allowed. We found that the three missing data  
107 partitions did not vary substantially with respect to coverage or number of SNPs. As such, here we  
108 describe the results for the complete dataset (for the 75% and 50% missing data partitions, see  
109  
110

111 Supplementary Information). We recovered sequences with a mean coverage of 2.9 per individual  
 112 (range 0.4–8.8), 6–25 million reads per individual, and 5–28 million SNPs per species. Mean  
 113 coverage within species ranged from 2.1–4.2 *Phainopepla nitens* the lowest coverage and  
 114 *Melozone fusca* having the highest. The average missing data per species ranged from 48–64%.  
 115 Across individuals, missing data ranged from 13–93% with a mean of 53% (Table 1).

116 We estimated recombination rates using ReLERNN (Adrion et al., 2020). Mean  
 117 recombination rates for the entire genome ranged from 8.8–10.6 x 10<sup>-10</sup> c/bp (where c is the  
 118 probability of a crossover) across species. Correlations between species in mean recombination  
 119 across chromosomes range from -0.57 to 0.61 (mean±SD 0.01±0.29). Correlations in mean  
 120 recombination at the same genomic positions ranged from -0.31 to 0.36 (mean±SD -0.03±0.17).

121  
 122 Table 1: Chromosome-wise values for the recombination rate, F<sub>ST</sub>, D<sub>XY</sub>, and proportion of missing data per each  
 123 species. Values given as mean±standard deviation (number of chromosomes). These are calculated by weighting all  
 124 chromosome means equally; for size-weighted values see Supplementary Table 1. Note that the number of  
 125 chromosomes is based off of the pseudo-chromosomes we generated, with a maximum of 36. “Rec”=population  
 126 recombination rate, or rho. Values are given for the complete dataset; for the 50% and 75% values, see Supplementary  
 127 Table 2.

| Species                                | Rec (x 10 <sup>-10</sup> ) | F <sub>ST</sub> | D <sub>XY</sub>   | % Missing Sites |
|----------------------------------------|----------------------------|-----------------|-------------------|-----------------|
| <i>Vireo bellii</i>                    | 9.7±1.2 (33)               | 0.06±0.09 (35)  | 0.011 ±0.005 (31) | 0.64±0.79 (36)  |
| <i>Amphispiza bilineata</i>            | 10.0±1.2 (2)               | 0.02±0.001 (35) | 0.018 ±0.005 (20) | 0.55±0.43 (36)  |
| <i>Campylorhynchus brunneicapillus</i> | 10.4±0.3 (31)              | 0.03±0.001 (34) | 0.011 ±0.008 (31) | 0.55±0.02 (36)  |
| <i>Toxostoma crissale</i>              | 10.5±0.4 (31)              | 0.04±0.004 (34) | 0.01 ±0.006 (31)  | 0.52±0.41 (36)  |
| <i>Toxostoma curvirostre</i>           | 10.0±0.5 (34)              | 0.10±0.023 (34) | 0.013 ±0.009 (32) | 0.52±0.41 (36)  |
| <i>Auriparus flaviceps</i>             | 10.2±0.7 (34)              | 0.05±0.006 (36) | 0.015 ±0.007 (35) | 0.56±0.47 (36)  |
| <i>Melozone fusca</i>                  | 10.1±0.5 (35)              | 0.04±0.004 (35) | 0.015 ±0.01 (24)  | 0.51±0.47 (36)  |
| <i>Polioptila melanura</i>             | 9.7±0.7 (29)               | 0.03±0.001 (34) | 0.014 ±0.01 (23)  | 0.52±0.43 (36)  |
| <i>Phainopepla nitens</i>              | 10.0±0.6 (30)              | 0.02±0.001 (34) | 0.012 ±0.007 (28) | 0.65±0.01 (36)  |
| <i>Cardinalis sinuatus</i>             | 9.8±0.6 (36)               | 0.03±0.005 (36) | 0.015 ±0.01 (26)  | 0.52±0.35 (36)  |

128  
 129 *Lostruct outliers and F<sub>ST</sub> outliers*

130 We divided the genome into three kinds of partitions. First, we analyzed chromosomes  
 131 independently. Second, we identified high F<sub>ST</sub> outliers and analyzed those. Finally, we performed  
 132 a multidimensional scaling (MSDS) analysis the using R package lostruct version 0.0.0.9000 (Li  
 133 and Ralph 2019), which subdivided genomes into four partitions, three outliers (LS1, LS2, LS3)  
 134 and one non-outlier partition (Figure 1; Supplementary Figure 2). Note that outlier groupings of  
 135 the same color are not analogous across taxa. On average across all species 85.3% of labeled values  
 136 were non-outliers, and ~4.88% each were LS1, LS2, and LS3.

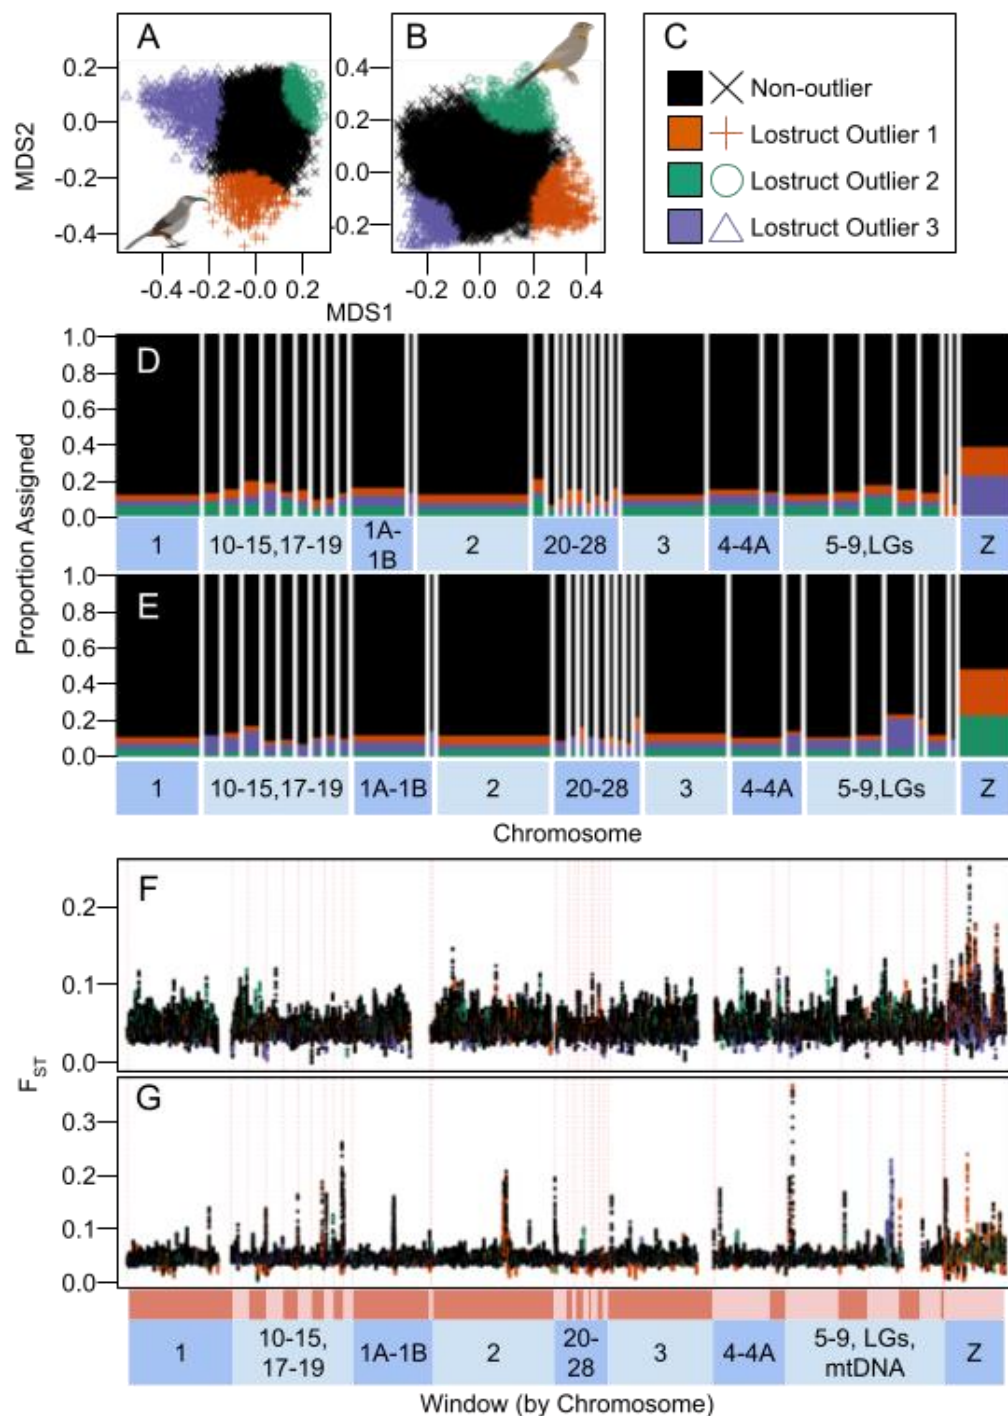

137  
 138 Figure 1: Lostruct partitions vary across species and across chromosomes. Two exemplar species pictured, *Toxostoma*  
 139 *crissale* (panels A, D, F) and *Melozone fusca* (panels B, E, G). For all 10 species see Supplementary Figure 2. Panels  
 140 A and B: Multidimensional scaling coordinates 1 (x-axis) vs 2 (y-axis) for each species, with outlier points highlighted  
 141 in orange, green, and purple as different partitions, and non-outlier points in black. Panel C: Legend describing colors  
 142 and shapes in panel C, with black X's showing non-outlier partitions, orange crosses showing lostruct outlier 1, green  
 143 circles showing district outlier 2, and purple triangles showing lostruct outlier 3. Panels D and E: Proportion of  
 144 chromosomes assigned to lostruct outliers and non-outliers in panels D and E. Width of bars approximately  
 145 proportional to length of windows assessed in each chromosome. Panels F and G:  $F_{ST}$  values for windows across the  
 146 genome, colored by lostruct partition, with windows without lostruct data in gray. Note that  $F_{ST}$  values are not on the  
 147 same scale. Chromosomes separated by red lines, with legend at the top.

148 We calculated  $F_{ST}$  values across the genome using ANGSD's realSFS function (Meisner  
149 and Albrechtsen 2018).  $F_{ST}$  outlier analysis for our species across the datasets with complete, 75%,  
150 and 50% missing data found largely congruent results (see Supplementary Information for 75%  
151 and 50% datasets). The number of high  $F_{ST}$  outliers for the complete dataset ranged from 28–758  
152 across species (with the total number of windows analyzed per species ranging from 100,733–  
153 113,555). The outlier lostruct partitions identified above (LS1, LS2, LS3) vary in the proportion  
154 of the  $F_{ST}$  outliers examined (for the complete dataset), ranging from 0.0%–3.4% (mean 0.2%) for  
155 peaks. Though not significant, there appears to be a trend where species with generally higher  $F_{ST}$   
156 have more high  $F_{ST}$  outliers identified.

### 157 158 *Population differentiation*

159 Population differentiation across the Sonoran and Chihuahuan deserts was estimated using  
160 PCAngsd in ANGSD (Meisner and Albrechtsen 2018). Species ranged from being highly  
161 structured among deserts in four species (*T. curvirostre*, *V. bellii*, *A. flaviceps*, and *P. melanura*),  
162 showing a gradient of structuring with admixture in three (*T. crissale*, *M. fusca*, and *Cardinalis*  
163 *sinuatus*), or unstructured in the remaining taxa (*A. bilineata*, *C. brunneicapillus*, *P. nitens*;  
164 Supplementary Figure 3).  $F_{ST}$  values for the species within these three groups varied accordingly:  
165 highly structured=0.03–0.10; gradient=0.03–0.04; and unstructured=0.02–0.03. Population  
166 differentiation estimated from the chromosomal partitions were generally concordant with  
167 genome-level patterns, but smaller chromosomes and/or those with fewer SNPs showed different  
168 patterns (Figure 2, Figure 3, Supplementary Figure 4).

169 After estimating population differentiation, we calculated clines of population assignment  
170 across the range of each species, examining cline width and cline center. For cline-based analyses,  
171 mean cline width ranges from 6.94–15.89° longitude, where the total area encompassed by each  
172 species was ~18° longitude (with zero on the cline defined as 116.10°W longitude; Supplementary  
173 Table 3; Figure 2; Figure 3; Supplementary Figure 1). Cline width increases as chromosome size  
174 decreases ( $p=1.4 \times 10^{-6}$ , adjusted  $R^2=0.06$ ), though this varies across species (range  $p$   $7.7 \times 10^{-7}$ –0.43,  
175 range adjusted  $R^2$  -0.01–0.51). Mean cline center location ranges from 3.58° along the cline  
176 (~112.52°W) to 12.70° along the cline (~103.4°W). We found that there were negative correlations  
177 between the degree of population structure (measured by  $F_{ST}$ ; see Supplementary Information) and  
178 both mean cline width and the standard deviation of cline center locations, which is expected based  
179 on how clines are calculated. Species with higher  $F_{ST}$  between populations had narrower clines  
180 and less variation among partitions in the locations of their clines (Supplementary Figure 5).

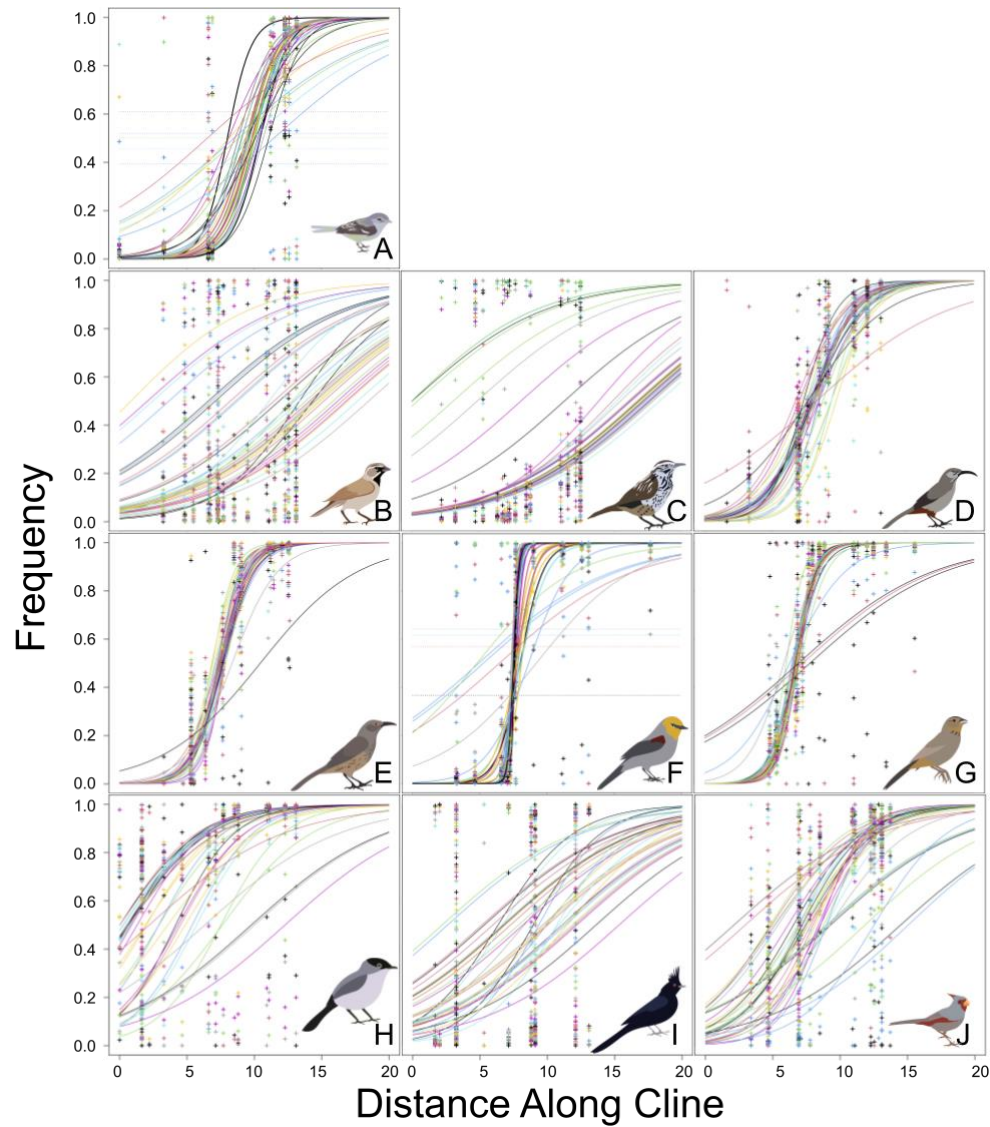

181  
182 Figure 2: Cline width and center location vary across species and across chromosomes. X-axis shows distance (in  
183 degrees longitude) along the sampled area. Y-axis shows the projected cline from population assignments of 0 to 1 in  
184 each taxon (panel) and each chromosome (colored lines). Hash marks show population assignments for each  
185 individual. Species are as follows: A) *Vireo bellii*, B) *Amphispiza bilineata*, C) *Campylorhynchus brunneicapillus*, D)  
186 *Toxostoma crissale*, E) *Toxostoma curvirostre*, F) *Auriparus flaviceps*, G) *Melospiza fusca*, H) *Polioptila melanura*,  
187 I) *Phainopepla nitens*, J) *Cardinalis sinuatus*.

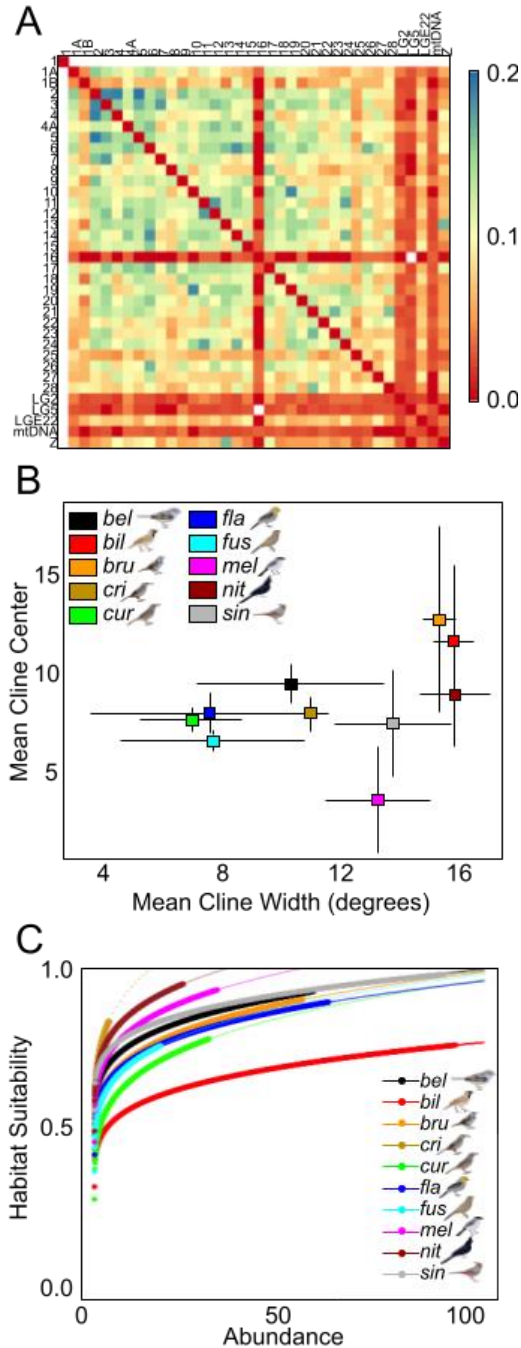

188  
189  
190  
191  
192  
193  
194  
195  
196  
197  
198  
199

Figure 3. Species vary in their chromosomal structure, population structure, ecology, and abundance across the Sonoran and Chihuahuan deserts. A) Standard deviations of Robinson-Foulds distances across species; see Supplementary Figure 4. Warmer colors indicate lower standard deviations. Chromosomes are arranged in alphanumeric order. B) Mean cline width in degrees vs. mean cline center across chromosomes for each species; see Figure 2. Lines from each point show standard deviations. Species names are shortened for legibility (“bel”=*Vireo bellii*, “bil”=*Amphispiza bilineata*, “bru”=*Campylorhynchus brunneicapillus*, “cri”=*Toxostoma crissale*, “cur”=*Toxostoma curvirostre*, “fla”=*Auriparus flaviceps*, “fus”=*Melospiza fusca*, “mel”=*Poliophtila melanura*, “nit”=*Phainopepla nitens*, “sin”=*Cardinalis sinuatus*). C) Predicted abundance-habitat suitability relationships for each species; see Supplementary Figure 6, Supplementary Figure 7, Supplementary Figure 8. Colors indicate individual species. Points are large for actual abundance metrics for each species; small points show predicted suitability at non-observed higher abundances. Species names as in Part B.



200 *Morphological variation across the Cochise Filter Barrier*

201 Across the 10 focal species, we measured 294 individuals, including bill, wing, tail, and  
202 leg morphology. We collapsed these metrics into a principal components analysis. There were no  
203 clear, desert-specific patterns in variation across the Cochise Filter Barrier (N=234), with  
204 morphological changes ranging from subtle to significantly different. In our principal components  
205 analysis, the first three principal components (PC1, PC2, PC3) explained 74%, 12%, and 6% of  
206 the variation in morphology and corresponded approximately to overall body size, bill size/shape,  
207 and wing size/shape, respectively (Supplementary Table 4, Supplementary Table 5;  
208 Supplementary Figure 9). We found significant differences across the Cochise Filter Barrier in six  
209 species in at least one analysis (see Supplementary Information for more details). Between deserts  
210 *T. crissale* and *C. sinuatus* differed in body size and bill shape. *Vireo bellii* and *M. fusca* differed  
211 in bill shape. *Poliioptila melanura* and *A. flaviceps* differed in body size. No species showed  
212 significant differences in wing shape.

213

214 *Climatic suitability and abundance across the Cochise Filter Barrier*

215 Using MaxEnt (Phillips et al., 2006), WorldClim (Hijmans et al., 2005), and other  
216 environmental variables (see Methods), we calculated ecological niche models for the present, the  
217 mid-Holocene, and the Last Glacial Maximum. During the Last Glacial Maximum, the most  
218 suitable areas for all taxa were projected to be further south than the most suitable areas during the  
219 present and mid-Holocene. Regions that are predicted to be suitable through all three periods are  
220 often reduced compared to current distributions (Supplementary Figure 8; Supplementary Figure  
221 10). We calculated abundance for each species using the Breeding Bird Survey (Pardieck et al.,  
222 2019). Abundance was correlated with predicted climatic suitability across all taxa, with adjusted  
223  $R^2$  values of fit lines (log-scaled) ranging from 0.42–0.62 (Figure 3, Supplementary Figure 6,  
224 Supplementary Figure 7).

225

226 *Phenotypic and genotypic datasets are idiosyncratic with respect to landscape features*

227 We chose five metrics of landscape variation (IBA, IBB, IBD, IBE, and IBH) to evaluate  
228 against genetic and phenotypic variation within taxa. Differences in variation were attributed to  
229 each of these landscape metrics using generalized dissimilarity matrix (GDM) modeling. We  
230 evaluated models that were univariate (variation ~ landscape metric), bivariate (variation ~ IBB +  
231 landscape metric), and trivariate (variation ~ IBB + IBD + landscape metric); we focus on  
232 univariate models. Performance of the GDM models was consistent whether looking at univariate,  
233 bivariate, or trivariate data partitions (see Supplementary Information). 2,945/3,030 univariate  
234 models converged successfully with an overall 98% convergence. Of the 505 datasets tested,  
235 30.0% selected IBE as the best factor explaining variation, 21.3% selected IBB, 18.2% selected  
236 IBA, 14.2% selected IBD, 11.5% selected IBH, and the remainder were ambiguous, with multiple  
237 models equally explaining variation. Within the ambiguous models, of which there were 23, 82.6%  
238 had IBH as one of the best models, 73.9% had IBE as one of the best models, 56.5% had IBA as  
239 one of the best models, 23.1% had IBD as one of the best models, and notably, none of them had  
240 IBB as one of the best models.

241 Across all of the GDMs performed, percent deviance explained by the best model was  
242 variable, ranging from 0.1% to 81.9%. The mean $\pm$ SD percent deviance explained across all  
243 datasets was 16.8% $\pm$ 18.2%. Percent deviance explained for the whole genome was lower on  
244 average, ranging from 0.5%–6.9% (mean $\pm$ SD 3.9% $\pm$ 2.2%).  $F_{ST}$  outliers, both high and low, tended  
245 to have higher percent deviances explained, ranging from 0.14%–69.9% (mean $\pm$ SD

246 25.9%±22.4%). Lostruct outliers ranged from 1.0%–54.25% (mean±SD 11.0%±12.6%). Percent  
 247 deviance explained had the most extreme range in morphology, from 0.3% to 81.9% (mean±SD  
 248 17.5%±20.8%). The percent deviance explained varied across taxa, with means ranging from 7.5%  
 249 (*M. fusca*) to 27.9% (*P. nitens*) and standard deviations ranging from 12.1%–24.0%.

250 For the models examining signals across the whole genomes, three species had IBB as the  
 251 most important predictor, three had IBE, two had IBH, one had IBA, and one had IBD. (Figure 4;  
 252 Supplementary Figure 11). It is notable that all of the genomes identified as having IBE as the best  
 253 predictor are taxa that are structured across the Cochise Filter Barrier. Chromosome length does  
 254 not significantly predict any differences between models ( $p>0.47$ ,  $n=347$ ).

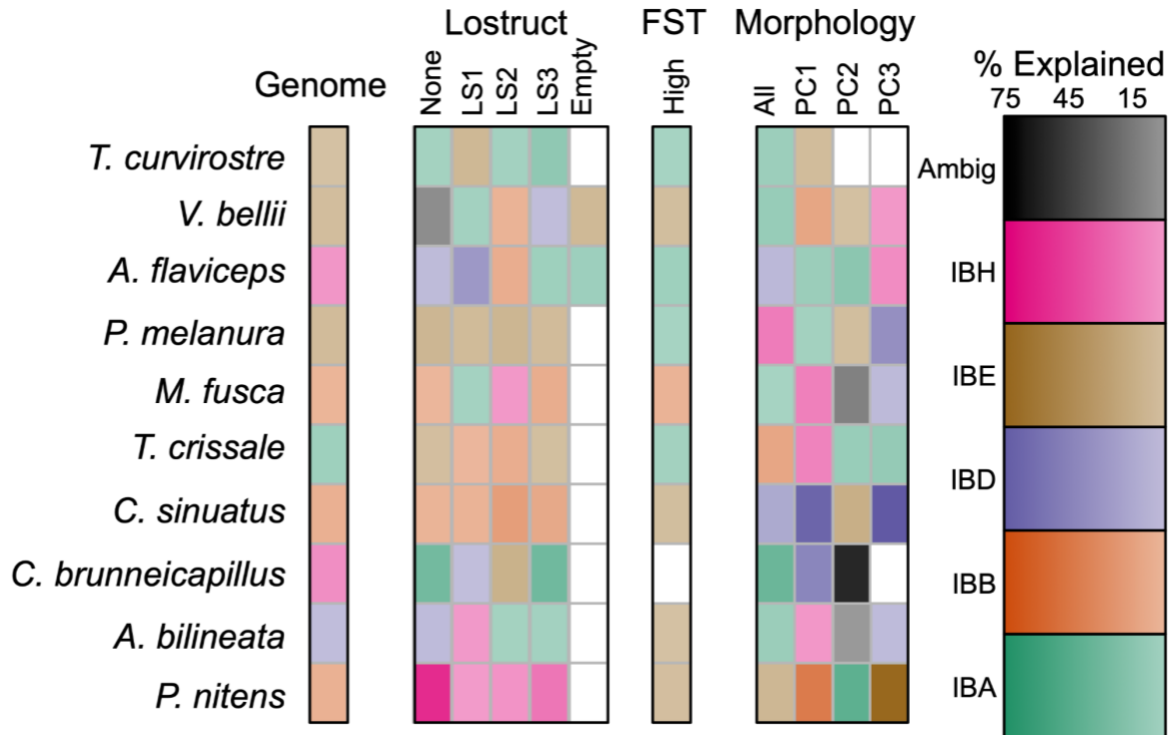

255  
 256 Figure 4: Generalized Dissimilarity Modeling revealed heterogeneous associations between genomic and phenotypic  
 257 differentiation and alternative spatial hypothesis. Shown is the GDM model summary for each species and partition.  
 258 Species are along the y-axis and arranged from most to least differentiated across the Cochise Filter Barrier. Individual  
 259 partitions (genome,  $F_{ST}$  high and low outliers, morphology) are along the x-axis. Color indicates the best model. Shade  
 260 of color indicates how much support the model has (with darkest shade indicating up to 75% support and lightest  
 261 shade indicating 0%). White boxes have no associated data due to failure of models to converge. The alternative  
 262 models were as follows: isolation by abundance (IBA), isolation by barrier (IBB), isolation by distance (IBD), isolation  
 263 by environment (IBE), and isolation by history (IBH). “Ambig” is shorthand for ambiguous partitions that show a  
 264 mixture of models that best explain the data. White boxes represent partitions that failed to converge or did not have  
 265 corresponding datasets. For more partitions of data see Supplementary Figure 11.

266  
 267 For the lostruct partitions, the three outlier partitions (LS1, LS2, LS3) had 5/30 with IBA  
 268 as the best model, 10/30 IBB, 3/30 IBD, 9/30 IBE, and 3/30 IBH. Most species showed at least  
 269 some overlap in which model best explained partitions: for example, *A. bilineata*, *T. crissale*, and  
 270 *C. sinuatus* all have at least two lostruct partitions best explained by IBB. For the non-outlier  
 271 partitions (LS0, and the “empty” partition for *V. bellii* and *A. flaviceps*), these best model chosen  
 272 is the same as the best model explaining whole-genome variation in four species (*V. bellii*, *P.*  
 273 *melanura*, *C. sinuatus*, *M. fusca*) and that of one of the outlier partitions in all but two species (*V.*

274 *bellii*, *A. bilineata*). Notably, for *P. melanura* IBE explains all three outlier partitions, the genome,  
275 and the non-outlier lostruct partitions. Likewise, for *C. sinuatus*, all of these are explained by IBB.

276 All ten species had high-F<sub>ST</sub> partitions identified (see Supplementary Information for 75%  
277 and 50%) across the complete, 75%, and 50% datasets. The genome matched at least one of the  
278 high or low partitions in four taxa: *Vireo bellii*, *A. bilineata*, *Toxostoma crissale*, and *Melospiza*  
279 *fusca*. With respect to significance, none of the F<sub>ST</sub> outlier partitions were significantly different  
280 (but see Supplementary Information).

281 There was little congruence across the best landscape predictor of morphological data  
282 within species. Overall morphological differentiation had the same explanatory variables as PC3  
283 for *P. nitens* (IBE), and as PC1 for *C. sinuatus* (IBD). Additionally, some individual PCs did match  
284 each other: IBD best explained PC1 and PC3 in *C. brunneicapillus*, IBA best explained PC2 and  
285 PC3 in *T. crissale* and PC1 and PC2 in *A. flaviceps*, and for *T. curvirostre*, PC2 and PC3 both  
286 showed ambiguous results. Neither overall morphology nor the PCs were significantly different  
287 than expected in the univariate dataset (though some were in the bivariate and trivariate datasets;  
288 see Supplementary Information).

289 Like overall variation, PC1 (body size) showed an even distribution between all models  
290 across the 10 species (i.e., 20% each IBA, IBB, IBD, IBE, and IBH). PC2 (bill shape) was best  
291 explained in 30% of species by IBA, 20% by IBE, 10% by IBD, and 40% of the species showed  
292 ambiguous results. Lastly, PC3 (wing shape) was best explained in 40% of species by IBD, 20%  
293 each by IBA and IBE, 10% IBD, and 10% of species had ambiguous results.

#### 294 295 *Data characteristics of best-fit models*

296 We looked at whether differences in summary statistics could explain our univariate  
297 models (IBA, IBB, IBD, IBE, IBH) across taxa (Supplementary Figure 12; Supplementary Figure  
298 13; Supplementary Figure 14). The summary statistics we examined were recombination rate,  
299 missing data, F<sub>ST</sub>, D<sub>XY</sub> calculated using ngsTools (Fumagalli et al., 2014), and the length of the  
300 chromosome. The clearest pattern was that datasets with ambiguous results among models had  
301 more missing data than all others except IBH models (p<0.0001). IBH results also tended to have  
302 more missing data than most other models (p<0.02), but we found that this relationship was not  
303 significant when we excluded *P. nitens*, which had both the largest proportion of models explained  
304 by IBH and a high proportion of missing data (p>0.70). F<sub>ST</sub> was significant overall (p<0.04), with  
305 IBB models having significantly higher F<sub>ST</sub> than IBH models. This relationship was no longer  
306 significant in bivariate or trivariate models because IBB was not present (see Supplementary  
307 Information). D<sub>XY</sub> was also significant overall (p<0.05), but Tukey's honestly significant  
308 difference tests showed that none of the individual comparisons were significant (p>0.06).  
309 Recombination rate and chromosome length were not significant for univariate models (p>0.07)  
310 though recombination rate was significant for bivariate and trivariate models (see Supplementary  
311 Information).

#### 312 313 *Landscape predictors are not influenced by habitat suitability*

314 From the ENMs, we calculated habitat suitability for each species across the deserts.  
315 Species with more variable suitability across the contact zone have a higher proportion of IBH as  
316 the best model (adjusted-R<sup>2</sup>=0.54, n=10, p<0.01). As *P. nitens* has both the highest proportion of  
317 IBH and the highest variance in suitability, we removed this species in case it was acting as an  
318 outlier. After removing this species, the relationship was only nearly significant, but strong

319 (adjusted- $R^2=0.28$ ,  $n=9$ ,  $p<0.09$ ). Evaluating this relationship with ANOVA tests finds the same  
320 results, where no comparisons are significant without *P. nitens*.

321

### 322 *Significance evaluation of hypotheses of evolution across the Cochise Filter Barrier*

323 Species differ more than expected with respect to what spatial models best explain their  
324 genotypes and phenotypes. Best-predictors vary across individual species ( $\chi^2=284.0$ ,  $p\sim 0.0$ ,  $df=54$ ,  
325 simulated  $p<0.0005$ ), individual partitions of genotype and phenotype differed ( $\chi^2=685.6$ ,  $p\sim 0.0$ ,  
326  $df=324$ , simulated  $p<0.0005$ ), and with respect to phylogeographic structure across the Cochise  
327 Filter Barrier ( $\chi^2=62.9$ ,  $p<6.5\times 10^{-9}$ ,  $df=12$ , simulated  $p<0.0005$ ).

328

## 329 **Discussion**

330 We found that the best-fit spatial model differed across partitions at multiple scales. Our  
331 taxa, which varied in levels of genomic diversity, showed evidence that different spatial processes  
332 (reflecting historical through contemporary phenomena) had distinct impacts on the genome  
333 compared to targeted subsets of the genome. Similar patterns of heterogeneity were observed  
334 among species and with their phenotypic datasets. The disparity in predictors of intraspecific  
335 differentiation among the whole genome versus windows and between windows extends the view  
336 that evolutionary inferences are dependent on which portions of the genome are examined in a  
337 spatial framework. The heterogeneity in model fit across partitions was consistent with the  
338 expectation that various evolutionary processes contribute to the peaks and valleys of the genomic  
339 landscape. By applying this framework across an assemblage of birds that evolved across a  
340 common, dynamic region we showed that at the community-scale, predictors of genomic structure  
341 remain idiosyncratic, which may reflect taxa at different stages of the evolutionary histories and  
342 responses to the biogeographic barrier.

343

### 344 *Extrinsic drivers of the genomic landscape*

345 Our modeling showed that environmental distance was often a strong predictor of levels of  
346 intraspecific differentiation, but this pattern was species- and partition-dependent. Genome-wide  
347 patterns of differentiation across the Cochise Filter Barrier are partially shaped by environmental  
348 adaptation as observed in non-avian taxa distributed across the barrier (Myers et al., 2019).  
349 Environmental adaptation is often recovered in taxa who respond to environmental gradients via  
350 altered phenotypes (Branch et al., 2017, Dubec-Messier et al., 2018), genotypes (Berg et al., 2015,  
351 Manthey and Moyle 2015), or both (Ribeiro et al., 2019). However, our analyses show there was  
352 considerable variation among individual regions in the genome, indicating a more nuanced pattern.  
353 The species-specific results we found suggests that individual taxa had unique responses to shared  
354 aspects of the landscape. Although the focal taxa are co-distributed, we showed how environmental  
355 suitability, their general morphologies, and abundances across space varied among species, which  
356 may help explain why best-fit models differed. As such, these species-specific factors may explain  
357 isolation-by-environment was the best explanatory variable for many, but not all, of the species  
358 we investigated.

359 Individual partitions of the genome also varied with respect to how much environmental  
360 variation played a role. At one extreme, environmental variation appears to have little impact on  
361 the sex chromosomes. The Z chromosome often showed the barrier (i.e., IBB) as being the most  
362 important factor, even in unstructured species such as *Amphispiza bilineata* and *Campylorhynchus*  
363 *brunneicapillus*, perhaps because the locus evolves faster than sites under selection for adaptation  
364 to local environmental conditions. Sex chromosomes are known to diverge faster than autosomes

365 due to their differences in effective population size (Mank et al., 2010), importance in sexual  
366 selection (Kirkpatrick 2017), and the presence of speciation genes (Sæther et al., 2007). Given the  
367 lack of evidence for environmental variation predicting spatial genetic differentiation on the Z  
368 chromosome, this would suggest that any speciation genes present in these taxa may not be  
369 involved in adaptation to the environment.

370 Environment was the most important driver for species with genetic structure. The most  
371 intuitive explanation for this was that population structuring in these taxa was facilitated by natural  
372 selection to different environments. There was some evidence that this could have happened across  
373 other taxa that occur across the Cochise Filter Barrier, as IBE was the best predictor of genome-  
374 wide divergence in a community of snakes distributed across the barrier (Myers et al., 2019).  
375 However, we must stress that while this explanation was the most intuitive and aligns with  
376 predictions, there are numerous processes that can produce IBE (Wang and Bradburd 2014), and  
377 it is possible that divergence led to adaptation to these environments secondarily, rather than the  
378 reverse, or the patterns are being influenced by some unknown factors that we did not quantify.  
379 Nevertheless, at present our results are consistent with the importance of ecologically mediated  
380 population differentiation, or isolation-by-environment, in structuring communities across the  
381 deserts of North America.

382

### 383 *Contemporary versus historical predictors of genomic differentiation*

384 Our finding that the best-fit models varied across species was consistent with the  
385 expectations that species idiosyncratically respond, over a range of time scales, to the Cochise  
386 Filter Barrier. The spatial patterns we examined vary temporally, with Pleistocene environmental  
387 changes being a historical process, while geographic distances, abundances, and environmental  
388 variation reflecting more contemporary processes. Historical signatures of Pleistocene isolation  
389 are commonly recovered patterns for the Cochise Filter Barrier (Provost et al., 2021) and other  
390 communities (Shafer et al., 2010; Ralson et al., 2021), but our data showed that isolation in glacial  
391 refugia often did not best explain genome-wide differentiation. This could be due to erosion of  
392 historical signals as the Cochise Filter Barrier filters taxa and changes contemporary patterns of  
393 gene flow. Alternatively, our proxy for IBH (resistance over projected Pleistocene habitat  
394 suitability) may be a poor model for actual historical isolation. For example, paleoenvironmental  
395 gradients may no longer be as readily detectable. The presence of the barrier alone was a better  
396 predictor despite being atemporal.

397 In contrast, current environments best explain three genomes and the majority of partitions  
398 for five species (with abundances and geographic distances playing a lesser role), suggesting that  
399 phenomena operating on more recent timescales influenced genetic and morphological variation  
400 across the landscape. If some of the taxa herein are going through incipient speciation, then these  
401 contemporary factors should be most potent. Our identification of species abundances as a  
402 relatively important predictor of genetic divergence aligns well with landscape genetic studies that  
403 use proxies for the effects of contemporary phenomenon and ecological factors on genetic  
404 variation (Burney and Brumfield 2009, Paz et al 2015). For example, urbanization, which  
405 fragments and reduces population sizes, is well known to impact rates of gene flow and drift, acting  
406 as a strong barrier of gene flow since the 20th century (Miles et al., 2019). Our use of available  
407 abundance data across large spatial scales shows a more direct relationship between varying  
408 abundances across the landscape with levels of differentiation. Further, while both historical and  
409 contemporary processes are influencing taxa across this biogeographic barrier, contemporary  
410 patterns are seemingly more influential.

411  
412 *Relationship between best-models and window summary-stats*

413 In contrast to the extrinsic drivers of the genomic landscape that we have focused on here,  
414 there were no clear associations between partition characteristics and support for a particular  
415 model. For example, we found no significant differences in any species between recombination  
416 rate across chromosomes and which spatial models were most important on that chromosome. At  
417 the phylogeographic-scale, low recombination regions of the genome have been shown to be more  
418 likely to reflect population structure (Manthey et al., 2021) and the species tree topology (Thom  
419 G, Moreira LR, Batista R, Gehara M, Aleixo A, Smith BT, unpublished data,  
420 <https://www.biorxiv.org/content/10.1101/2021.12.01.470789v1>). The avian recombination rate  
421 landscape is thought to be conserved across taxa, even though exact genomic locations of  
422 divergence across taxa are not (Singhal et al., 2015, Turbek et al., 2021), with our ten focal species  
423 ranging in divergence time from ~75 thousand to ~12 million years between taxa (Harris et al.,  
424 2018; Kumar et al., 2017; Barker et al., 2015; Mason and Burns 2013; Price et al., 2014; Pasquet  
425 et al., 2014; Hooper and Price 2017; Mitchell et al., 2016; Gibb et al., 2015). Correlations in  
426 recombination rates at the same genomic position in these species are greater than 0.37 across  
427 chromosomes and always positive (Turbek et al., 2021). The ten desert birds we investigated, in  
428 contrast, have estimated divergence times ranging from ~10 to ~60 million years between taxa  
429 (Kumar et al., 2017; Barker et al., 2015; Mason and Burns 2013), with correlations in  
430 recombination rates at the same genomic position that were often smaller in magnitude and  
431 negative. This could reflect a real pattern, where the recombination landscapes are only conserved  
432 within more closely related species; our closest taxa, the two non-sister *Toxostoma*, do have the  
433 highest correlation in recombination rates across windows and are in the top 25% of the  
434 distribution in correlations. However, the differences found could have been caused by coverage  
435 depth, differences in the recombination rate estimators used, or missing data allowance. In  
436 addition, genetic partitions with higher  $F_{ST}$  were more likely to show isolation-by-barrier as the  
437 best model. These two metrics should be correlated; the former quantifies the degree of  
438 differentiation across the Cochise Filter Barrier, and the latter assigns individuals to their  
439 respective sides of the Cochise Filter Barrier. In species where there was differentiation, these two  
440 measures should describe the same phenomenon. This likely reflects the gradient in differentiation  
441 across species in the community. Given the wide variation across taxa, future work must be done  
442 to clarify the relationship between genomic architecture and evolutionary signal at multiple  
443 phylogenetic scales.

444 We explored the signal in our data by examining multiple ways of partitioning genomic  
445 windows, using different thresholds of missing data, and evaluating how data attributes influenced  
446 model support. We found that genetic partitions with more missing data were more likely to have  
447 ambiguous results. Genetic summary methods like PCA are impacted by missing data, particularly  
448 when they are imputed, which can cause individuals with disproportionately high levels of missing  
449 data to appear like they are admixed between populations (Yi and Latch 2021). It is likely that the  
450 reverse is true, where individuals with disproportionately low levels of missing data should fall  
451 out as their own populations more readily. For example, in some of our species (namely *Vireo*  
452 *bellii*, *Auriparus flaviceps*, *Polioptila melanura*) the individuals with highest missing data  
453 clustered as their own population before detecting any other spatial patterning. We ameliorated  
454 this by dropping individuals with too much missing data in some of our datasets. Overall, we did  
455 not find qualitative differences in population assignments, but it did generally inflate our fixation  
456 values and deflate our genetic diversity values. This is sensible, as reducing the number of

457 individuals should both increase the likelihood of fixation due to sampling error as well as decrease  
458 the overall amount of nucleotide diversity.

459

#### 460 *Morphological versus genetic associations*

461 We found that in most taxa, genotypic and phenotypic variation within species, and even  
462 different aspects of morphological phenotype within species, were not associated with the same  
463 landscape factors. Phenotypes were better explained by abundance, whereas genotypes were better  
464 explained by the contemporary environment. Discordance between genetic and phenotypic  
465 predictors of spatial variation have been observed in other systems, where phenotypic variation  
466 was better explained by the environment (Moreira et al., 2020). This discordance could be due to  
467 polygenic traits, where genotype-phenotype associations may be mediated by multiple loci of  
468 small effect working in concert, either by changing protein structure or regulation (Yusuf et al.,  
469 2020, Knief et al., 2017, Duntsch et al., 2020, Aguillon et al., 2021). However, for some  
470 phenotypes like plumage color, single genes of large effect have been implicated which should  
471 strengthen correlations between genotype and phenotype, at least for those loci (Sin et al., 2020;  
472 Toews et al., 2016). For desert birds in particular, phenotypic variation in metabolism (as well as  
473 in microbiomes) has been linked to genes that vary with the environment (Ribero et al., 2019). In  
474 our study, as with genetic differentiation, the extent of phenotypic structuring varied across  
475 species, with bill and body size being significantly different between deserts in a few taxa, but  
476 somewhat surprisingly, environmental variation did not usually explain morphological  
477 differences. For example, adaptations in bill morphology are frequently observed, such as in Song  
478 Sparrows on the Channel Islands that have higher bill surface area in hotter climates (Gamboa et  
479 al., 2021). The lack of a tight correlation between environment and phenotype were likely  
480 reflective of the shallowness of the evolutionary divergences and the subtlety of the environmental  
481 gradient across deserts. The two *Toxostoma* species in our study have previously shown  
482 contrasting patterns with respect to climate on beak morphology: *T. crissale* has larger bills in drier  
483 habitats, which may aid in cooling while conserving water, while *T. curvirostre* showed a pattern  
484 contrary to thermoregulatory predictions with larger bills in cooler climates (Probst et al., 2021),  
485 suggesting even in closely related species climate may not have the same role on morphological  
486 variation. Even though phenotypic data partitions often did not have the same explanatory factor  
487 with respect to the general dissimilarity modeling, there was a correlation between population  
488 structure in the genome (and chromosomes to a lesser extent) and phenotypic variation across these  
489 ten birds, in that taxa lacking morphological change also lack genetic variation overall.

490

#### 491 *Conclusion*

492 By quantifying patterns in genotypic and phenotypic variation in communities distributed  
493 across a biogeographic barrier, we found that multiple co-occurring processes occur that impact  
494 variation within taxa. Although we found that isolation across an environmental gradient was  
495 among the most important associations in predicting genetic and phenotypic variation, the best-fit  
496 model varied across species and data partitions to reflect these multiple processes. These findings  
497 underscore the importance of accounting for heterogeneity in the genome, phenome, and  
498 diversification mechanisms acting across time and space to have the most comprehensive picture  
499 of spatial structuring in species. This will allow for an assessment of whether best-fit models that  
500 are proxies for neutral and adaptive processes are consistent with partitions that are evolving under  
501 the same conditions. Without a holistic understanding at each of these levels of organization, as  
502 well as the addition of future work that concurrently estimates selection at the organismal and the

503 nucleotide levels, the actual mechanisms that shape communities will remain obscured. Further,  
504 while we did not find consistent predictors of phenotypic divergence, it is still an open question  
505 whether other measures of phenotypic variation (e.g., behavioral) may better track divergence, or  
506 phenotypic divergence does not follow a deterministic pattern along weak environmental  
507 gradients. Overall, this work displays the necessity of integrating spatial predictors of population  
508 divergence, differentiation across the genomic landscape, and phenotypic variation in  
509 understanding the multiple different mechanisms that have produced the population histories we  
510 see across contemporary communities of birds in North America.

511

## 512 **Methods and Materials**

513

### 514 *Study system*

515 The Sonoran and Chihuahuan deserts contain environmental and landscape variation that  
516 make them suitable for testing if any of the five discussed spatial models (IBA, IBB, IBD, IBE,  
517 and IBH) structure intraspecific variation in taxa. Across the two deserts and the transition zone  
518 between them, there is variation in precipitation, elevation, temperature, and vegetation that could  
519 result in local adaptation and isolation-by-environment. (Shreve, 1942; Reynolds et al., 2004).  
520 Pleistocene glacial cycles repeatedly separated and connected, such that some taxa experienced  
521 dramatic range shifts (Zink 2014, Smith et al., 2011), which could have isolated taxa in each desert.  
522 Further, there is a well-studied biogeographic barrier separating the deserts, the Cochise Filter  
523 Barrier, which is an environmental disjunction that demarcates the transition between the Sonoran  
524 and Chihuahuan deserts of southwestern USA and northern Mexico. The barrier is thought to have  
525 begun forming during the Oligo-Miocene and completed during the Plio-Pleistocene (Morafka,  
526 1977, Van Devender, 1990; Van Devender et al., 1984, Holmgren et al., 2007, Spencer, 1996) and  
527 has formed a community ranging from highly differentiated taxa to unstructured populations  
528 (Provost et al., 2021). Demographic troughs caused by spatially varying population abundances  
529 could impact the frequency of gene flow across the landscape and the degree of genetic  
530 connectivity across the deserts.

531

### 532 *Genetic sequencing and genome processing*

533 We performed whole-genome-resequencing across 10 species of birds from the Sonoran  
534 and Chihuahuan deserts, obtaining genetic samples from new expeditions and loans from natural  
535 history museums (*Cardinalis sinuatus*; *Toxostoma crissale*, *Toxostoma curvirostre*; *Amphispiza*  
536 *bilineata*, *Melospiza fusca*; *Polioptila melanura*; *Phainopepla nitens*; *Auriparus flaviceps*;  
537 *Campylorhynchus brunneicapillus*; *Vireo bellii*; Supplementary Table 6; Supplementary Figure  
538 15). These species reflect different songbird morphotypes and ecologies in the deserts (e.g., large-  
539 to small-bodied, insectivorous to granivorous, migratory to resident). Three of these species (*V.*  
540 *bellii*, *T. curvirostre*, *M. fusca*) have shown evidence of structure across the Cochise Filter Barrier,  
541 while an additional three (*P. melanura*, *A. flaviceps*, *C. brunneicapillus*) have shown evidence of  
542 no structure (Zink et al., 2001; Rojas-Soto et al., 2007; Teutimez, 2012; Klicka et al., 2016, Smith  
543 et al., 2018).

544 Using 221 individuals across our 10 focal species, we sequenced 8–14 individuals in both  
545 the Sonoran and Chihuahuan deserts per species for a total of 18–25 samples per species. Library  
546 preparation and sequencing was performed by RAPID Genomics (Gainesville, FL). We mapped  
547 raw reads of each species to their phylogenetic closest available reference genomes  
548 (Supplementary Table 7): notably, *A. bilineata* and *M. fusca* were mapped to the same genome, as



549 were *C. brunneicapillus*, *T. crissale*, *T. curvirostre*, *P. melanura*, and *P. nitens* (see Supplementary  
550 Information). Before mapping, we created pseudo-chromosomal assemblies of these genomes  
551 using Satsuma version 3.1.0 (Grabherr et al., 2010) by aligning to the *Taeniopygia guttata* genome  
552 (GCF\_000151805.1), retaining pseudo-chromosomes with the prefix “PseudoNC”. Hereafter,  
553 pseudo-chromosomes will be referred to as chromosomes.

554 We filtered our sequences with FastQ Screen version 0.14.0 (Wingett et al., 2018) to  
555 remove contamination by filtering out reads that mapped to PhiX and the following genomes:  
556 *Homo sapiens*, *Escherichia coli*, *Enterobacteriophage lambda*, and *Rhodobacter sphaeroides*.  
557 From our raw reads, we used a pipeline that produced genotype likelihoods using ANGSD version  
558 0.929 (Korneliussen et al., 2014). We converted cleaned FastQ files to BAM using bwa version  
559 0.7.15 (Li and Durbin 2009, Li and Durbin 2010) and picard version 2.18.7-SNAPSHOT from the  
560 GATK pipeline (McKenna et al., 2010, DePristo et al., 2011, Van der Auwera et al., 2013). Next,  
561 we prepared the BAM files to be used in the ANGSD pipeline using samtools version 1.9-37 (Li  
562 et al., 2009; Li 2011), bamUtil version 1.0.14 (Jun et al., 2015), and GATK version 3.8-1-0  
563 (McKenna et al., 2010). This pipeline creates genotype likelihoods to account for uncertainty for  
564 low-coverage sequences.

565 We investigated the impact of missing data on our analyses using three thresholds for  
566 retaining sites: a complete dataset, in which all individuals were retained irrespective of missing  
567 data; a 75% dataset, in which individuals were only retained if they had less than 75% missing  
568 sites; and a 50% dataset, in which individuals were only retained if they had less than 50% missing  
569 sites. These different datasets were used for a suite of downstream analyses to assess the sensitivity  
570 of the results to individuals with missing data.

#### 571 572 *Evaluating population structure across the Cochise Filter Barrier*

573 We characterized the degree of population structure across the whole genome and in  
574 individual chromosomes across the Cochise Filter Barrier in our focal species. First, using  
575 PCAngsd in ANGSD (Meisner and Albrechtsen 2018), which assigns individuals to K clusters and  
576 estimates admixture proportions for each individual. To evaluate whether there was structure  
577 across the Cochise Filter Barrier, we selected K=2 (though we visualized K values from two to  
578 three). We performed this for the complete, 75%, and 50% missing data datasets, but found that  
579 these values were largely congruent across the datasets, and so we only use the complete dataset  
580 for describing population structure (Supplementary Figure 16, Supplementary Figure 17,  
581 Supplementary Figure 18). Second, we plotted population assignment changes over space using a  
582 cline analysis via the hzar version 0.2-5 R package (Derryberry et al., 2014) and custom scripts  
583 (modified from Burbrink et al., 2021). Analyses were conducted in R version 3.6.1 (R Core Team  
584 2019). We did this to quantitatively evaluate the differences in population structure across  
585 chromosomes and in the genome more broadly. We thus were able to calculate the location and  
586 width of clines for the entire genome and each chromosome.

587 Complementing our genome-wide analyses, we ran a local principal components analysis  
588 along the genome on the complete dataset using the R package lostruct version 0.0.0.9000 (Li and  
589 Ralph 2019). Different chromosomes showed different relationships between individuals (see  
590 Supplementary Information). Because of this, we wanted to cluster regions of the genome together  
591 that showed similar relationships between individuals in case specific evolutionary processes were  
592 causing this pattern. The lostruct method performs principal component analysis on individual  
593 windows of the genome, then uses multidimensional scaling (MSDS) to summarize how similar  
594 the windows' principal component analyses are when dividing the genome. We extracted three

595 subsets of outliers for each species, which we designated LS1, LS2, and LS3, and compared it to  
596 the remainder of the genome, representing non-outliers.

597

### 598 *Genomic summary statistics*

599 We characterized genetic variation across each species' genome and partitions of the  
600 genome by calculating a suite of summary statistics and metrics. To quantify genetic  
601 differentiation within each species, we calculated pairwise genetic distances between individuals  
602 from VCF files using the `bitwise.dist` function in `poppr` R package version 2.9.2 (Kamvar et al.,  
603 2014; Kamvar et al., 2015), which served as the genetic distance matrices for our generalized  
604 dissimilarity matrix models (see below). The function `bitwise.dist` calculates the Hamming  
605 distance of the DNA (i.e., number of differences between two strings). We scaled this distance  
606 such that missing data was assumed to match sites without missing data, but final distances were  
607 scaled such that comparisons with more missing data would have inflated distances. Neighbor-  
608 joining trees were calculated from these matrices to contrast genealogies across the genome.  
609 Genealogies across the genome were visualized by calculating pairwise and normalized Robinson-  
610 Foulds (RF) distances between all pairs of trees per species (Robinson and Foulds 1981).  
611 Recombination rates (in crossovers per base pair, c/bp) across the genome were estimated using  
612 the program `ReLERN` (Adrion et al., 2020). This program combines simulation with a recurrent  
613 neural network to estimate the recombination rate on each chromosome in 100,000 bp windows.  
614 We also performed a sliding window  $D_{XY}$  analysis using the `calcDxy` R script included with  
615 `ngsTools` version 1.0.2 (Fumagalli et al., 2014), which gives site-wise  $D_{XY}$  values, and then  
616 averaged across windows. Windows were overlapping with a size of 100,000 base pairs and offset  
617 by 10,000 base pairs. Missing data were calculated using `vcftools` (Danecek et al., 2011). This was  
618 calculated per window, per chromosome, per genome, per site, and per individual.

619 Using `ANGSD`'s `realSFS` function, we performed a sliding window  $F_{ST}$  analysis by  
620 converting `SAF` output from `ANGSD` to a site frequency spectrum for both desert populations in  
621 each species. Detailed settings can be found in the supplementary information. We performed  $F_{ST}$   
622 outlier analysis for our species using the calculated  $F_{ST}$  values. Z-scores for  $F_{ST}$  for each species  
623 were calculated using the formula  $Z_{F_{ST}} = (\text{observed } F_{ST} - \text{mean } F_{ST}) / \text{SD } F_{ST}$ . We split the genome into  
624 two different partitions based on these z-scores:  $F_{ST}$  peaks, for values of  $F_{ST}$  greater than five  
625 standard deviations above the mean ( $z\text{-score} > 5$ ) and  $F_{ST}$  troughs for values of  $F_{ST}$  greater than five  
626 standard deviations below the mean ( $z\text{-score} < -5$ ). We only report the  $F_{ST}$  peaks in the main  
627 manuscript: for  $F_{ST}$  troughs, see the supplementary information. We performed this outlier  
628 detection for the complete, 75%, and 50% missing datasets.

629

### 630 *Morphological data*

631 We quantified morphological variation in our 10 focal species to assess which of the spatial  
632 models best explain morphological variation across the landscape (see *Generalized Dissimilarity*  
633 *Matrix Models*). We measured 366 specimens (19–59 per species), excluding known females and  
634 known juveniles to account for any variation attributed to sex and age. Of those, 29 were also  
635 present in the genomic dataset, with 0–8 individuals per species.

636 We generated seven raw plus seven compound morphological measurements, which we  
637 designated as proxies for thermoregulation and dispersal, respectively (see Supplementary  
638 Information). We reduced the dimensionality of the 14 morphological measurements using a  
639 principal components analysis (PCA). We then calculated four distance matrices between  
640 individuals: one Euclidean distance matrix for all morphological variables, where we calculated

641 the euclidean distance between individuals among all raw and calculated measurements; and three  
642 euclidean distance matrices for the first three principal components, PC1, PC2, and PC3. We  
643 assessed whether there were differences in morphological PCA space between the Sonoran and  
644 Chihuahuan Desert populations in each species using DABEST tests in the dabestr package version  
645 0.3.0 (Figure 5; Supplementary Figure 19; Supplementary Figure 20; Ho et al., 2019). Note that  
646 this method does not give explicit significance values, instead it shows whether expected  
647 confidence intervals overlap zero (i.e., no difference between deserts) or not.  
648

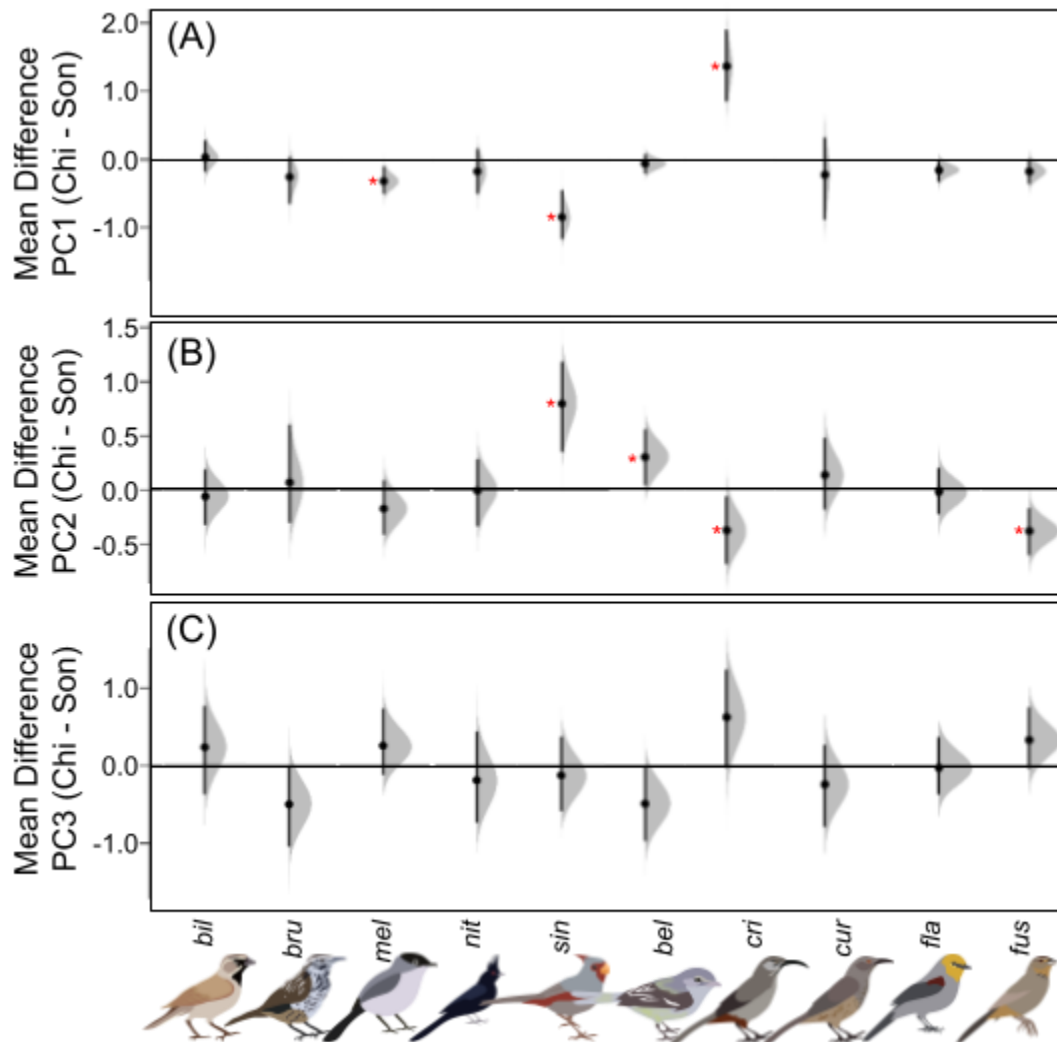

649  
650 Figure 5: Distribution of unpaired mean differences between Sonoran and Chihuahuan desert individuals for each  
651 species from DABEST analysis for morphological PC1 (A), PC2 (B), and PC3 (C). Black horizontal line is at zero,  
652 black points and vertical lines show mean and confidence intervals for each distribution in gray. Comparisons that do  
653 not cross the zero line are considered significant in DABEST tests, indicated with red asterisk. On the X axis are each  
654 species with images (scale does not reflect size differences) with species names are shortened for legibility  
655 (“bel”=*Vireo bellii*, “bil”=*Amphispiza bilineata*, “bru”=*Campylorhynchus brunneicapillus*, “cri”=*Toxostoma crissale*,  
656 “cur”=*Toxostoma curvirostre*, “fla”=*Auriparus flaviceps*, “fus”=*Melozona fusca*, “mel”=*Poliophtila melanura*,  
657 “nit”=*Phainopepla nitens*, “sin”=*Cardinalis sinuatus*).  
658

659 *Isolation across the landscape at different temporal resolutions*

660 We calculated IBD matrices by calculating the euclidean geographic distance between the  
661 latitude/longitude pair of each specimen in R. We used the WGS84 projection for all data. These  
662 variables were somewhat correlated with one another, though less so after accounting for  
663 geographic distance (Supplementary Figure 21).

664 To produce data for the IBH model, we calculated environmental resistances in the Last  
665 Glacial Maximum (LGM; ~21,000 years ago) for each species. To do this, we created ecological  
666 niche models (ENMs) using 19 layers representing contemporary climate (WorldClim; Hijmans  
667 et al., 2005) at a resolution of 2.5 arcminutes. We used MaxEnt (Phillips et al., 2006), with  
668 ENMeval version 0.3.1 as a wrapper function for model selection (Muscarella et al., 2014).  
669 ENMeval optimizes MaxEnt models based on different sets of feature classes and regularization  
670 values (see Supplementary Information). The contemporary ENMs (see IBE section below) were  
671 then backprojected to the LGM using WorldClim paleoclimate data (Hijmans et al., 2005). We  
672 also backprojected to the Mid-Holocene, but contemporary and Mid-Holocene ENMs were highly  
673 correlated, so we excluded the Mid-Holocene values from downstream analyses. We then scaled  
674 the LGM suitability values to range between 0–1 and calculated resistances across the environment  
675 using the least cost path distance method in ResistanceGA version 4.0–14 (Peterman et al., 2014,  
676 Peterman 2018). Regions of high resistance are predicted to reflect poor habitat and be costly to  
677 traverse through. The ENMs were thresholded to equal sensitivity-specificity values for  
678 visualization (Supplementary Figure 22).

679 We approximated IBB by assigning individuals based on their location relative to the  
680 Cochise Filter Barrier (see Supplementary Information). For proximity to the Cochise Filter  
681 Barrier, we assigned individuals to either Sonoran or Chihuahuan populations either based on the  
682 results of the K=2 clustering analysis, if there was structure across longitudes, or according to a  
683 cutoff of longitude if there was no structure. We chose 108 °W longitude as our cut off—  
684 individuals west of this point were deemed Sonoran, and individuals east of this point were deemed  
685 Chihuahuan (but see Provost et al., 2021). In some cases, species with genetic breaks had some  
686 uncertainty due to unsampled areas or admixed individuals—we labeled these individuals as being  
687 unclear with respect to their desert assignment. Georeferencing on some morphological specimens  
688 was poor, but all except two specimens (see Results) were identified at least to county level if not  
689 to a specific locality. When localities were given, we georeferenced the specimens to the nearest  
690 latitude/longitude. Otherwise, we assigned individuals to the centroid of their state or county.

691 We independently tested IBE by using two datasets: contemporary environmental distance  
692 and resistance. For the environmental distances, we used the 19 WorldClim bioclimatic layers (see  
693 IBH section). For the latitude/longitude location of each specimen used in both the morphological  
694 and genomic analysis, we extracted the values on those WorldClim layers and then calculated the  
695 euclidean distances in environmental space between specimens. This gave us an estimate of how  
696 different the environments were at each specimen's locality. For the environmental resistances, we  
697 created ENMs using the WorldClim layers, then added layers for soil properties, distance to water,  
698 terrain features, and vegetation, and occurrence data for the focal species (see Supplementary  
699 Information). We then calculated resistances and thresholded as described above.

700 To assess IBA, which had a temporal scale of the last 50 years, we obtained abundance  
701 information from the Breeding Bird Survey (Pardieck et al., 2019). This dataset consists of  
702 replicated transects where individual birds are counted across the whole of the United States. The  
703 methodology for counting is standardized and covers multiple decades of observations, with our  
704 dataset comprising data from 1966–2018. We downloaded raw data for all points, then subsetted

705 our data to our ten focal species. We averaged the number of individuals across years (though  
706 some points only had a single year). We then interpolated across points using inverse distance  
707 weighted interpolation in the spatstat version 2.1-0 package in R (idp=5). The interpolations were  
708 converted to rasters with extents and resolutions matching those of the ENMs. We then calculated  
709 resistances such that regions of high abundance had low resistance, to generate an abundance  
710 distance matrix between individuals.

711

### 712 *Generalized dissimilarity matrix models*

713 We assessed the relative effect of alternative spatial models on intraspecific variation in  
714 our focal species by building generalized dissimilarity matrix models (GDMs). As spatial layers  
715 representing our five models, we calculated geographic distances, abundance resistances,  
716 environmental distance and resistance, separation by barrier, and paleoenvironmental resistance  
717 between all individuals in each species. The models represent different temporal resolutions, with  
718 IBH spanning millions to tens of thousands of years ago, IBD spanning thousands to tens of years,  
719 IBE spanning hundreds to tens of years, IBA spanning tens to single years, and IBB describing the  
720 present-day configuration of the barrier. These predictors served as the input parameters for our  
721 GDMs and will be discussed in detail below. With our numerous response matrices (four  
722 morphological matrices, three genome matrices for each missing data cutoff, 35 matrices for  
723 chromosomes, five matrices for the lostruct partitions, and six matrices for the  $F_{ST}$  outliers with  
724 missing data cutoffs) and our six predictor matrices (with two for IBE: environmental distance,  
725 environmental resistance), we generated generalized dissimilarity matrix models using the gdm  
726 package version 1.3.11 in R (Manion et al., 2018). We tested which of IBA, IBB, IBD, IBE, IBH,  
727 or a combination best explained the variation in the response matrix (see below). Not all species  
728 had all chromosomes sequenced, and not all models converged: we have omitted those data. For  
729 each of the 45 response matrices per species, we built a univariate model where the  
730 genomic/chromosomal variable was predicted solely by one of the six predictor matrices. We also  
731 built models with combinations of two (bivariate) or three variables (trivariate), which we present  
732 in the Supplementary Information. Further, we present the GDM results for the chromosomes in  
733 the supplementary information. We compared the models based on the highest percent deviance  
734 explained.

735 To identify any overarching patterns with respect to which model of landscape evolution  
736 best explained genetic diversity (Supplementary Figure 23), we calculated four summary statistics  
737 for each chromosome, each lostruct and  $F_{ST}$  outlier partition, and the genome as a whole. We tested  
738 whether genomic summary statistics on each chromosome ( $F_{ST}$ ,  $D_{XY}$ , missing data, recombination  
739 rate) were correlated with explained percent deviance with an analysis of variance (ANOVA) test  
740 and a Tukey's honest significant difference test (Chambers et al., 1992, Miller 1981, Yandell 1997)  
741 using the stats v. 3.6.1 package in R. We did this for the complete dataset; for 75% and 50%  
742 missing data datasets, see Supplementary Information. We also calculated linear models  
743 comparing the proportion of each model to species-wide estimates of habitat suitability across the  
744 barrier. For all significance tests, we used an alpha value of 0.05 as our significance cutoff.

745 We evaluated whether the best-predictors of genomic landscapes varied across species and  
746 across partitions of the data using Chi-squared tests of significance, via the chisq.test function in  
747 the stats package in R. For each, the expected distributions assuming no differences between  
748 species, partitions, or structure were calculated and compared to the observed distributions. Chi-  
749 squared tests were performed both with and without Monte Carlo simulations (N=2000 simulations  
750 each repeated 1000 times).

751  
752  
753  
754  
755  
756  
757  
758  
759  
760  
761  
762  
763  
764  
765  
766  
767  
768  
769  
770  
771  
772  
773  
774  
775  
776  
777  
778  
779  
780  
781  
782  
783  
784  
785  
786  
787  
788  
789  
790  
791  
792  
793  
794  
795

## Acknowledgements

This work would not have been possible without generous specimen loans from DMNH (J. Woods), UWBM (R. Faucett, J. Klicka, S. Birks), UMMZ (J. Hinshaw, B. Benz), TCWC (G. Voelker), MSB (M. L. Campbell, M. Andersen, C. Witt, A. Johnson, J. McCullough), LSUMZ (D. Dittmann, F. Sheldon), CUMV (V. Rohwer, C. Dardia), AMNH (P. Sweet, P. Capainolo, B. Bird, T. Trombone). We are grateful to numerous State and Federal Collection Permit officers, and many BLM managers (T. Schnell, S. Cooke, M. McCabe, J. Atkinson, M. Daehler, S. Torrez, D. Tersey). Thanks to staff at Dalquest Desert Research Station (N. Horner) and Indio Mountains Research Station (J. Johnson). We thank M. Ingala for illustrating the birds used in many of our figures and for helpful feedback. Helpful input comes from the Smith Lab, S. Simpson, L. Musher, D. Fletcher, F. Burbrink, L. Alter, D. Kelly, I. Overcast, A. Xue, M. Hickerson, M. Blair, P. Galante, R. Harbert, E. Sterling, A. Xue, and E. Myers., the Underrepresented Genders in Museum Ornithology group, and the B. Carstens lab. This work was funded by the AMNH Frank M. Chapman Fund, American Ornithological Society, Society of Systematic Biologists, RGGG Sydney Anderson Travel Award, AMNH Linda H. Gormezano Fund, and AMNH RGGG Graduate Fellowship. BTS was supported by US NSF award DEB-1655736.

## Data Availability

These custom functions were deposited into a custom R package, `subspLabelR`, which is available at [github.com/kaiyaprovost/subspLabelR](https://github.com/kaiyaprovost/subspLabelR), and scripts used to perform these analyses are found at [github.com/kaiyaprovost/whole\\_genome\\_pipeline](https://github.com/kaiyaprovost/whole_genome_pipeline). All data used to perform analyses will be available on Dryad upon acceptance.

## References

- Adrion JR, Galloway JG, Kern AD. 2020. Predicting the landscape of recombination using deep learning. *Molecular Biology and Evolution*. 37:1790-1808.
- Aguillon SM, Walsh J, Lovette IJ. 2021. Extensive hybridization reveals multiple coloration genes underlying a complex plumage phenotype. *Proc Royal Soc B*. 288:20201805.
- Backstrom N, Karaiskou N, Leder EH, Gustafsson L, Primmer CR, Qvarnström A, Ellegren H. 2008. A gene-based genetic linkage map of the collared flycatcher (*Ficedula albicollis*) reveals extensive synteny and gene-order conservation during 100 million years of avian evolution. *Genetics*. 179:1479-1495.
- Barker FK, Burns KJ, Klicka J, Lanyon SM, Lovette IJ. 2015. New insights into New World biogeography: An integrated view from the phylogeny of blackbirds, cardinals, sparrows, tanagers, warblers, and allies. *The Auk: Ornithological Advances*. 132:333-348.
- Barrowclough GF, Groth JG, Mertz LA, Gutierrez RJ. 2005. Genetic structure, introgression, and a narrow hybrid zone between northern and California spotted owls (*Strix occidentalis*). *Molecular Ecology*. 14:1109-1120.
- Barton NH, Hewitt, GM. 1981. Hybrid zones and speciation. *Evolution and Speciation*. 109-145.
- Benzer S. 1961. On the topography of the genetic fine structure. *Proceedings of the National Academy of Sciences of the United States of America*. 47:403.
- Berg PR, Jentoft S, Star B, Ring KH, Knutsen H, Lien S, Jakobsen KS, Andre C. 2015. Adaptation to low salinity promotes genomic divergence in Atlantic cod (*Gadus morhua* L.). *Genome Biology and Evolution*. 7:1644-1663.

- 796 Betancourt AJ, Presgraves DC. 2002. Linkage limits the power of natural selection in *Drosophila*.  
797 *Proceedings of the National Academy of Sciences*. 99:13616-13620.
- 798 Branch CL, Jahner JP, Kozlovsky DY, Parchman TL, Pravosudov VV. 2017. Absence of  
799 population structure across elevational gradients despite large phenotypic variation in  
800 mountain chickadees (*Poecile gambeli*). *Royal Society Open Science*. 4:170057.
- 801 Burbrink FT, Gehara M, McKelvy AD, Myers EA. 2021. Resolving spatial complexities of  
802 hybridization in the context of the gray zone of speciation in North American ratsnakes  
803 (*Pantherophis obsoletus* complex). *Evolution*. 75:260-277.
- 804 Burney CW, Brumfield RT. 2009. Ecology predicts levels of genetic differentiation in Neotropical  
805 birds. *The American Naturalist*. 174(3):358-368.
- 806 Chambers JM, Freeny AE, Heiberger RM. 1992. Analysis of variance. In Chambers JM, Hastie  
807 TJ, editors. *Statistical Models in S*. Pacific Grove (CA): Wadsworth and Brooks/Cole. p.  
808 145–194.
- 809 Danecek P, Auton A, Abecasis G, Albers CA, Banks E, DePristo MA, Handsaker RE, Lunter G,  
810 Marth GT, Sherry ST, McVean, G. 2011. The variant call format and VCFtools.  
811 *Bioinformatics*. 27:2156-2158.
- 812 DePristo MA, Banks E, Poplin R, Garimella KV, Maguire JR, Hartl C, Philippakis AA, Del Angel  
813 G, Rivas MA, Hanna M, et al. 2011. A framework for variation discovery and genotyping  
814 using next-generation DNA sequencing data. *Nature Genetics*. 43:491.
- 815 Derryberry EP, Derryberry GE, Maley JM, Brumfield RT. 2014. HZAR: hybrid zone analysis  
816 using an R software package. *Molecular Ecology Resources*. 14:652-663.
- 817 Dubuc-Messier G, Réale D, Perret P, Charmantier, A. 2017. Environmental heterogeneity and  
818 population differences in blue tits personality traits. *Behavioral Ecology*. 28:448-459.
- 819 Duntsch L, Tomotani BM, de Villemereuil P, Brekke P, Lee KD, Ewen JG, Santure AW. 2020.  
820 Polygenic basis for adaptive morphological variation in a threatened Aotearoa | New  
821 Zealand bird, the hihi (*Notiomystis cincta*). *Proc Royal Soc B*. 287:20200948.
- 822 Ellegren H, Smeds L, Burri R, Olason PI, Backström N, Kawakami T, Künstner A, Mäkinen H,  
823 Nadachowska-Brzyska K, Qvarnström A, et al. 2012. The genomic landscape of species  
824 divergence in *Ficedula* flycatchers. *Nature*. 491:756-760.
- 825 Fumagalli M, Vieira FG, Linderoth T, Nielsen R. 2014. ngsTools: methods for population genetics  
826 analyses from next-generation sequencing data. *Bioinformatics*. 30:1486-1487.
- 827 Gamboa MP, Ghalambor CK, Sillett TS, Morrison SA, Funk WC. 2021. Adaptive divergence in  
828 bill morphology and other thermoregulatory traits is facilitated by restricted gene flow in  
829 song sparrows on the California Channel Islands. *Molecular Ecology*. 00:1-17.
- 830 Gibb GC, England R, Hartig G, McLenachan PA, Taylor-Smith BL, McComish BJ, Cooper A,  
831 Penny D. 2015. New Zealand passerines help clarify the diversification of major songbird  
832 lineages during the Oligocene. *Genome Biology and Evolution*. 7:2983-2995.
- 833 Grabherr MG, Russell P, Meyer M, Mauceli E, Alföldi J, Di Palma F, Lindblad-Toh K. 2010.  
834 Genome-wide synteny through highly sensitive sequence alignment: Satsuma.  
835 *Bioinformatics*. 26:1145-1151.
- 836 Han F, Lamichhaney S, Grant BR, Grant PR, Andersson L, Webster MT. 2017. Gene flow, ancient  
837 polymorphism, and ecological adaptation shape the genomic landscape of divergence  
838 among Darwin's finches. *Genome Res*. 27:1004-1015.
- 839 Harris RB, Alström P, Ödeen A, Leaché AD. 2018. Discordance between genomic divergence and  
840 phenotypic variation in a rapidly evolving avian genus (*Motacilla*). *Molecular*  
841 *Phylogenetics and Evolution*. 120:183-195.

- 842 Hewitt GM. 1989. The subdivision of species by hybrid zones. In: Otte D, Endler J, editors.  
843 Speciation and its Consequences. Sunderland (MA): Sinauer Associates. p. 85-110.
- 844 Hijmans RJ, Cameron SE, Parra JL, Jones PG, Jarvis A. 2005. Very high resolution interpolated  
845 climate surfaces for global land areas. *International Journal of Climatology*. 25:1965-  
846 1978.
- 847 Ho J, Tumkaya T, Aryal S, Choi H, Claridge-Chang A. 2019. Moving beyond P values: data  
848 analysis with estimation graphics. *Nature Methods*. 16:565-566.
- 849 Hodgkinson A, Eyre-Walker A. 2011. Variation in the mutation rate across mammalian genomes.  
850 *Nature Reviews Genetics*. 12:756-766.
- 851 Holmgren CA, Norris J, and Betancourt JL. 2007. Inferences about winter temperatures and  
852 summer rains from the late Quaternary record of C4 perennial grasses and C3 desert shrubs  
853 in the northern Chihuahuan Desert. *Journal of Quaternary Science: Published for the*  
854 *Quaternary Research Association*. 22:141-161.
- 855 Hooper DM, Price TD. 2017. Chromosomal inversion differences correlate with range overlap in  
856 passerine birds. *Nature Ecology Evolution*, 1:1526-1534.
- 857 Jun G, Wing MK, Abecasis GR, Kang HM. 2015. An efficient and scalable analysis framework  
858 for variant extraction and refinement from population-scale DNA sequence data. *Genome*  
859 *Res*, 25:918-925.
- 860 Kamvar ZN, Tabima JF, Grünwald NJ. 2014. Poppr: an R package for genetic analysis of  
861 populations with clonal, partially clonal, and/or sexual reproduction. *PeerJ*. 2:e281.
- 862 Kamvar ZN, Brooks JC, Grünwald NJ. 2015. Novel R tools for analysis of genome-wide  
863 population genetic data with emphasis on clonality. *Frontiers in Genetics*. 6:208
- 864 Kirkpatrick M. 2017. The evolution of genome structure by natural and sexual selection. *Journal*  
865 *of Heredity*. 108: 3-11.
- 866 Klicka LB, Kus BE, Burns KJ. 2016. Conservation genomics reveals multiple evolutionary units  
867 within Bell's Vireo (*Vireo bellii*). *Conservation Genetics*. 17:455-471.
- 868 Knief U, Schielzeth H, Backström N, Hemmrich-Stanisak G, Wittig M, Franke A, Griffith SC,  
869 Ellegren H, Kempnaers B, Forstmeier W. 2017. Association mapping of morphological  
870 traits in wild and captive zebra finches: reliable within, but not between populations.  
871 *Molecular Ecology*. 26:1285-1305.
- 872 Korneliussen TS, Albrechtsen A, Nielsen R. 2014. ANGSD: analysis of next generation  
873 sequencing data. *BMC Bioinformatics*. 15:356.
- 874 Kumar S, Stecher G, Suleski M, Hedges SB. 2017. TimeTree: a resource for timelines, timetrees,  
875 and divergence times. *Molecular Biology and Evolution*. 34:1812-1819.
- 876 Laine VN, Gossmann TI, Schachtschneider KM, Garroway CJ, Madsen O, Verhoeven KJ, De  
877 Jager V, Megens HJ, Warren WC, Minx P, et al. 2016. Evolutionary signals of selection  
878 on cognition from the great tit genome and methylome. *Nature Communications*. 7:1-9.
- 879 Langley C H, Stevens K, Cardeno C, Lee Y C, Schrider DR, Pool JE, Langley SA, Suarez C,  
880 Corbett-Detig RB, Kolaczkowski B, et al. 2012. Genomic variation in natural populations  
881 of *Drosophila melanogaster*. *Genetics*. 192:533–598.
- 882 Li H. 2011. A statistical framework for SNP calling, mutation discovery, association mapping and  
883 population genetical parameter estimation from sequencing data. *Bioinformatics*. 27:2987-  
884 2993.
- 885 Li H, Durbin R. 2009. Fast and accurate short read alignment with Burrows–Wheeler transform.  
886 *Bioinformatics*. 25:1754-1760.



- 887 Li H, Durbin R. 2010. Fast and accurate long-read alignment with Burrows–Wheeler transform.  
888 *Bioinformatics*. 26:589-595.
- 889 Li H, Ralph P. 2019. Local PCA shows how the effect of population structure differs along the  
890 genome. *Genetics*. 211:289-304.
- 891 Li H, Handsaker B, Wysoker A, Fennell T, Ruan J, Homer N, Marth G, Abecasis G, Durbin R.  
892 2009. The sequence alignment/map format and SAMtools. *Bioinformatics*. 25:2078-2079.
- 893 Manion G, Lisk M, Ferrier S, Nieto-Lugilde D, Mokany K, Fitzpatrick MC. 2018. gdm:  
894 Generalized dissimilarity modeling. R package version, 1(11).
- 895 Mank JE, Vicoso B, Berlin S, Charlesworth B. 2010. Effective population size and the Faster-X  
896 effect: Empirical results and their interpretation. *Evolution*. 64:663-674.
- 897 Manthey JD, Klicka J, Spellman GM. 2021. The genomic signature of allopatric speciation in a  
898 songbird is shaped by genome architecture (Aves: *Certhia americana*). *Genome Biology*  
899 *and Evolution*. 13(8):evab120.
- 900 Manthey JD, Moyle RG. 2015. Isolation by environment in White-breasted Nuthatches (*Sitta*  
901 *carolinensis*) of the Madrean Archipelago sky islands: a landscape genomics approach.  
902 *Molecular Ecology*. 24:3628-3638.
- 903 Martin SH, Jiggins CD. 2017. Interpreting the genomic landscape of introgression. *Current*  
904 *Opinion in Genetics & Development*. 47:69-74.
- 905 Mason NA, Burns KJ. 2013. Molecular phylogenetics of the Neotropical seedeaters and seed-  
906 finches (*Sporophila*, *Oryzoborus*, *Dolospingus*). *Ornitología Neotropical*. 24:139-155.
- 907 Mayr E. 1942. Systematics and the origin of species, from the viewpoint of a zoologist. New York:  
908 Columbia University Press.
- 909 McKenna A, Hanna M, Banks E, Sivachenko A, Cibulskis K, Kernytsky A, Garimella K, Altshuler  
910 D, Gabriel S, Daly M, et al. 2010. The Genome Analysis Toolkit: a MapReduce framework  
911 for analyzing next-generation DNA sequencing data. *Genome Res*. 20(9):1297-1303.
- 912 Meisner J, Albrechtsen A. 2018. Inferring population structure and admixture proportions in low-  
913 depth NGS data. *Genetics*. 210:719-731.
- 914 Miles LS, Rivkin LR, Johnson MT, Munshi-South J, Verrelli BC. 2019. Gene flow and genetic  
915 drift in urban environments. *Molecular Ecology*. 28:4138-4151.
- 916 Miller RG. 1981. Simultaneous Statistical Inference. New York: Springer.
- 917 Mitchell KJ, Wood JR, Llamas B, McLenachan PA, Kardailsky O, Scofield RP, Worthy TH,  
918 Cooper A. 2016. Ancient mitochondrial genomes clarify the evolutionary history of New  
919 Zealand’s enigmatic acanthisittid wrens. *Molecular Phylogenetics and Evolution*. 102:295-  
920 304.
- 921 Morafka DJ. 1977. A Biogeographical Analysis of the Chihuahuan Desert through its  
922 Herpetofauna. Dordrecht: Springer.
- 923 Moreira LR, Hernández-Baños, BE, Smith BT. 2020. Spatial predictors of genomic and  
924 phenotypic variation differ in a lowland Middle American bird (*Icterus gularis*). *Molecular*  
925 *Ecology*. 29(16):3084-3101.
- 926 Muscarella R, Galante PJ, Soley-Guardia M, Boria RA, Kass JM, Uriarte M, Anderson RP. 2014.  
927 ENM eval: An R package for conducting spatially independent evaluations and estimating  
928 optimal model complexity for Maxent ecological niche models. *Methods in Ecology and*  
929 *Evolution*. 5:1198-1205.
- 930 Myers EA, Xue AT, Gehara M, Cox CL, Davis Rabosky AR, Lemos-Espinal J, Martínez-Gómez  
931 JE, Burbrink FT. 2019. Environmental heterogeneity and not vicariant biogeographic

- 932 barriers generate community-wide population structure in desert-adapted snakes.  
933 *Molecular Ecology*. 28(20):4535-4548.
- 934 Normand P, Lapierre P, Tisa LS, Gogarten JP, Alloisio N, Bagnarol E, Bassi CA, Berry AM,  
935 Bickhart DM, Choisne N, et al. 2007. Genome characteristics of facultatively symbiotic  
936 *Frankia sp.* strains reflect host range and host plant biogeography. *Genome Res.* 17(1):7-  
937 15.
- 938 Nosil P, Schluter D. 2011. The genes underlying the process of speciation. *Trends in Ecology &*  
939 *Evolution*. 26:160-167.
- 940 Nuvoloni FM, Feres RJ. F., Gilbert B. 2016. Species turnover through time: colonization and  
941 extinction dynamics across metacommunities. *The American Naturalist*. 187:786-796.
- 942 Pardieck KL, Ziolkowski Jr DJ, Lutmerding M, Aponte V, Hudson MA. R. 2019. North American  
943 Breeding Bird Survey Dataset 1966–2018, version 2018.0. US Geological Survey,  
944 Patuxent Wildlife Research Center, Laurel, MD.
- 945 Pasquet E, Barker FK, Martens J, Tillier A, Cruaud C, Cibois A. 2014. Evolution within the  
946 nuthatches (Sittidae: Aves, Passeriformes): molecular phylogeny, biogeography, and  
947 ecological perspectives. *Journal of Ornithology*. 155:755-765.
- 948 Paz A, Ibáñez R, Lips KR, Crawford AJ. 2015. Testing the role of ecology and life history in  
949 structuring genetic variation across a landscape: A trait-based phylogeographic approach.  
950 *Molecular Ecology*. 24(14):3723-3737.
- 951 Peterman WE. 2018. ResistanceGA: An R package for the optimization of resistance surfaces  
952 using genetic algorithms. *Methods in Ecology and Evolution*. 9:1638-1647.
- 953 Peterman WE, Connette GM, Semlitsch RD, Eggert LS. 2014. Ecological resistance surfaces  
954 predict fine-scale genetic differentiation in a terrestrial woodland salamander. *Molecular*  
955 *Ecology*. 23:2402-2413.
- 956 Phillips OL. 1996. Long-term environmental change in tropical forests: increasing tree turnover.  
957 *Environmental Conservation*. 23(3):235-248.
- 958 Phillips SJ, Anderson RP, Schapire RE. 2006. Maximum entropy modeling of species geographic  
959 distributions. *Ecological Modelling*, 190:231-259.
- 960 Price TD, Hooper DM, Buchanan CD, Johansson US, Tietze DT, Alström P, Olsson U, Ghosh-  
961 Harihar M, Ishtiaq F, Gupta SK, et al. 2014. Niche filling slows the diversification of  
962 Himalayan songbirds. *Nature*. 509(7499):222-225.
- 963 Probst CM, Ralston J, Bentley I. 2021. Effects of climate on bill morphology within and across  
964 *Toxostoma* thrashers. *Journal of Avian Biology*.
- 965 Provost KL, Myers EA, Smith BT. 2021. Community phylogeographic patterns reveal how a  
966 barrier filters and structures taxa in North American warm deserts. *Journal of*  
967 *Biogeography*. 48:1267-1283.
- 968 R Core Team. 2019. R: a language and environment for statistical computing, version 3.0.2.  
969 Vienna, Austria: R Foundation for Statistical Computing; 2013.
- 970 Ralston J, FitzGerald AM, Burg TM, Starkloff NC, Warkentin IG, Kirchman JI. 2021.  
971 Comparative phylogeographic analysis suggests a shared history among eastern North  
972 American boreal forest birds. *The Auk* 138(3): ukab018.
- 973 Ravinet M, Faria R, Butlin RK, Galindo J, Bierne N, Rafajlović M, Noor MAF, Mehlig B,  
974 Westram AM. 2017. Interpreting the genomic landscape of speciation: a road map for  
975 finding barriers to gene flow. *Journal of Evolutionary Biology*. 30(8):1450-1477.

- 976 Reynolds J.F., Kemp P.R., Ogle K, Fernández RJ. 2004. Modifying the ‘pulse-reserve’ Paradigm  
977 for deserts of North America: precipitation pulses, soil water, and plant responses.  
978 *Oecologia*. 141:194-210.
- 979 Ribeiro ÂM, Puetz L, Pattinson NB, Dalén L, Deng Y, Zhang G, da Fonseca RR, Smit B, Gilbert  
980 MTP. 2019. 31° South: the physiology of adaptation to arid conditions in a passerine bird.  
981 *Molecular Ecology*. 28(16):3709-3721.
- 982 Robinson DF, Foulds LR. 1981. Comparison of phylogenetic trees. *Mathematical Biosciences*.  
983 53:131-147.
- 984 Rojas-Soto OR. 2003. Geographic variation of the curve-billed thrasher (*Toxostoma curvirostre*)  
985 complex. *The Auk*. 120:311-322.
- 986 Rojas-Soto OR, De Los Monteros AE, Zink RM. 2007. Phylogeography and patterns of  
987 differentiation in the curve-billed thrasher. *The Condor*. 109:456-463.
- 988 Romanov MN, Dodgson JB, Gonser RA, Tuttle, EM. 2011. Comparative BAC-based mapping in  
989 the white-throated sparrow, a novel behavioral genomics model, using interspecies overgo  
990 hybridization. *BMC Research Notes*. 4(1):1-13.
- 991 Sæther SA, Sætre GP, Borge T, Wiley C, Svedin N, Andersson G,... Qvarnström A. 2007. Sex  
992 chromosome-linked species recognition and evolution of reproductive isolation in  
993 flycatchers. *Science*. 318:95-97.
- 994 Shafer AB, Cullingham CI, Cote SD, Coltman DW. Of glaciers and refugia: a decade of study  
995 sheds new light on the phylogeography of northwestern North America. 2010. *Molecular*  
996 *Ecology* 19(21):4589-4621.
- 997 Shreve F. 1942. The desert vegetation of North America. *The Botanical Review*. 8:195-246.
- 998 Sin SYW., Lu L, Edwards SV. 2020. De Novo assembly of the northern cardinal (*Cardinalis*  
999 *cardinalis*) genome reveals candidate regulatory regions for sexually dichromatic red  
1000 plumage coloration. *G3: Genes/Genomes/Genetics*. 10(10):3541-3548.
- 1001 Singhal S, Leffler EM, Sannareddy K, Turner I, Venn O, Hooper DM, Strand AI, Li Q, Raney B,  
1002 Balakrishnan CN, et al. 2015. Stable recombination hotspots in birds. *Science*.  
1003 350(6263):928-932.
- 1004 Smith BT, Smith BT, Bryson Jr RW, Mauck III WM, Chaves J, Robbins MB, Aleixo A, Klicka J.  
1005 2018. Species Delimitation and Biogeography of the Gnatcatchers and Gnatwrens (Aves:  
1006 Polioptilidae). *Molecular Phylogenetics and Evolution*. 126: 45-57.
- 1007 Smith BT, Escalante P, Baños BEH, Navarro-Sigüenza AG, Rohwer S, Klicka J. 2011. The role  
1008 of historical and contemporary processes on phylogeographic structure and genetic  
1009 diversity in the Northern Cardinal, *Cardinalis cardinalis*. *BMC Evolutionary Biology*.  
1010 11:136.
- 1011 Spencer JE. 1996. Uplift of the Colorado Plateau due to lithosphere attenuation during Laramide  
1012 low-angle subduction. *Journal of Geophysical Research: Solid Earth*. 101:13595-13609.
- 1013 Teutimez MR. 2012. The cactus wren (*Campylorhynchus brunneicapillus*) in southern California:  
1014 haplotype comparisons among coastal and inland populations. Long Beach (CA):  
1015 California State University.
- 1016 Toews DP, Taylor SA, Vallender R, Brelsford A, Butcher BG, Messer PW, Lovette IJ. 2016.  
1017 Plumage genes and little else distinguish the genomes of hybridizing warblers. *Current*  
1018 *Biology*. 26:2313-2318.
- 1019 Turbek SP, Browne M, Di Giacomo AS, Kopuchian C, Hochachka WM, Estalles C, Lijtmaer DA,  
1020 Tubaro PL, Silveira LF, Lovette IJ, et al. 2021. Rapid speciation via the evolution of pre-  
1021 mating isolation in the Iberá Seedeater. *Science*. 371(6536):1312-1312.

- 1022 Van der Auwera GA, Carneiro MO, Hartl C, Poplin R, Del Angel G, Levy-Moonshine A, Jordan  
1023 T, Shakir K, Roazen D, Thibault J, et al. 2013. From FastQ data to high-confidence variant  
1024 calls: the genome analysis toolkit best practices pipeline. *Current Protocols in*  
1025 *Bioinformatics*. 43:11-10.
- 1026 Van Devender TR. 1990. Late quaternary vegetation and climate of the Sonoran Desert, United  
1027 States and Mexico. In Betancourt JL, Van Devender TR, Martin PS, editors. *Packrat*  
1028 *middens: the last 40,000 years of biotic change*. Tucson (AZ): University of Arizona Press.  
1029 p. 134-165.
- 1030 Van Devender TR, Betancourt JL, Wimberly M. 1984. Biogeographic implications of a packrat  
1031 midden sequence from the Sacramento Mountains, south-central New Mexico. *Quaternary*  
1032 *Research*. 22(3):344-360.
- 1033 Vasconcellos MM, Colli GR, Weber JN, Ortiz EM, Rodrigues MT, Cannatella DC. 2019. Isolation  
1034 by instability: Historical climate change shapes population structure and genomic  
1035 divergence of treefrogs in the Neotropical Cerrado savanna. *Molecular Ecology*.  
1036 28(7):1748-1764.
- 1037 Wang IJ, Bradburd GS. 2014. Isolation by environment. *Molecular Ecology*. 23:5649-5662.
- 1038 Wang J, Street NR, Park EJ, Liu J, Ingvarsson PK. 2020. Evidence for widespread selection in  
1039 shaping the genomic landscape during speciation of *Populus*. *Molecular Ecology*.  
1040 29(6):1120-1136.
- 1041 Weckworth BV, Musiani M, DeCesare NJ, McDevitt AD, Hebblewhite M, Mariani S. 2013.  
1042 Preferred habitat and effective population size drive landscape genetic patterns in an  
1043 endangered species. *Proc Royal Soc B: Biological Sciences*. 280:20131756.
- 1044 Williams D, Gogarten JP, Lapierre P. 2010. Filling the gaps in the genomic landscape. *Genome*  
1045 *Biology*. 11(2):1-2.
- 1046 Wingett SW, Andrews S. 2018. FastQ Screen: A tool for multi-genome mapping and quality  
1047 control. *F1000 Research*. 7:1338.
- 1048 Wright S. 1943. Isolation by distance. *Genetics*. 28(2):114.
- 1049 Yandell BS. 1997. *Practical data analysis for designed experiments*. New York: Chapman &  
1050 Hall/CRC.
- 1051 Yi X, Latch EK. 2021. Nonrandom missing data can bias Principal Component Analysis inference  
1052 of population genetic structure. *Molecular Ecology Resources*. 00:1-10.
- 1053 Yusuf L, Heatley MC, Palmer JP, Barton HJ, Cooney CR, Gossmann TI. 2020. Noncoding regions  
1054 underpin avian bill shape diversification at macroevolutionary scales. *Genome Res*.  
1055 30:553-565.
- 1056 Zamudio KR, Bell RC, Mason NA. 2016. Phenotypes in phylogeography: Species' traits,  
1057 environmental variation, and vertebrate diversification. *Proceedings of the National*  
1058 *Academy of Sciences*. 113:8041-8048.
- 1059 Zhang G, Li C, Li Q, Li B, Larkin DM, Lee C, Storz JF, Antunes A, Greenwold MJ, Meredith  
1060 RW, et al. (2014). Comparative genomics reveals insights into avian genome evolution and  
1061 adaptation. *Science*. 346(6215):1311-1320.
