Article (Discoveries)

1  
2  
3  
4  
5  
6  
7  
8  
9  
10  
11  
12  
13  
14  
15  
16  
17  
18  
19  
20

### **The genomic landscapes of desert birds form over multiple time scales**

Authors: Kaiya Provost<sup>1,2,3,\*</sup>, Stephanie Yun Shue<sup>4,5</sup>, Meghan Forcellati<sup>4,6</sup>, Brian Tilston Smith<sup>1</sup>

<sup>1</sup> Department of Ornithology, American Museum of Natural History, New York, New York, USA

<sup>2</sup> Richard Gilder Graduate School, American Museum of Natural History, New York, New York, USA

<sup>3</sup> Evolution, Ecology and Organismal Biology, The Ohio State University, Columbus, Ohio, USA

<sup>4</sup> Bergen County Academies, Hackensack, New Jersey, USA

<sup>5</sup> Biological Sciences, University of California Berkeley, Berkeley, California, USA

<sup>6</sup> Ecology, Evolution, and Environmental Biology, Columbia University, New York, New York, USA

\*Corresponding author: Kaiya L. Provost, [provost.27@osu.edu](mailto:provost.27@osu.edu), Department of Evolution, Ecology and Organismal Biology, The Ohio State University. 318 W. 12th Ave. 300 Aronoff Laboratory Columbus, OH 43210, USA

21 **Abstract**

22         Spatial models show that genetic differentiation between populations can be explained by  
23 factors ranging from geographic distance to environmental resistance across the landscape.  
24 However, genomes exhibit a landscape of differentiation, which could indicate that multiple spatial  
25 models better explain divergence in different portions of the genome. We test whether alternative  
26 geographic predictors of intraspecific differentiation vary across the genome in ten bird species  
27 that co-occur in Sonoran and Chihuahuan Deserts of North America. Using population-level  
28 genomic data, we characterized the genomic landscapes across species and modeled five predictors  
29 that represented historical and contemporary mechanisms. The characteristics of genomic  
30 landscapes differed across the ten species, influenced by varying levels of population structuring  
31 and admixture between deserts. General dissimilarity matrix modeling indicated that the best-fit  
32 models differed from the whole genome and partitions along the genome. Almost all of the  
33 historical and contemporary mechanisms were important in explaining genetic distance, but  
34 particularly historical and contemporary environment, while contemporary abundance, position of  
35 the barrier to gene flow, and distance explained relatively less. Individual species have  
36 significantly different patterns of genomic variation. These results illustrate that the genomic  
37 landscape of differentiation was influenced by alternative geographic factors operating on different  
38 portions of the genome.

39

40

## 41 **Introduction**

42           Levels of nucleotide diversity and the degree of differentiation both vary across genomes  
43 (e.g., Ellegren et al., 2012; Li and Ralph, 2019). These so-called genomic landscapes are produced  
44 by variable processes including ones intrinsic to the genome (meiotic recombination, mutation)  
45 and those extrinsic (introgression, selection, and drift). Fluctuating levels of genetic diversity  
46 across the genome have been shown to be associated with recombination rate indicating that linked  
47 selection reduces variation (Burri et al., 2015, Martin et al., 2019, Johri et al., 2020). Likewise  
48 mutation rates and coalescent times are all known to covary with levels of differentiation across  
49 the genome (Nosil and Schluter, 2011; Benzer, 1961; Hodgkinson and Eyre-Walker, 2011). In  
50 contrast to intrinsic processes which are primarily mediated by genomic properties, extrinsic  
51 processes are mediated through interactions with the adaptive and demographic factors operating  
52 across space. The locations of speciation genes are found to be associated with genomic  
53 differentiation (Nosil and Schluter, 2011; Benzer, 1961; Hodgkinson and Eyre-Walker, 2011).  
54 Despite evidence of the patterns and processes driving a heterogeneous genomic landscape (e.g.,  
55 Li and Ralph, 2019, Wang et al., 2020), studies examining the geographic predictors of genetic  
56 differentiation often use only single summary statistics to represent the entirety of the genome, for  
57 example using a single  $F_{ST}$  value for comparing whole populations. Clarifying the relationship  
58 between the heterogeneity of the genomic landscape and geographic predictors of differentiation  
59 will elucidate how intraspecific variation arises in the complex physical landscape.

60           The spatial processes attributed to population differentiation operate over historical  
61 through contemporary time scales; herein, we focus on five as examples. An atemporal  
62 manifestation of historical isolation, such as isolation by barrier(s) (IBB; *sensu* Mayr, 1942) can  
63 occur, where population differentiation is best predicted by a landscape feature. Over shallower  
64 evolutionary scales, non-random mating with individuals in closer geographic proximity can cause  
65 genetic differentiation by isolation by distance (IBD; Wright, 1943). IBD has been shown to  
66 impact taxa at both small (e.g., Aguillon et al., 2017) and large geographic scales (e.g., Rethelford,  
67 2004). Geographic distances alone may not be the best predictors of differentiation because  
68 adaptation to local climatic conditions causes selection to generate structuring across  
69 environmental gradients, which is known as isolation by environment (IBE; Wang and Bradburd,  
70 2014, Myers et al., 2019, Berg et al., 2015; Zamudio et al., 2016). These two factors have been  
71 shown to work concurrently with one another in many groups (Sexton et al., 2014). Because local

72 environmental conditions change rapidly, for example due to species turnover or succession  
73 (Phillips, 1996, Nuvoloni et al., 2016), associations between differentiation and environment are  
74 likely more recent phenomena than historical associations. The increased availability of ecological  
75 data for many organisms, such as census data, allows for testing even shallower associations with  
76 genetic structuring across the landscape. Contemporary demographic data can be used to test  
77 whether genetic differences are associated with abundance troughs that restrict gene flow (Barton  
78 and Hewitt, 1981; Hewitt, 1989; Barrowclough et al., 2005; referred to herein as “IBA” for  
79 brevity). Though it is often assumed that abundance and niche occupancy are correlated due to the  
80 link with suitable habitat (Holt, 2009), this is not necessarily borne out (Waldock et al., 2021) and  
81 as such we estimate these factors separately. Local population size is also known to be a strong  
82 driver of genetic structure, especially when compounded with environmental change determining  
83 local suitability (Weckworth et al., 2013). Finally, population history is often linked to Pleistocene  
84 glacial cycles that shifted and fragmented distributions. An association of genome-wide structuring  
85 linked to population fragmentation can be tested under a scenario where genetic distances are  
86 modeled against paleo-climatic suitability (Vasconcellos et al., 2019; Moreira et al., 2020; referred  
87 to herein as “IBH” for brevity).

88 While the focus of these models is often on genetic variation, they can also be applied to  
89 phenotypic variation (e.g., Moreira et al., 2020). Phenotypic variation is often the product of many  
90 loci with little effect (Zeng, 1994). As such, looking directly at phenotype can help reveal whether  
91 a particular process is associated with trait variance. Examining the genomic landscape in the  
92 context of these alternative geographic models will provide evidence for how factors of varying  
93 temporal resolutions influence the peaks and valleys of differentiation. To investigate how  
94 landscape features impact genotypic and phenotypic variation across space, we use an archetypical  
95 assemblage of co-distributed birds distributed across the Sonoran and Chihuahuan Deserts of the  
96 southwestern USA and northern Mexico.

97 Here we characterize the genomic landscapes of birds occurring across the Sonoran and  
98 Chihuahuan Deserts and test the relative effect of alternative geographic models in predicting  
99 patterns of intraspecific differentiation. To do this, we integrate population-level whole-genome  
100 resequencing, specimen-based morphometrics, and comparative sampling across ten co-  
101 distributed species that occur across the deserts. We hypothesize that the best-predictors of genetic  
102 diversity will vary across species and different partitions of the data, reflecting the multiple

103 extrinsic factors that structure variation across the genomic landscape (Supplementary Figure 1).  
104 Alternatively, species could show homogeneous patterns either by the same geographic modeling  
105 predicting differentiation in windows across the whole genome or by species exhibiting congruent  
106 genomic landscapes shaped by the same geographic barrier. We further evaluate whether summary  
107 statistics, reflective of alternative evolutionary processes, could explain alternative geographic  
108 predictors of genomic landscapes. This comparative framework will provide resolution to the  
109 extent at which peaks and valleys of the genomic landscape correspond to historical through  
110 contemporary factors.

111

## 112 **Results**

### 113 *Summary of Genomic Data*

114 We sequenced the genomes of 221 individuals across 10 focal species of passerine birds  
115 distributed in the Sonoran and Chihuahuan Deserts (Figure 1). Individuals varied in their coverage  
116 across the genome. We created three datasets to address this variation in downstream analyses: a  
117 complete dataset of all individuals, a dataset where individuals with greater than 75% missing base  
118 pairs were removed, and a dataset where individuals with greater than 50% missing base pairs  
119 were removed; we call these the 100%, 75%, and 50% missing data partitions, respectively. We  
120 found that the three missing data partitions did not vary substantially with respect to coverage at  
121 non-missing sites or number of SNPs. As such, here we describe the results for the complete dataset  
122 (for the 75% and 50% missing data partitions, see Supplementary Information). We recovered  
123 sequences with a mean coverage of 2.9 per individual (range 0.4–8.8), 6–25 million reads per  
124 individual, and 5–28 million SNPs per species. Mean X coverage within species ranged from 2.1x–  
125 4.2x, with *Phainopepla nitens* having the lowest coverage and *Melospiza fusca* the highest. The  
126 average missing data per species ranged from 48–64%. Across individuals, missing data ranged  
127 from 13–93% with a mean of 53% (Table 1).

128

### 129 *Recombination Rate*

130 Mean recombination rates for the entire genome estimated using ReLERNN (Adrion et al.,  
131 2020) ranged from  $8.9\text{--}12.8 \times 10^{-10}$  c/bp (where c is the probability of a crossover) across species.  
132 Correlations between species in mean recombination across chromosomes range from -0.57 to  
133 0.53 (mean $\pm$ SD 0.02 $\pm$ 0.25). Correlations between species in mean recombination at the same

134 genomic positions ranged from -0.33 to 0.43 (mean $\pm$ SD -0.01 $\pm$ 0.22). Recombination rate was not  
135 associated with log corrected chromosome size (p=0.82).

136

### 137 *Lostruct outliers and F<sub>ST</sub> outliers*

138 We divided the genome into three kinds of partitions. First, we analyzed chromosomes  
139 independently. Second, we identified high F<sub>ST</sub> outliers (by calculating the z-score of F<sub>ST</sub> values  
140 across the genome within species and retaining only those more than 5 standard deviations above  
141 the mean) and analyzed those. Finally, we performed a multidimensional scaling (MSDS) analysis  
142 the using R package lostruct version 0.0.0.9000 (Li and Ralph, 2019), which subdivided genomes  
143 into four partitions, three outliers (LS1, LS2, LS3) and one non-outlier partition (Figure 2;  
144 Supplementary Figure 2). Note that outlier groupings are not analogous across taxa. On average  
145 across all species 85.3% of labeled values were non-outliers, and ~4.88% each were LS1, LS2,  
146 and LS3.

147 The number of highly differentiated regions in the genome varied between species. F<sub>ST</sub>  
148 outlier analysis across datasets with different levels of missing data found largely congruent results  
149 with respect to how many outliers were present across taxa (see Supplementary Information for  
150 75% and 50% datasets). The number of high F<sub>ST</sub> outliers for the complete dataset ranged from 28–  
151 758 across species (with the total number of windows analyzed per species ranging from 100,733–  
152 113,555). The outlier lostruct partitions identified above (LS1, LS2, LS3) vary in the proportion  
153 of the F<sub>ST</sub> outliers examined (for the complete dataset), ranging from 0.0%–3.4% (mean 0.2%) for  
154 peaks. Though not significant, there appears to be a trend where species with generally higher F<sub>ST</sub>  
155 have more high-F<sub>ST</sub> outliers identified.

156

### 157 *Population differentiation*

158 Signatures of population structure varied in our ten species. Population differentiation in  
159 species ranged from being highly structured among deserts in four species (*T. curvirostre*, *V. bellii*,  
160 *A. flaviceps*, and *P. melanura*), showing a gradient of structuring with admixture in three (*T.*  
161 *crissale*, *M. fusca*, and *Cardinalis sinuatus*), or unstructured in the remaining taxa (*A. bilineata*,  
162 *C. brunneicapillus*, *P. nitens*; Supplementary Figure 3). F<sub>ST</sub> values for the species within these  
163 three groups varied accordingly: highly structured=0.03–0.10; gradient=0.03–0.04; and  
164 unstructured=0.02–0.03. Population differentiation estimated from the chromosomal partitions

165 were generally concordant with genome-level patterns, but smaller chromosomes and/or those  
166 with fewer SNPs showed different patterns (Figure 3, Figure 4, Supplementary Figure 4).

167 Species varied in how wide their clines of genetic relatedness were between chromosomes.  
168 Mean cline width ranged from 6.9–15.9° longitude, where the total area encompassed by each  
169 species was ~18° longitude (with zero on the cline defined as 116.1°W longitude; Supplementary  
170 Table 2; Figure 3; Figure 4; Supplementary Figure 1). Cline width increases as chromosome size  
171 decreases ( $p=1.4 \times 10^{-6}$ , adjusted  $R^2=0.06$ ), though this varies across species (range  $p=7.7 \times 10^{-7}$ –  
172 0.43, range adjusted  $R^2=-0.01$ –0.51). Mean cline center location ranges from 3.6° along the cline  
173 (~112°W) to 12.7° along the cline (~103°W). We found that there were negative correlations  
174 between the degree of population structure (measured by  $F_{ST}$ ; see Supplementary Information) and  
175 both mean cline width and the standard deviation of cline center locations, which was expected  
176 based on how clines are calculated. Species with higher  $F_{ST}$  between populations had narrower  
177 clines and less variation among partitions in the locations of their clines (Supplementary Figure  
178 5). Cline width is also significantly, but weakly, associated with recombination rate ( $p=0.0023$ ,  
179 adjusted  $R^2=0.02$ )

180

### 181 *Phenotypic variation across the Cochise Filter Barrier*

182 There were no clear, desert-specific patterns in morphological variation across the Cochise  
183 Filter Barrier ( $N=234$ ), with morphological changes ranging from subtle to significantly different.  
184 In our principal components analysis, the first three principal components (PC1, PC2, PC3)  
185 explained 74%, 12%, and 6% of the variation in morphology and corresponded approximately to  
186 overall body size, bill size/shape, and wing size/shape, respectively (Supplementary Table 3,  
187 Supplementary Table 4; Supplementary Figure 9). We found significant differences across the  
188 Cochise Filter Barrier in six species in at least one analysis (Figure 6; see Supplementary  
189 Information for more details). Between deserts, *T. crissale* and *C. sinuatus* differed in body size  
190 and bill shape. *Vireo bellii* and *M. fusca* differed in bill shape. *Polioptila melanura* and *A. flaviceps*  
191 differed in body size. No species showed significant differences in wing shape.

192

### 193 *Climatic suitability and abundance across the Cochise Filter Barrier*

194 During the Last Glacial Maximum, the most suitable areas for all taxa were projected to be  
195 further south than the most suitable areas during the present and mid-Holocene. Regions that are

196 predicted to be suitable through all three periods are often reduced compared to current  
197 distributions (Supplementary Figure 8; Supplementary Figure 10). We calculated abundance for  
198 each species using the Breeding Bird Survey (Pardieck et al., 2019). Abundance was correlated  
199 with predicted climatic suitability across all taxa, with adjusted  $R^2$  values of fit lines (log-scaled)  
200 ranging from 0.42–0.62 (Figure 4, Supplementary Figure 6, Supplementary Figure 7).

201

### 202 *Phenotypic and genotypic datasets are idiosyncratic with respect to landscape features*

203 We used generalized dissimilarity matrix (GDM) models to determine which geographic  
204 features best described variation in different partitions of genetic and phenotypic data. We had 515  
205 combinations of species and partitions (out of a total possible of 540). For univariate models,  
206 performance of generalized dissimilarity matrix models was generally consistent whether looking  
207 at univariate, bivariate, or trivariate data partitions (see Supplementary Information). 2,899/3,090  
208 univariate models converged successfully with an overall 94% convergence. Of those 515 datasets  
209 tested, 18.0% selected IBE as the best factor explaining variation, 17.5% selected IBB, 17.2%  
210 selected IBA, 9.1% selected IBD, 18.8% selected IBH, and the remainder were ambiguous, with  
211 multiple models equally explaining variation. Within the ambiguous models, of which there were  
212 98, the best models often included IBE (99.0% of models), IBH (81.6%), and IBD (72.5%); in  
213 contrast, the best models rarely included IBA (4.1%) or IBB (2.0%). Across all the GDMs, percent  
214 deviance explained by the best model was variable, ranging from 0.1% to 81.9%. The mean $\pm$ SD  
215 percent deviance explained for these runs was 12.7% $\pm$ 13.6%. Percent deviance explained for the  
216 whole genome was lower on average, ranging from 0.1%–29.2% (mean $\pm$ SD 10.8% $\pm$ 10.4%).  $F_{ST}$   
217 outliers, both high and low, tended to have lower percent deviances explained, ranging from 0.1%–  
218 21.9% (mean $\pm$ SD 6.5% $\pm$ 6.5%). Lostruct outliers ranged from 0.5%–32.2% (mean $\pm$ SD  
219 8.1% $\pm$ 7.3%). Percent deviance explained had the most extreme range in morphology, from 0.3%  
220 to 81.9% (mean $\pm$ SD 16.6% $\pm$ 20.8%). The percent deviance explained for all datasets varied across  
221 taxa, with means ranging from 3.2% (*M. fusca*) to 20.3% (*A. bilineata*) and standard deviations  
222 ranging from 8.7%–16.4%.

223 For the models examining signals across the whole genomes, three species had IBB as the  
224 most important predictor, one had IBE, two had IBH, one had IBA, and three had mixed support.  
225 (Figure 5; Supplementary Figure 11). IBD was the least common predictor across chromosomes  
226 (5.2%), while all other predictors were of approximately equal frequency (19.6% IBH, 19.0% IBE,



227 18.2% IBB, 17.0% IBA, and 20.8% mixed support for multiple models). Within the mixed models,  
228 IBE was included 100% of the time, IBH was included 77.7% of the time, IBD was included 73.6%  
229 of the time, and IBE and IBB were each included 2.3% of the time.

230 For the lostruct partitions, the outlier partitions (LS1, LS2, LS3) had 4/30 with IBA as the  
231 best model, 6/30 IBB, 2/30 IBD, 5/30 IBE, 6/30 IBH, and 7/30 as ambiguous. Among the  
232 ambiguous models, all of them showed IBE as important and nearly all showed IBH, IBD, or both  
233 as important. Most species showed at least some overlap in which model best explained partitions:  
234 for example, *A. bilineata* and *C. sinuatus* all have at least two lostruct partitions best explained by  
235 IBB.

236 For the non-outlier partitions (LS0), the best model chosen was the same as the best model  
237 explaining whole-genome variation in all but three species (*V. bellii*, *A. flaviceps*, and *A. bilineata*)  
238 and that of one of the outlier partitions in all but two species (*V. bellii*, *A. flaviceps*). Notably, for  
239 *P. melanura* all three outlier partitions, the genome, and the non-outlier lostruct partitions are  
240 explained by multiple models (specifically, IBD, IBE, and IBH for all). Likewise, for *T. crissale*,  
241 all of these were explained by IBH.

242 For the genomic regions with  $F_{ST}$  outliers, the best predictors across species were generally  
243 congruent between different outlier partitions and the whole genome. In all species but *A. bilineata*,  
244 the non- $F_{ST}$ -outliers had the exact same best predictors as that of the whole genome (or in cases  
245 where multiple models were equally good predictors, one was a subset of the other). High- $F_{ST}$   
246 outliers showed different best predictors than the genome in *C. brunneicapillus*, *A. bilineata*, *A.*  
247 *flaviceps*, and *M. fusca*. Low- $F_{ST}$  outliers showed different best predictors than the genome in *C.*  
248 *brunneicapillus*, *A. flaviceps*, *M. fusca*, and *P. nitens*.

249 There was little congruence across the best landscape predictor of morphological data  
250 within species; however, the best performing model across these three datasets was most  
251 frequently IBA (37.5%), IBD (17.5%), and IBH (17.5%), with relatively fewer models with IBE  
252 (12.5%), IBB (7.5%), IBB or a mixture of models (7.5%, with approximately even amounts of  
253 IBA, IBD, IBE, and IBH making up the mixture). 3/30 of the PCs matched overall morphology in  
254 terms of best predictors (including mixtures of models). Additionally, 10/30 individual PCs did  
255 match each other when they did not match the genome: PC1 and PC2 in four species, PC1 and  
256 PC3 in two species, and PC2 and PC3 in four species. Notably, all PCs in *A. bilineata* were best  
257 explained by IBA despite its overall morphology being best explained by IBH. While the

258 distribution of best models for overall morphology, PC1, and PC3 were not significantly different  
259 than expected, for PC2 this was nearly significant ( $\chi^2=6.8$ ,  $p=0.079$ ,  $df=3$ , simulated  $p=0.11$ )

260 Overall morphological variation was best explained by IBA in 4/10 species, IBH in 3/10,  
261 and 1/10 each for IBB, IBD, and IBE. In contrast, PC1 (body size) showed a more even distribution  
262 between all models (1/10 IBE, 2/10 IBA, 3/10 IBD, 2/10 IBB, 2/10 IBH). PC2 (bill shape) was  
263 best explained in 6/10 of species by IBA, 1/10 each by IBE and IBD, and 2/10 with a mixture of  
264 results (combinations of IBA, IBD, IBH, and IBE). Lastly, PC3 (wing shape) was best explained  
265 in 3/10 of species by IBA, 2/10 each by IBE, IBD, and IBH, and 1/10 of species had ambiguous  
266 results (IBA, IBE, and IBH).

267

### 268 *Data characteristics of best-fit models*

269 Genomic summary statistics were associated with which geographic patterns best predicted  
270 variation within species. Cline width per chromosome was significantly different relative to the  
271 predictors ( $p = 1.85e-5$ ), being wider between IBB models and IBD or mixed models, between  
272 IBH models and IBD or mixed models, and between IBE and IBD models. Cline centers also  
273 significantly differed, with chromosomes supporting mixed models having much more eastern  
274 cline centers than chromosomes supporting IBA, IBB, IBE, or IBH models. Centers were also  
275 significantly more eastern for chromosomes predicted by IBA models than by IBH models  
276 ( $p=8.86e-10$ ). Chromosomes with lower recombination were significantly more likely to be  
277 explained by mixed models than by IBA or IBE models ( $p = 0.0147$ ). Chromosomes explained by  
278 mixed models also had higher estimated  $F_{ST}$  than those explained by IBA, IBB, or IBH models ( $p$   
279  $= 4.2 \times 10^{-5}$ ). Chromosomes with IBH as the best model had lower  $D_{XY}$  than those with IBB or IBE  
280 as best models. Chromosomes with less missing data were more likely to show mixed support for  
281 models compared to IBA, IBE, or IBH models, and more likely to show IBB over IBA or IBE  
282 models. Species with higher mean contact zone suitability were more likely to have IBB as the  
283 best model compared to all other models, and species with lower contact zone suitability were  
284 more likely to have IBH as the best model compared to all other models. Likewise, species with  
285 highly variable habitat suitability were more likely to have IBH as the best model. Not significant  
286 at all was chromosome length across predictors. Tajima's D was significantly different across  
287 chromosomes with different models ( $p = 0.0432$ ), but Tukey's honestly significant difference tests  
288 showed that none of the individual comparisons were significant.

289 Species differed more than expected with respect to what geographic models best explain  
290 their genotypes and phenotypes. Best-predictors vary across individual species ( $\chi^2=816.8$ ,  $p\sim 0.0$ ,  
291  $df=45$ , simulated  $p<0.0005$ ) and with respect to whether or not species have phylogeographic  
292 structure across the Cochise Filter Barrier ( $\chi^2=188.6$ ,  $p\sim 0.0$ ,  $df=10$ , simulated  $p<0.0005$ ).  
293 However, best-predictors did not vary with respect to individual genotypic or phenotypic partitions  
294 ( $\chi^2=238.3$ ,  $p=0.88$ ,  $df=265$ , simulated  $p=0.88$ ).

295

## 296 **Discussion**

297 We tested modes of population structuring in birds distributed across a biogeographic filter  
298 barrier, where we found that genomic landscapes were best-explained by different geographic  
299 models across partitions at multiple scales. The disparity in predictors of intraspecific  
300 differentiation among the whole genome versus windows and between windows extends the view  
301 that evolutionary inferences are dependent on which portions of the genome are examined in a  
302 spatial framework. Despite this, individual species behave more consistently than expected across  
303 all of their corresponding genomic and phenotypic partitions. The heterogeneity in model fit  
304 between taxa partitions was consistent with the expectation that various evolutionary processes  
305 contribute to the peaks and valleys of the genomic landscape. By applying this framework across  
306 an assemblage of birds that evolved across a common, dynamic region we showed that at the  
307 community-scale, predictors of genomic structure remain idiosyncratic across the community,  
308 which may reflect taxa at different stages of the population histories and responses to a barrier that  
309 mediates gene flow.

310

### 311 *Extrinsic drivers of the genomic landscape*

312 Our modeling showed that environmental distance was a common predictor of levels of  
313 intraspecific differentiation, but this pattern was species-dependent. Contemporary environment  
314 was the single most important or one of the most important factors in nearly 40% of partitions,  
315 followed closely by the paleoclimate environment (Supplementary Figure 2). Genome-wide  
316 patterns of differentiation across the Cochise Filter Barrier are partially shaped by environmental  
317 adaptation as observed in non-avian taxa distributed across the barrier (Myers et al., 2019).  
318 Environmental adaptation is often recovered in taxa who respond to environmental gradients via  
319 altered phenotypes (Branch et al., 2017, Dubec-Messier et al., 2018), genotypes (Berg et al., 2015,

320 Manthey and Moyle, 2015), or both (Ribeiro et al., 2019). Despite the importance of environment  
321 on the genotype and phenotype in these birds, the fact that patterns are highly species specific  
322 instead suggests that individual taxa have unique responses to those environments. Although the  
323 focal taxa are co-distributed, we showed how environmental suitability, their general  
324 morphologies, and abundances across space varied among species, which may help explain why  
325 best-fit models differed. As such, these species-specific factors likely explain isolation by  
326 environment was the best explanatory variable for many, but not all, of the species we investigated.

327 Individual partitions of the genome also varied with respect to how much environmental  
328 variation played a role. At one extreme, environmental variation appears to have a strong impact  
329 on the sex chromosomes. Environment was the most (or one of the most) important factor on the  
330 Z chromosome for 6/10 species, including species with population structure, a gradient, and  
331 panmixia. This is likely because the chromosome evolves faster than sites under selection for  
332 adaptation to local environmental conditions. Sex chromosomes are known to diverge faster than  
333 autosomes due to their differences in effective population size (Mank et al., 2010), importance in  
334 sexual selection (Kirkpatrick, 2017), and the presence of speciation genes (Sæther et al., 2007).  
335 Given the evidence for environmental variation predicting genetic differentiation on the Z  
336 chromosome, this would suggest that any speciation genes present in these taxa may be involved  
337 in adaptation to the environment. The autosomes, in contrast to the sex chromosomes, vary in how  
338 important environment is, from some chromosomes with environment only being one of multiple  
339 factors (i.e., chromosome 1) to autosomes that are majority driven by environment (i.e.,  
340 chromosome 27).

341 The environment was the most important driver for species with genetic structure, with  
342 35.3% of partitions in structured species having the environment as the best model. The most  
343 intuitive explanation for this was that population structuring in these taxa was facilitated by natural  
344 selection to the environmental gradient across the barrier. There was some evidence that this could  
345 have happened across other taxa that occur across the Cochise Filter Barrier, as IBE was the best  
346 predictor of genome-wide divergence in a community of snakes distributed across the barrier  
347 (Myers et al., 2019). However, we must stress that while this explanation was the most intuitive  
348 and aligns with predictions, there are numerous processes that can produce IBE (Wang and  
349 Bradburd, 2014), and it is possible that divergence led to adaptation to these environments  
350 secondarily, rather than the reverse, or the patterns are being influenced by some factors that we

351 did not quantify. Nevertheless, at present our results are consistent with the importance of  
352 ecologically mediated population differentiation, or isolation by environment, in structuring  
353 communities across the deserts of North America.

354

### 355 *Contemporary versus historical predictors of genomic differentiation*

356 Our finding that the best-fit models varied across species was consistent with the  
357 expectations that species idiosyncratically respond, over a range of time scales, to the Cochise  
358 Filter Barrier. The spatial patterns we examined vary temporally, with Pleistocene environmental  
359 changes being a historical process, while geographic distances, abundances, and environmental  
360 variation reflecting more contemporary processes. Historical signatures of Pleistocene isolation  
361 are commonly recovered patterns for the Cochise Filter Barrier (Provost et al., 2021) and other  
362 communities (Shafer et al., 2010; Ralson et al., 2021), and our data showed that isolation in glacial  
363 refugia best explained genome-wide differentiation in two of our species, one that showed a  
364 gradient of phylogeographic relatedness and one that was unstructured. Within chromosomes,  
365 there are two additional species where one of multiple, equally-well-fit predictors is historical  
366 isolation. The lack of signal in the other six species, particularly the ones with phylogeographic  
367 structure across the barrier, could be due to erosion of historical signals as the Cochise Filter  
368 Barrier filters taxa and changes the contemporary patterns of gene flow. Alternatively, our proxy  
369 for IBH (resistance over projected Pleistocene habitat suitability) may be a poor model for actual  
370 historical isolation. For example, paleoenvironmental gradients may no longer be as readily  
371 detectable. Nevertheless, this lack of support for paleoenvironmental factors, and thus glacial  
372 refugia, suggests that these processes may not leave strong detectable signals in the genomes of  
373 most of these desert birds.

374 In contrast, current environments best explain a large amount of genetic and morphological  
375 variation, suggesting that phenomena operating on more recent timescales influenced  
376 contemporary patterns across the landscape. If some of the taxa herein are going through incipient  
377 speciation, then these contemporary factors should be most potent. Our identification of species  
378 abundances as a relatively important predictor of genetic divergence aligns well with landscape  
379 genetic studies that use proxies for the effects of contemporary phenomenon and ecological factors  
380 on genetic variation (Burney and Brumfield, 2009; Paz et al., 2015). For example, urbanization,  
381 which fragments and reduces population sizes, is well known to impact rates of gene flow and

382 drift, acting as a strong barrier of gene flow since the 20th century (Miles et al., 2019). Our use of  
383 available abundance data across large spatial scales shows a more direct relationship between  
384 varying abundances across the landscape with levels of differentiation. Further, while both  
385 historical and contemporary processes are influencing taxa across this biogeographic barrier,  
386 environmental patterns in particular irrespective of timing seem more influential.

387

### 388 *Relationship between best-models and window summary-stats*

389 In contrast to the extrinsic drivers of the genomic landscape that we have focused on here,  
390 there were few clear associations between partition characteristics and support for a particular  
391 model. For example, we found that regions with low predicted recombination rate were more likely  
392 to show multiple models as equally important. At the phylogeographic-scale, low recombination  
393 regions of the genome have been shown to be more likely to reflect population structure (Martin  
394 et al., 2019, Li et al., 2019, Manthey et al., 2021). The avian recombination rate landscape is  
395 thought to be conserved across taxa, even though exact genomic locations of divergence across  
396 taxa are not (Singhal et al., 2015, Turbek et al., 2021). Correlations in recombination rates at the  
397 same genomic position in other species are greater than 0.37 across chromosomes and always  
398 positive (Turbek et al., 2021), even across large phylogenetic distances. The ten desert birds we  
399 investigated, which range in divergence time from ~9 to ~55 million years between taxa (Harris et  
400 al., 2018; Kumar et al., 2017; Barker et al., 2015; Mason and Burns, 2013; Price et al., 2014;  
401 Pasquet et al., 2014; Hooper and Price, 2017; Mitchell et al., 2016; Gibb et al., 2015), have  
402 correlations in recombination rates at the same genomic position that were often smaller in  
403 magnitude and negative. This could reflect a real pattern, where the recombination landscapes are  
404 only conserved within more closely related species; our closest taxa, the two non-sister *Toxostoma*,  
405 do have the highest correlation in recombination rates across windows and are in the top 25% of  
406 the distribution in correlations. However, the differences found could have been caused by  
407 coverage depth, differences in the recombination rate estimators used, missing data allowance, or  
408 the fact that software that estimates recombination rates do not currently exist that can handle  
409 genotype likelihood data. In addition, genetic partitions with higher  $F_{ST}$  were more likely to show  
410 multiple best models as being important. We expect regions with high differentiation to instead be  
411 associated with the presence of the barrier if the barrier reflects actual divergence. However, this  
412 was not the case. We suggest that this reflects the gradient in differentiation across species in the

413 community, both in the degree to which divergence has happened, the genomic locations of any  
414 differentiation, and the timing of divergence.

415 We explored the signal in our data by examining multiple ways of partitioning genomic  
416 windows, using different thresholds of missing data, and evaluating how data attributes influenced  
417 model support. We found that genetic partitions with more missing data were more likely to have  
418 ambiguous results. Genetic summary methods like PCA are impacted by missing data, particularly  
419 when they are imputed, which can cause individuals with disproportionately high levels of missing  
420 data to appear like they are admixed between populations (Yi and Latch, 2021). It is likely that the  
421 reverse is true, where individuals with disproportionately low levels of missing data should fall  
422 out as their own populations more readily. Here we expect individuals with exceptionally low  
423 coverage should behave similarly. For example, in some of our species (namely *Vireo bellii*,  
424 *Auriparus flaviceps*, *Polioptila melanura*) the individuals with highest missing data clustered as  
425 their own population before detecting any other spatial patterning. We ameliorated this by  
426 dropping individuals with too much missing data in some of our datasets. Overall, we did not find  
427 qualitative differences in population assignments, but it did generally inflate our fixation values  
428 and deflate our genetic diversity values. This is sensible, as reducing the number of individuals  
429 should both increase the likelihood of fixation due to sampling error as well as decrease the overall  
430 amount of nucleotide diversity.

431 The clines of population differentiation across space that we measured were narrower in  
432 longer chromosomes. One explanation for this is that larger chromosomes are more dense with  
433 respect to polymorphisms across the deserts (Supplementary Figure 24), therefore having more  
434 information content with respect to clines. However, we propose that this is mediated by  
435 recombination variation across the genome. Chromosome length is frequently negatively  
436 correlated with recombination rate, where generally, the recombination rates are lower on larger  
437 chromosomes due to the necessity of crossovers to ensure successful meiosis (Tigano et al., 2022).  
438 This is a common occurrence in many taxonomic groups (Kaback et al., 1992; Jensen-Seaman et  
439 al., 2004; Pessia et al., 2012; Farre et al., 2013, Kawakami et al., 2014, Haenel et al., 2018 Tigano  
440 et al., 2022). Lowered recombination rate would be less likely to break up genetic variants within  
441 the genome in the event of gene flow between two populations. Further, SNP diversity is positively  
442 correlated with recombination, possibly due to mutagenesis at those sites (Lercher and Hurst, 2002;  
443 Arbeithuber et al., 2015) Regions of low recombination are known to facilitate genomic changes

444 such as selective sweeps (e.g., Burri et al., 2015; Bourgeois et al., 2019). However, in our dataset  
445 recombination rate was not associated with the size of the chromosome. Post-hoc, we broke down  
446 this relationship into structured and unstructured species, where we found that species with  
447 structure or a gradient showed no association, while species that were panmictic exhibited the  
448 assumed negative relationship. Our within-species recombination estimating method is known to  
449 be sensitive to historical demographic events (Adrion et al., 2020); as such, the presence of  
450 population structure herein may have caused the estimates to deviate from expected patterns. As  
451 such, we suspect that recombination landscape differences associated with chromosome length are  
452 contributing to the differences in these clinal patterns.

453

#### 454 *Morphological versus genetic associations*

455 We found that in most taxa, genotypic and phenotypic variation within species, and even  
456 different aspects of morphological phenotype within species, were not associated with the same  
457 landscape factors, in contrast to high congruence within species in different genotypic datasets.  
458 Phenotypes were better explained by abundance, whereas genotypes were better explained by the  
459 contemporary and historical environment. Discordance between genetic and phenotypic predictors  
460 of spatial variation have been observed in other systems, where phenotypic variation was better  
461 explained by the environment (Moreira et al., 2020). This discordance could be due to polygenic  
462 traits, where genotype-phenotype associations may be mediated by multiple loci of small effect  
463 working in concert, either by changing protein structure or regulation (Yusuf et al., 2020, Knief et  
464 al., 2017, Duntsch et al., 2020, Aguillon et al., 2021). However, for some phenotypes like plumage  
465 color, single genes of large effect have been implicated which should strengthen correlations  
466 between genotype and phenotype, at least for those loci (Sin et al., 2020; Toews et al., 2016). For  
467 desert birds in particular, phenotypic variation in metabolism (as well as in microbiomes) has been  
468 linked to genes that vary with the environment (Ribeiro et al., 2019). In our study, as with genetic  
469 differentiation, the extent of phenotypic structuring varied across species, with bill and body size  
470 being significantly different between deserts in a few taxa, but somewhat surprisingly,  
471 environmental variation did not usually explain morphological differences. For example,  
472 adaptations in bill morphology are frequently observed, such as in Song Sparrows on the Channel  
473 Islands that have higher bill surface area in hotter climates (Gamboa et al., 2021). The lack of a  
474 tight correlation between environment and phenotype in our study were likely reflective of the



475 shallowness of the evolutionary divergences and the subtlety of the environmental gradient across  
476 deserts. The two *Toxostoma* species in our study have previously shown contrasting patterns with  
477 respect to climate on beak morphology: *T. crissale* has larger bills in drier habitats, which may aid  
478 in cooling while conserving water, while *T. curvirostre* showed a pattern contrary to  
479 thermoregulatory predictions with larger bills in cooler climates (Probst et al., 2021), suggesting  
480 even in closely related species climate may not have the same role on morphological variation.  
481 Even though phenotypic data partitions often did not have the same explanatory factor with respect  
482 to the general dissimilarity modeling, there was a correlation between population structure in the  
483 genome (and chromosomes to a lesser extent) and phenotypic variation across these ten birds, in  
484 that taxa lacking morphological change also lacked genetic variation overall.

485

#### 486 *Fitness effects of the Cochise Filter Barrier*

487 We found multiple species that have relatively sharp clines across the Cochise Filter  
488 Barrier, typically the taxa that also show population structure. These clines may represent areas  
489 that are hybrid zones, potentially under selection against the two populations coming back into  
490 contact. Our sampling throughout that transition zone is quite extensive, with the exception of *V.*  
491 *bellii*. In three species (*T. crissale*, *T. curvirostre*, *M. fusca*) there are one or two individuals close  
492 to the transition zone between the deserts that have intermediate assignments between populations  
493 according to our NGSadmixture analysis. For *T. curvirostre* in particular, this is close to where hybrid  
494 individuals have already been suggested to exist (e.g., Zink and Blackwell-Rago, 2000). Further,  
495 one species (*P. melanura*) has individuals close to this transition zone, though only when three  
496 populations are assigned rather than two. Multiple individuals of two species (*A. bilineata*, *C.*  
497 *sinuatus*) also come out as being admixed, but distributed throughout the range of the species. It  
498 is likely that the Cochise Filter Barrier is thus causing fitness effects, especially in those taxa that  
499 have few individuals admixed in the transition zone. Further investigation with more explicit  
500 determination of hybrid status in these species is likely warranted.

501

#### 502 *Conclusion*

503 By quantifying patterns in genotypic and phenotypic variation in communities distributed  
504 across a barrier to gene flow, we found that multiple co-occurring processes occur that impact  
505 genomic and phenotypic divergence within taxa. Environmental gradients were among the most

506 important associations in predicting genetic and phenotypic variation, but the best-fit model was  
507 highly associated with species-specific patterns. These findings underscore the importance of  
508 accounting for heterogeneity in the genome, phenome, and diversification mechanisms acting  
509 across time and space to have the most comprehensive picture of geographic structuring in species.  
510 This will allow for an assessment of whether biotic and abiotic geographic variation, which act as  
511 proxies for neutral and adaptive processes, consistently predict variation across phenotypes and  
512 genotypes that are evolving under the same conditions. Without a holistic understanding at each  
513 of these levels of organization, as well as the addition of future work that concurrently estimates  
514 selection at the organismal and the nucleotide levels, the actual mechanisms that shape  
515 communities will remain obscured. Overall, this work displays the necessity of integrating  
516 geographic predictors of population divergence, differentiation across the genomic landscape, and  
517 phenotypic variation in understanding the multiple different mechanisms that have produced the  
518 population histories we see across contemporary communities of birds in North America.

519

## 520 **Methods and Materials**

521

### 522 *Study system*

523 The Sonoran and Chihuahuan Deserts contain environmental and landscape variation that  
524 make them suitable for testing if any of the five discussed geographic models (IBA, IBB, IBD,  
525 IBE, and IBH) structure intraspecific variation in taxa. Across the two deserts and the transition  
526 zone between them, there is variation in precipitation, elevation, temperature, and vegetation that  
527 could result in local adaptation and isolation by environment. (Shreve, 1942; Reynolds et al.,  
528 2004). Pleistocene glacial cycles repeatedly separated and connected, such that some taxa  
529 experienced dramatic range shifts (Smith et al., 2011; Zink, 2014), which could have isolated taxa  
530 in each desert. Further, there is a well-studied biogeographic barrier separating the deserts, the  
531 Cochise Filter Barrier, which is an environmental disjunction that demarcates the transition  
532 between the Sonoran and Chihuahuan Deserts of southwestern USA and northern Mexico. The  
533 barrier is thought to have begun forming during the Oligo-Miocene and completed during the Plio-  
534 Pleistocene (Morafka, 1977, Van Devender, 1990; Van Devender et al., 1984, Holmgren et al.,  
535 2007, Spencer, 1996) and has formed a community ranging from highly differentiated taxa to  
536 unstructured populations (Provost et al., 2021). Demographic troughs caused by geographically

537 varying population abundances could impact the frequency of gene flow across the landscape and  
538 the degree of genetic connectivity across the deserts.

539

#### 540 *Genetic sequencing and genome processing*

541 We performed whole-genome-resequencing for 10 species of birds from the Sonoran and  
542 Chihuahuan Deserts, obtaining genetic samples from new expeditions and loans from natural  
543 history museums (*Cardinalis sinuatus*; *Toxostoma crissale*, *Toxostoma curvirostre*; *Amphispiza*  
544 *bilineata*, *Melospiza fusca*; *Poliophtila melanura*; *Phainopepla nitens*; *Auriparus flaviceps*;  
545 *Campylorhynchus brunneicapillus*; *Vireo bellii*; Supplementary Table 5; Supplementary Figure  
546 15). These species reflect different songbird morphotypes and ecologies in the deserts (e.g., large-  
547 to small-bodied, insectivorous to granivorous, migratory to resident). Three of these species (*V.*  
548 *bellii*, *T. curvirostre*, *M. fusca*) have shown evidence of structure across the Cochise Filter Barrier,  
549 while an additional three (*P. melanura*, *A. flaviceps*, *C. brunneicapillus*) have shown evidence of  
550 no structure (Zink et al., 2001; Rojas-Soto et al., 2007; Teutimez, 2012; Klicka et al., 2016, Smith  
551 et al., 2018). However, some of the taxa without structure at the Cochise Filter Barrier do have  
552 structure at other barriers (e.g., Vázquez-Miranda et al., 2022).

553 Using 221 individuals across our 10 focal species, we sequenced 8–14 individuals in both  
554 the Sonoran and Chihuahuan Deserts per species for a total of 18–25 samples per species. We  
555 extracted DNA using the MagAttract HMW DNA Kit (Qiagen); 33 of the samples were extracted  
556 using a Phenol-Chloroform protocol, but we switched to the former to improve extraction quality.  
557 Library preparation and sequencing was performed by RAPiD Genomics (Gainesville, FL) on an  
558 Illumina HiSeq X PE150. All individuals sent on the same plate were sequenced across N lanes,  
559 where N is the number of samples divided by 20. We sent six plates which ranged from 20–96  
560 individuals (some plates also contained individuals from other projects).

561 We mapped raw reads of each species to their phylogenetic closest available reference  
562 genomes (Supplementary Table 6): notably, *A. bilineata* and *M. fusca* were mapped to the same  
563 genome, as were *C. brunneicapillus*, *T. crissale*, *T. curvirostre*, *P. melanura*, and *P. nitens* (see  
564 Supplementary Information). Before mapping, we created pseudo-chromosomal assemblies of  
565 these genomes using Satsuma version 3.1.0 (Grabherr et al., 2010) by aligning to the *Taeniopygia*  
566 *guttata* genome (GCF\_000151805.1), retaining pseudo-chromosomes with the prefix  
567 “PseudoNC”. Hereafter, pseudo-chromosomes will be referred to as chromosomes.

568 We filtered our sequences with FastQ Screen version 0.14.0 (Wingett et al., 2018) to  
569 remove contamination by filtering out reads that mapped to PhiX and the following genomes:  
570 *Homo sapiens*, *Escherichia coli*, *Enterobacteriophage lambda*, and *Rhodobacter sphaeroides*. For  
571 more details on bioinformatics methods, see Supplementary Information. In brief, we did the  
572 following: From our raw reads, we used a pipeline that produced genotype likelihoods using  
573 ANGSD version 0.929 (Korneliussen et al., 2014). We converted cleaned FastQ files to BAM  
574 using bwa version 0.7.15 (Li and Durbin, 2009, Li and Durbin, 2010) and picard version 2.18.7-  
575 SNAPSHOT from the GATK pipeline (McKenna et al., 2010, DePristo et al., 2011, Van der  
576 Auwera et al., 2013). Next, we prepared the BAM files to be used in the ANGSD pipeline using  
577 samtools version 1.9-37 (Li et al., 2009; Li, 2011), bamUtil version 1.0.14 (Jun et al., 2015), and  
578 GATK version 3.8-1-0 (McKenna et al., 2010). This methodology creates genotype likelihoods to  
579 account for uncertainty for low-coverage sequences.

580 We investigated the impact of missing data (due to low coverage) on our analyses using  
581 three thresholds for retaining sites: a complete dataset, in which all individuals were retained  
582 irrespective of missing data; a 75% dataset, in which individuals were only retained if they had  
583 less than 75% missing sites; and a 50% dataset, in which individuals were only retained if they  
584 had less than 50% missing sites. These different datasets were used for a suite of downstream  
585 analyses to assess the sensitivity of the results to individuals with missing data.

#### 586 587 *Evaluating population structure across the Cochise Filter Barrier*

588 We characterized the degree of population structure across the whole genome and in  
589 individual chromosomes across the Cochise Filter Barrier in our focal species. First, we used a  
590 combination of PCAngsd in ANGSD (Meisner and Albrechtsen, 2018) and NGSadmixmap (Skotte et  
591 al., 2013), to assign individuals to K clusters and estimate admixture proportions for each  
592 individual. We chose K=2 to evaluate whether there was structure across the Cochise Filter Barrier  
593 (though we visualized K values from two to three). Because of differences in coverage among  
594 individuals, we performed this for the complete, 75%, and 50% missing data datasets, but found  
595 that these values were largely congruent across the datasets, and so we only use the complete  
596 dataset for describing population structure (Supplementary Figure 16, Supplementary Figure 17,  
597 Supplementary Figure 18). Second, we plotted PCAngsd individual population assignments over  
598 space using a cline analysis via the hzar version 0.2-5 R package (Derryberry et al., 2014) and

599 custom scripts (modified from Burbrink et al., 2021). Analyses were conducted in R version 3.6.1  
600 (R Core Team, 2019). We did this to quantitatively evaluate the differences in population structure  
601 across chromosomes and in the genome more broadly. We thus were able to calculate the location  
602 and width of clines for the entire genome and each chromosome.

603         Complementing our genome-wide analyses, we ran a local principal components analysis  
604 along the genome on the complete dataset using the R package lostruct version 0.0.0.9000 (Li and  
605 Ralph 2019). Different chromosomes showed different relationships between individuals with  
606 respect to predicted phylogeographic relatedness (see Supplementary Information). Because of  
607 this, we wanted to cluster regions of the genome together that showed similar relationships  
608 between individuals in case specific evolutionary processes were causing this pattern. The lostruct  
609 method performs principal component analysis on individual windows of the genome, then uses  
610 multidimensional scaling (MSDS) to summarize how similar the windows' principal component  
611 analyses are when dividing the genome. To accommodate genotype likelihoods in the method, we  
612 calculated covariance matrices using PCAngsd to describe the relationships between individuals,  
613 then fed those covariance matrices into the lostruct code. We extracted three subsets of outliers for  
614 each species, which we designated LS1, LS2, and LS3, and compared it to the remainder of the  
615 genome, representing non-outliers.

616

### 617 *Genomic summary statistics*

618         We characterized genetic variation across each species' genome and partitions of the  
619 genome by calculating a suite of summary statistics and metrics. To quantify genetic  
620 differentiation within each species, we calculated pairwise genetic distances from the genotype  
621 likelihoods using NGSdist (Vieira et al., 2016), which served as the genetic distance matrices for  
622 our generalized dissimilarity matrix models (see below). Neighbor-joining trees were calculated  
623 from these matrices to contrast genealogies across the genome. Genealogies across the genome  
624 were visualized by calculating pairwise and normalized Robinson-Foulds (RF) distances between  
625 all pairs of trees per species (Robinson and Foulds, 1981). We also performed a sliding window  
626 D<sub>XY</sub> analysis using the calcDxy R script included with ngsTools version 1.0.2 (Fumagalli et al.,  
627 2014), which gives site-wise D<sub>XY</sub> values, and then averaged across windows. Windows were  
628 overlapping with a size of 100,000 base pairs and offset by 10,000 base pairs. Missing data were

629 calculated using vcftools (Danecek et al., 2011). This was calculated per window, per  
630 chromosome, per genome, per site, and per individual.

631 Using ANGSD's realSFS function, we performed a sliding window  $F_{ST}$  analysis by  
632 converting SAF output from ANGSD to a site frequency spectrum for both desert populations in  
633 each species. Detailed settings can be found in the supplementary information. We performed  $F_{ST}$   
634 outlier analysis for our species using the calculated  $F_{ST}$  values. Z-scores for  $F_{ST}$  for each species  
635 were calculated using the formula  $Z_{F_{ST}} = (\text{observed } F_{ST} - \text{mean } F_{ST}) / \text{SD } F_{ST}$ . We split the genome into  
636 two different partitions based on these z-scores:  $F_{ST}$  peaks, for values of  $F_{ST}$  greater than five  
637 standard deviations above the mean ( $z\text{-score} > 5$ ) and  $F_{ST}$  troughs for values of  $F_{ST}$  greater than five  
638 standard deviations below the mean ( $z\text{-score} < -5$ ). We only report the  $F_{ST}$  peaks in the main  
639 manuscript: for  $F_{ST}$  troughs, see the supplementary information. We performed this outlier  
640 detection for the complete, 75%, and 50% missing datasets to assess if low coverage impacted our  
641 calls.

642 Recombination rates (in crossovers per base pair, c/bp) across the genome were estimated  
643 using the program ReLERNN (Adrion et al., 2020), assuming a mutation rate of  $2.21 \times 10^{-9}$   
644 mutations per site per year (Nam et al., 2010) and a generation time of one year. This program  
645 combines simulation with a recurrent neural network to estimate the recombination rate on each  
646 chromosome in 100,000 bp windows. At present ReLERNN does not support genotype  
647 likelihoods, so we used SNPs in VCF format. We called SNPs using ANGSD with the following  
648 parameters: a p-value of 0.01; using the frequency as a prior; removing sites with a minor allele  
649 frequency below 0.05; a minimum mapping quality of 20; a minimum base quality score of 20;  
650 SNPs only called at a posterior probability greater than 0.95; minimum of four individuals with  
651 SNP.

652

### 653 *Morphological data*

654 We quantified morphological variation in our 10 focal species to assess which of the  
655 geographic models best explain morphological variation across the landscape (see *Generalized*  
656 *Dissimilarity Matrix Models*). We measured 366 specimens (19–59 per species), excluding known  
657 females and known juveniles to account for any variation attributed to sex and age. Of those, 29  
658 were also present in the genomic dataset, with 0–8 individuals per species.

659 We generated seven raw plus seven compound morphological measurements, which we  
660 designated as proxies for thermoregulation and dispersal, respectively (see Supplementary  
661 Information). We reduced the dimensionality of the 14 morphological measurements using a  
662 principal components analysis (PCA). We then calculated four distance matrices between  
663 individuals: one Euclidean distance matrix for all morphological variables, where we calculated  
664 the Euclidean distance between individuals among all raw and calculated measurements; and three  
665 Euclidean distance matrices for the first three principal components, PC1, PC2, and PC3. We  
666 assessed whether there were differences in morphological PCA space between the Sonoran and  
667 Chihuahuan Desert populations in each species using DABEST tests in the dabestr package version  
668 0.3.0 (Figure 6; Supplementary Figure 19; Supplementary Figure 20; Ho et al., 2019). Note that  
669 this method does not give explicit significance values, instead it shows whether expected  
670 confidence intervals overlap zero (i.e., no difference between deserts) or not.

671

#### 672 *Isolation across the landscape at different temporal resolutions*

673 We calculated IBD matrices by calculating the Euclidean geographic distance between the  
674 latitude/longitude pair of each specimen in R. We used the WGS84 projection for all data. These  
675 variables were somewhat correlated with one another, though less so after accounting for  
676 geographic distance (Supplementary Figure 21).

677 To produce data for the IBH model, we calculated environmental resistances in the Last  
678 Glacial Maximum (LGM; ~21,000 years ago) for each species. To do this, we created ecological  
679 niche models (ENMs) using 19 layers representing contemporary climate (WorldClim; Hijmans  
680 et al., 2005) at a resolution of 2.5 arcminutes. We used MaxEnt (Phillips et al., 2006), with  
681 ENMeval version 0.3.1 as a wrapper function for model selection (Muscarella et al., 2014).  
682 ENMeval optimizes MaxEnt models based on different sets of feature classes and regularization  
683 values (see Supplementary Information). The contemporary ENMs (see IBE section below) were  
684 then backprojected to the LGM using WorldClim paleoclimate data (Hijmans et al., 2005). We  
685 also backprojected to the Mid-Holocene, but contemporary and Mid-Holocene ENMs were highly  
686 correlated, so we excluded the Mid-Holocene values from downstream analyses. We then scaled  
687 the LGM suitability values to range between 0–1 and calculated resistances across the environment  
688 using the least cost path distance method in ResistanceGA version 4.0–14 (Peterman et al., 2014,  
689 Peterman, 2018). Regions of high resistance are predicted to reflect poor habitat and be costly to

690 traverse through. The ENMs were thresholded to equal sensitivity-specificity values for  
691 visualization (Supplementary Figure 22).

692 We approximated IBB by assigning individuals based on their location relative to the  
693 Cochise Filter Barrier (see Supplementary Information). For proximity to the Cochise Filter  
694 Barrier, we assigned individuals to either Sonoran or Chihuahuan populations either based on the  
695 results of the K=2 clustering analysis, if there was structure across longitudes, or according to a  
696 cutoff of longitude if there was no structure. We chose 108 °W longitude as our cut off—  
697 individuals west of this point were deemed Sonoran, and individuals east of this point were deemed  
698 Chihuahuan (but see Provost et al., 2021). In some cases, species with genetic breaks had some  
699 uncertainty due to unsampled areas or admixed individuals—we labeled these individuals as being  
700 unclear with respect to their desert assignment. Georeferencing on some morphological specimens  
701 was poor, but all except two specimens (see Results) were identified at least to county level if not  
702 to a specific locality. When localities were given, we georeferenced the specimens to the nearest  
703 latitude/longitude. Otherwise, we assigned individuals to the centroid of their state or county.

704 We independently tested IBE by using two datasets: contemporary environmental distance  
705 and resistance. For the environmental distances, we used the 19 WorldClim bioclimatic layers (see  
706 IBH section). For the latitude/longitude location of each specimen used in both the morphological  
707 and genomic analysis, we extracted the values on those WorldClim layers and then calculated the  
708 Euclidean distances in environmental space between specimens. This gave us an estimate of how  
709 different the environments were at each specimen's locality. For the environmental resistances, we  
710 created ENMs using the WorldClim layers, then added layers for soil properties, distance to water,  
711 terrain features, and vegetation, and occurrence data for the focal species (see Supplementary  
712 Information). We then calculated resistances and thresholded as described above.

713 To assess IBA, which had a temporal scale of the last 50 years, we obtained abundance  
714 information from the Breeding Bird Survey (Pardieck et al., 2019). This dataset consists of  
715 replicated transects where individual birds are counted across the whole of the United States. The  
716 methodology for counting is standardized and covers multiple decades of observations, with our  
717 dataset comprising data from 1966–2018. We downloaded raw data for all points, then subsetted  
718 our data to our ten focal species. We averaged the number of individuals across years (though  
719 some points only had a single year). We then interpolated across points using inverse distance  
720 weighted interpolation in the spatstat version 2.1-0 package in R (idp=5). The interpolations were



721 converted to rasters with extents and resolutions matching those of the ENMs. We then calculated  
722 resistances such that regions of high abundance had low resistance, to generate an abundance  
723 distance matrix between individuals.

724

### 725 *Generalized dissimilarity matrix models*

726 We assessed the relative effect of alternative geographic models on intraspecific variation  
727 in our focal species by building generalized dissimilarity matrix models (GDMs). As spatial layers  
728 representing our five models, we calculated geographic distances, abundance resistances,  
729 environmental distance and resistance, separation by barrier, and paleoenvironmental resistance  
730 between all individuals in each species. The models likely represent different temporal resolutions,  
731 from millions of years ago to the present-day configuration of the barrier. These predictors served  
732 as the input parameters for our GDMs and will be discussed in detail below. With our numerous  
733 response matrices (four morphological matrices, three genome matrices for each missing data  
734 cutoff, 35 matrices for chromosomes, five matrices for the lostruct partitions, and six matrices for  
735 the  $F_{ST}$  outliers with missing data cutoffs) and our six predictor matrices (with two for IBE:  
736 environmental distance, environmental resistance), we generated generalized dissimilarity matrix  
737 models using the *gdm* package version 1.3.11 in R (Manion et al., 2018). We tested which of IBA,  
738 IBB, IBD, IBE, IBH, or a combination best explained the variation in the response matrix (see  
739 below). Not all species had all chromosomes sequenced, and not all models converged: we have  
740 omitted those data. For each of the 45 response matrices per species, we built a univariate model  
741 where the genomic/chromosomal variable was predicted solely by one of the six predictor  
742 matrices. We also built models with combinations of two (bivariate) or three variables (trivariate),  
743 which we present in the Supplementary Information. Further, we present the GDM results for the  
744 chromosomes in the supplementary information. We compared the models based on the highest  
745 percent deviance explained.

746 To identify any overarching patterns with respect to which model of landscape evolution  
747 best explained genetic diversity (Supplementary Figure 23), we calculated four summary statistics  
748 for each chromosome, each lostruct and  $F_{ST}$  outlier partition, and the genome as a whole. We tested  
749 whether genomic summary statistics on each chromosome ( $F_{ST}$ ,  $D_{XY}$ , missing data, recombination  
750 rate) were correlated with explained percent deviance with an analysis of variance (ANOVA) test  
751 and a Tukey's honest significant difference test (Chambers et al., 1992, Miller, 1981, Yandell,

1997) using the stats v. 3.6.1 package in R. We did this for the complete dataset; for 75% and 50% missing data datasets, see Supplementary Information. We also calculated linear models comparing the proportion of each model to species-wide estimates of habitat suitability across the barrier. For all significance tests, we used an alpha value 0.05. However, due to multiple model testing for the GDM analyses, we applied a Bonferroni correction for simultaneous testing of six univariate models, with a final corrected alpha value of 0.0083 as our cutoff for all GDM tests (Bonferroni, 1936).

We evaluated whether the best-predictors of genomic landscapes varied across species and across partitions of the data using Chi-squared tests of significance, via the `chisq.test` function in the stats package in R. For each, the expected distributions assuming no differences between species, partitions, or structure were calculated and compared to the observed distributions. Chi-squared tests were performed both with and without Monte Carlo simulations (N=2000 simulations each repeated 1000 times).

## Acknowledgements

This work would not have been possible without generous specimen loans from DMNH (J. Woods), UWBM (R. Faucett, J. Klicka, S. Birks), UMMZ (J. Hinshaw, B. Benz), TCWC (G. Voelker), MSB (M. L. Campbell, M. Andersen, C. Witt, A. Johnson, J. McCullough), LSUMZ (D. Dittmann, F. Sheldon), CUMV (V. Rohwer, C. Dardia), AMNH (P. Sweet, P. Capainolo, B. Bird, T. Trombone). We are grateful to numerous State and Federal Collection Permit officers, and many BLM managers (T. Schnell, S. Cooke, M. McCabe, J. Atkinson, M. Daehler, S. Torrez, D. Tersey). Thanks to staff at Dalquest Desert Research Station (N. Horner) and Indio Mountains Research Station (J. Johnson). We thank M. Ingala for illustrating the birds used in many of our figures and for helpful feedback. Helpful input comes from the Smith Lab, S. Simpson, L. Musher, D. Fletcher, F. Burbrink, L. Alter, D. Kelly, I. Overcast, A. Xue, M. Hickerson, M. Blair, P. Galante, R. Harbert, E. Sterling, A. Xue, and E. Myers., the Underrepresented Genders in Museum Ornithology group, and the B. Carstens lab. We also thank two anonymous reviewers for their helpful feedback. This work was funded by the AMNH Frank M. Chapman Fund, American Ornithological Society, Society of Systematic Biologists, RGGGS Sydney Anderson Travel Award, AMNH Linda H. Gormezano Fund, and AMNH RGGGS Graduate Fellowship. BTS was supported by US NSF award DEB-1655736. KLP was supported by US NSF award DEB-2016189.

783

## 784 **Data Availability**

785       These scripts used to perform these analyses are found at  
786 [https://github.com/kaiyaprovost/GDM\\_paper/](https://github.com/kaiyaprovost/GDM_paper/). All data used to perform analyses will be available  
787 on Dryad upon publication.

788

## 789 **References**

- 790 Adrion JR, Galloway JG, Kern AD. 2020. Predicting the landscape of recombination using deep  
791 learning. *Molecular Biology and Evolution*. 37:1790-1808.
- 792 Aguillon SM, Fitzpatrick JW, Bowman R, Schoech SJ, Clark AG, Coop G, Chen N. 2017.  
793 Deconstructing isolation-by-distance: The genomic consequences of limited dispersal.  
794 *PLOS Genetics*. 13(8):e1006911.
- 795 Aguillon SM, Walsh J, Lovette, IJ. 2021. Extensive hybridization reveals multiple coloration genes  
796 underlying a complex plumage phenotype. *Proc Royal Soc B*. 288:20201805.
- 797 Arbeithuber B, Betancourt AJ, Ebner T, Tiemann-Boege I. 2015. Crossovers are associated  
798 with mutation and biased gene conversion at recombination hotspots. *Proceedings of the*  
799 *National Academy of Sciences*. 112:2109-2114.
- 800 Backstrom N, Karaiskou N, Leder EH, Gustafsson L, Primmer CR, Qvarnström A, Ellegren H.  
801 2008. A gene-based genetic linkage map of the collared flycatcher (*Ficedula albicollis*)  
802 reveals extensive synteny and gene-order conservation during 100 million years of avian  
803 evolution. *Genetics*. 179:1479-1495.
- 804 Barker FK, Burns KJ, Klicka, J., Lanyon SM, Lovette IJ. 2015. New insights into New World  
805 biogeography: An integrated view from the phylogeny of blackbirds, cardinals, sparrows,  
806 tanagers, warblers, and allies. *The Auk: Ornithological Advances*. 132:333-348.
- 807 Barrowclough GF, Groth JG, Mertz LA, Gutierrez RJ. 2005. Genetic structure, introgression, and  
808 a narrow hybrid zone between northern and California spotted owls (*Strix occidentalis*).  
809 *Molecular Ecology*. 14:1109-1120.
- 810 Barton NH, Hewitt, GM. 1981. Hybrid zones and speciation. *Evolution and Speciation*. 109-145.
- 811 Benzer S. 1961. On the topography of the genetic fine structure. *Proceedings of the National*  
812 *Academy of Sciences of the United States of America*. 47:403.

- 813 Berg PR, Jentoft S, Star B, Ring KH, Knutsen H, Lien S, Jakobsen KS, Andre C. 2015. Adaptation  
814 to low salinity promotes genomic divergence in Atlantic cod (*Gadus morhua* L.). *Genome*  
815 *Biology and Evolution*. 7:1644-1663.
- 816 Betancourt AJ, Presgraves DC. 2002. Linkage limits the power of natural selection in *Drosophila*.  
817 *Proceedings of the National Academy of Sciences*. 99:13616-13620.
- 818 Bonferroni C. 1936. Teoria statistica delle classi e calcolo delle probabilita. *Pubblicazioni del R*  
819 *Istituto Superiore di Scienze Economiche e Commerciali di Firenze*. 8:3-62.
- 820 Bourgeois Y, Ruggiero RP, Manthey JD, Boissinot S. 2019. Recent secondary contacts, linked  
821 selection, and variable recombination rates shape genomic diversity in the model species  
822 *Anolis carolinensis*. *Genome Biology and Evolution*. 11(7):2009-22.
- 823 Branch CL, Jahner JP, Kozlovsky DY, Parchman TL, Pravosudov VV. 2017. Absence of  
824 population structure across elevational gradients despite large phenotypic variation in  
825 mountain chickadees (*Poecile gambeli*). *Royal Society Open Science*. 4:170057.
- 826 Burbrink FT, Gehara M, McKelvy AD, Myers EA. 2021. Resolving spatial complexities of  
827 hybridization in the context of the gray zone of speciation in North American ratsnakes  
828 (*Pantherophis obsoletus* complex). *Evolution*. 75:260-277.
- 829 Burney CW, Brumfield RT. 2009. Ecology predicts levels of genetic differentiation in Neotropical  
830 birds. *The American Naturalist*. 174(3):358-368.
- 831 Burri R, Nater A, Kawakami T, Mugal CF, Olason PI, Smeds L, Suh A, Dutoit L, Bureš S,  
832 Garamszegi LZ, Hogner S. 2015. Linked selection and recombination rate variation drive  
833 the evolution of the genomic landscape of differentiation across the speciation continuum  
834 of *Ficedula* flycatchers. *Genome Research*. 25(11):1656-65.
- 835 Chambers JM, Freeny AE, Heiberger RM. 1992. Analysis of variance. In Chambers JM, Hastie  
836 TJ, editors. *Statistical Models in S*. Pacific Grove (CA): Wadsworth and Brooks/Cole. p.  
837 145–194.
- 838 Danecek P, Auton A, Abecasis G, Albers CA, Banks E, DePristo MA, Handsaker RE, Lunter G,  
839 Marth GT, Sherry ST, McVean, G. 2011. The variant call format and VCFtools.  
840 *Bioinformatics*. 27:2156-2158.
- 841 DePristo MA, Banks E, Poplin R, Garimella KV, Maguire JR, Hartl C, Philippakis AA, Del Angel  
842 G, Rivas MA, Hanna M, et al. 2011. A framework for variation discovery and genotyping  
843 using next-generation DNA sequencing data. *Nature Genetics*. 43:491.

- 844 Derryberry EP, Derryberry GE, Maley JM, Brumfield RT. 2014. HZAR: hybrid zone analysis  
845 using an R software package. *Molecular Ecology Resources*. 14:652-663.
- 846 Dubuc-Messier G, Réale D, Perret P, Charmantier, A. 2017. Environmental heterogeneity and  
847 population differences in blue tits personality traits. *Behavioral Ecology*. 28:448-459.
- 848 Duntsch L, Tomotani BM, de Villemereuil P, Brekke P, Lee KD, Ewen JG, Santure AW. 2020.  
849 Polygenic basis for adaptive morphological variation in a threatened Aotearoa | New  
850 Zealand bird, the hihi (*Notiomystis cincta*). *Proc Royal Soc B*. 287:20200948.
- 851 Ellegren H, Smeds L, Burri R, Olason PI, Backström N, Kawakami T, Künstner A, Mäkinen H,  
852 Nadachowska-Brzyska K, Qvarnström A, et al. 2012. The genomic landscape of species  
853 divergence in *Ficedula* flycatchers. *Nature*. 491:756-760.
- 854 Farré M, Micheletti D, Ruiz-Herrera A. 2013. Recombination rates and genomic shuffling in  
855 human and chimpanzee—a new twist in the chromosomal speciation theory. *Molecular*  
856 *Biology and Evolution*. 30(4):853-64.
- 857 Fumagalli M, Vieira FG, Linderöth T, Nielsen R. 2014. ngsTools: methods for population genetics  
858 analyses from next-generation sequencing data. *Bioinformatics*. 30:1486-1487.
- 859 Gamboa MP, Ghalambor CK, Sillett TS, Morrison SA, Funk WC. 2021. Adaptive divergence in  
860 bill morphology and other thermoregulatory traits is facilitated by restricted gene flow in  
861 song sparrows on the California Channel Islands. *Molecular Ecology*. 00:1-17.
- 862 Gibb GC, England R, Hartig G, McLenachan PA, Taylor-Smith BL, McComish BJ, Cooper A,  
863 Penny D. 2015. New Zealand passerines help clarify the diversification of major songbird  
864 lineages during the Oligocene. *Genome Biology and Evolution*. 7:2983-2995.
- 865 Grabherr MG, Russell P, Meyer M, Mauceli E, Alföldi J, Di Palma F, Lindblad-Toh K. 2010.  
866 Genome-wide synteny through highly sensitive sequence alignment: Satsuma.  
867 *Bioinformatics*. 26:1145-1151.
- 868 Haenel Q, Laurentino TG, Roesti M, Berner D. 2018. Meta-analysis of chromosome-scale  
869 crossover rate variation in eukaryotes and its significance to evolutionary genomics.  
870 *Molecular Ecology*. 27(11):2477-97.
- 871 Han F, Lamichhaney S, Grant BR, Grant PR, Andersson L, Webster MT. 2017. Gene flow, ancient  
872 polymorphism, and ecological adaptation shape the genomic landscape of divergence  
873 among Darwin's finches. *Genome Res*. 27:1004-1015.

- 874 Harris RB, Alström P, Ödeen A, Leaché AD. 2018. Discordance between genomic divergence and  
875 phenotypic variation in a rapidly evolving avian genus (*Motacilla*). *Molecular*  
876 *Phylogenetics and Evolution*. 120:183-195.
- 877 Hewitt GM. 1989. The subdivision of species by hybrid zones. In: Otte D, Endler J, editors.  
878 Speciation and its Consequences. Sunderland (MA): Sinauer Associates. p. 85-110.
- 879 Hijmans RJ, Cameron SE, Parra JL, Jones PG, Jarvis A. 2005. Very high resolution interpolated  
880 climate surfaces for global land areas. *International Journal of Climatology*. 25:1965-  
881 1978.
- 882 Ho J, Tumkaya T, Aryal S, Choi H, Claridge-Chang A. 2019. Moving beyond P values: data  
883 analysis with estimation graphics. *Nature Methods*. 16:565-566.
- 884 Hodgkinson A, Eyre-Walker A. 2011. Variation in the mutation rate across mammalian genomes.  
885 *Nature Reviews Genetics*. 12:756-766.
- 886 Holmgren CA, Norris J, and Betancourt JL. 2007. Inferences about winter temperatures and  
887 summer rains from the late Quaternary record of C4 perennial grasses and C3 desert shrubs  
888 in the northern Chihuahuan Desert. *Journal of Quaternary Science: Published for the*  
889 *Quaternary Research Association*. 22:141-161.
- 890 Holt RD. 2009. Bringing the Hutchinsonian niche into the 21st century: ecological and  
891 evolutionary perspectives. *Proceedings of the National Academy of Sciences*. 106:19659-  
892 19665.
- 893 Hooper DM, Price TD. 2017. Chromosomal inversion differences correlate with range overlap in  
894 passerine birds. *Nature Ecology Evolution*, 1:1526-1534.
- 895 Jensen-Seaman MI, Furey TS, Payseur BA, Lu Y, Roskin KM, Chen CF, Thomas MA,  
896 Haussler D, Jacob HJ. 2004. Comparative recombination rates in the rat, mouse, and human  
897 genomes. *Genome Research*. 14(4):528-38.
- 898 Johri P, Charlesworth B, Jensen JD. 2020. Toward an evolutionarily appropriate null model: jointly  
899 inferring demography and purifying selection. *Genetics*. 215(1):173-92.
- 900 Jun G, Wing MK, Abecasis GR, Kang HM. 2015. An efficient and scalable analysis framework  
901 for variant extraction and refinement from population-scale DNA sequence data. *Genome*  
902 *Res*, 25:918-925.
- 903 Kaback DB, Guacci V, Barber D, Mahon JW. 1992. Chromosome size-dependent control  
904 of meiotic recombination. *Science*. 256(5054):228-32.

- 905 Kamvar ZN, Tabima JF, Grünwald NJ. 2014. Poppr: an R package for genetic analysis of  
906 populations with clonal, partially clonal, and/or sexual reproduction. *PeerJ*. 2:e281.
- 907 Kamvar ZN, Brooks JC, Grünwald NJ. 2015. Novel R tools for analysis of genome-wide  
908 population genetic data with emphasis on clonality. *Frontiers in Genetics*. 6:208
- 909 Kawakami T, Smeds L, Backström N, Husby A, Qvarnström A, Mugal CF, Olason P,  
910 Ellegren H. 2014. A high-density linkage map enables a second-generation collared  
911 flycatcher genome assembly and reveals the patterns of avian recombination rate variation  
912 and chromosomal evolution. *Molecular Ecology*. 23(16):4035-58.
- 913 Kirkpatrick M. 2017. The evolution of genome structure by natural and sexual selection. *Journal*  
914 *of Heredity*. 108: 3-11.
- 915 Klicka LB, Kus BE, Burns KJ. 2016. Conservation genomics reveals multiple evolutionary units  
916 within Bell's Vireo (*Vireo bellii*). *Conservation Genetics*. 17:455-471.
- 917 Knief U, Schielzeth H, Backström N, Hemmrich-Stanisak G, Wittig M, Franke A, Griffith SC,  
918 Ellegren H, Kempnaers B, Forstmeier W. 2017. Association mapping of morphological  
919 traits in wild and captive zebra finches: reliable within, but not between populations.  
920 *Molecular Ecology*. 26:1285-1305.
- 921 Korneliussen TS, Albrechtsen A, Nielsen R. 2014. ANGSD: analysis of next generation  
922 sequencing data. *BMC Bioinformatics*. 15:356.
- 923 Kumar S, Stecher G, Suleski M, Hedges SB. 2017. TimeTree: a resource for timelines, timetrees,  
924 and divergence times. *Molecular Biology and Evolution*. 34:1812-1819.
- 925 Laine VN, Gossmann TI, Schachtschneider KM, Garroway CJ, Madsen O, Verhoeven KJ, De  
926 Jager V, Megens HJ, Warren WC, Minx P, et al. 2016. Evolutionary signals of selection  
927 on cognition from the great tit genome and methylome. *Nature Communications*. 7:1-9.
- 928 Langley CH, Stevens K, Cardeno C, Lee YC, Schrider DR, Pool JE, Langley SA, Suarez C,  
929 Corbett-Detig RB, Kolaczkowski B, et al. 2012. Genomic variation in natural populations  
930 of *Drosophila melanogaster*. *Genetics*. 192:533-598.
- 931 Lercher MJ, Hurst LD. 2002. Human SNP variability and mutation rate are higher in regions of  
932 high recombination. *Trends in Genetics*. 18:337-340.
- 933 Li H. 2011. A statistical framework for SNP calling, mutation discovery, association mapping and  
934 population genetical parameter estimation from sequencing data. *Bioinformatics*. 27:2987-  
935 2993.

- 936 Li H, Durbin R. 2009. Fast and accurate short read alignment with Burrows–Wheeler transform.  
937 *Bioinformatics*. 25:1754-1760.
- 938 Li H, Durbin R. 2010. Fast and accurate long-read alignment with Burrows–Wheeler transform.  
939 *Bioinformatics*. 26:589-595.
- 940 Li H, Ralph P. 2019. Local PCA shows how the effect of population structure differs along the  
941 genome. *Genetics*. 211:289-304.
- 942 Li H, Handsaker B, Wysoker A, Fennell T, Ruan J, Homer N, Marth G, Abecasis G, Durbin R.  
943 2009. The sequence alignment/map format and SAMtools. *Bioinformatics*. 25:2078-2079.
- 944 Manion G, Lisk M, Ferrier S, Nieto-Lugilde D, Mokany K, Fitzpatrick MC. 2018. gdm:  
945 Generalized dissimilarity modeling. R package version, 1(11).
- 946 Mank JE, Vicoso B, Berlin S, Charlesworth B. 2010. Effective population size and the Faster-X  
947 effect: Empirical results and their interpretation. *Evolution*. 64:663-674.
- 948 Manthey JD, Klicka J, Spellman GM. 2021. The genomic signature of allopatric speciation in a  
949 songbird is shaped by genome architecture (Aves: *Certhia americana*). *Genome Biology  
950 and Evolution*. 13(8):evab120.
- 951 Manthey JD, Moyle RG. 2015. Isolation by environment in White-breasted Nuthatches (*Sitta  
952 carolinensis*) of the Madrean Archipelago sky islands: a landscape genomics approach.  
953 *Molecular Ecology*. 24:3628-3638.
- 954 Martin SH, Jiggins CD. 2017. Interpreting the genomic landscape of introgression. *Current  
955 Opinion in Genetics & Development*. 47:69-74.
- 956 Mason NA, Burns KJ. 2013. Molecular phylogenetics of the Neotropical seedeaters and seed-  
957 finches (*Sporophila*, *Oryzoborus*, *Dolospingus*). *Ornitología Neotropical*. 24:139-155.
- 958 Mayr E. 1942. Systematics and the origin of species, from the viewpoint of a zoologist. New York:  
959 Columbia University Press.
- 960 McKenna A, Hanna M, Banks E, Sivachenko A, Cibulskis K, Kernytsky A, Garimella K, Altshuler  
961 D, Gabriel S, Daly M, et al. 2010. The Genome Analysis Toolkit: a MapReduce framework  
962 for analyzing next-generation DNA sequencing data. *Genome Res*. 20(9):1297-1303.
- 963 Meisner J, Albrechtsen A. 2018. Inferring population structure and admixture proportions in low-  
964 depth NGS data. *Genetics*. 210:719-731.
- 965 Miles LS, Rivkin LR, Johnson MT, Munshi-South J, Verrelli BC. 2019. Gene flow and genetic  
966 drift in urban environments. *Molecular Ecology*. 28:4138-4151.



- 967 Miller RG. 1981. Simultaneous Statistical Inference. New York: Springer.
- 968 Mitchell KJ, Wood JR, Llamas B, McLenachan PA, Kardailsky O, Scofield RP, Worthy TH,  
969 Cooper A. 2016. Ancient mitochondrial genomes clarify the evolutionary history of New  
970 Zealand's enigmatic acanthisittid wrens. *Molecular Phylogenetics and Evolution*. 102:295-  
971 304.
- 972 Morafka DJ. 1977. A Biogeographical Analysis of the Chihuahuan Desert through its  
973 Herpetofauna. Dordrecht: Springer.
- 974 Moreira LR, Hernández-Baños, BE, Smith BT. 2020. Spatial predictors of genomic and  
975 phenotypic variation differ in a lowland Middle American bird (*Icterus gularis*). *Molecular*  
976 *Ecology*. 29(16):3084-3101.
- 977 Muscarella R, Galante PJ, Soley-Guardia M, Boria RA, Kass JM, Uriarte M, Anderson RP. 2014.  
978 ENM eval: An R package for conducting spatially independent evaluations and estimating  
979 optimal model complexity for Maxent ecological niche models. *Methods in Ecology and*  
980 *Evolution*. 5:1198-1205.
- 981 Myers EA, Xue AT, Gehara M, Cox CL, Davis Rabosky AR, Lemos-Espinal J, Martínez-Gómez  
982 JE, Burbrink FT. 2019. Environmental heterogeneity and not vicariant biogeographic  
983 barriers generate community-wide population structure in desert-adapted snakes.  
984 *Molecular Ecology*. 28(20):4535-4548.
- 985 Normand P, Lapiere P, Tisa LS, Gogarten JP, Alloisio N, Bagnarol E, Bassi CA, Berry AM,  
986 Bickhart DM, Choisne N, et al. 2007. Genome characteristics of facultatively symbiotic  
987 *Frankia sp.* strains reflect host range and host plant biogeography. *Genome Res*. 17(1):7-  
988 15.
- 989 Nam K, Mugal C, Nabholz B, Schielzeth H, Wolf JB, Backström N, Künstner A, Balakrishnan  
990 CN, Heger A, Ponting CP, Clayton DF. 2010. Molecular evolution of genes in avian  
991 genomes. *Genome Biology*. 11(6):1-7.
- 992 Nosil P, Schluter D. 2011. The genes underlying the process of speciation. *Trends in Ecology &*  
993 *Evolution*. 26:160-167.
- 994 Nuvoloni FM, Feres RJ. F., Gilbert B. 2016. Species turnover through time: colonization and  
995 extinction dynamics across metacommunities. *The American Naturalist*. 187:786-796.

- 996 Pardieck KL, Ziolkowski Jr DJ, Lutmerding M, Aponte V, Hudson MA. R. 2019. North American  
997 Breeding Bird Survey Dataset 1966–2018, version 2018.0. US Geological Survey,  
998 Patuxent Wildlife Research Center, Laurel, MD.
- 999 Pasquet E, Barker FK, Martens J, Tillier A, Cruaud C, Cibois A. 2014. Evolution within the  
1000 nuthatches (Sittidae: Aves, Passeriformes): molecular phylogeny, biogeography, and  
1001 ecological perspectives. *Journal of Ornithology*. 155:755-765.
- 1002 Paz A, Ibáñez R, Lips KR, Crawford AJ. 2015. Testing the role of ecology and life history in  
1003 structuring genetic variation across a landscape: A trait-based phylogeographic approach.  
1004 *Molecular Ecology*. 24(14):3723-3737.
- 1005 Pessia E, Popa A, Mousset S, Rezvoy C, Duret L, Marais GA. 2012. Evidence for  
1006 widespread GC-biased gene conversion in eukaryotes. *Genome Biology and Evolution*.  
1007 4(7):675-82.
- 1008 Peterman WE. 2018. ResistanceGA: An R package for the optimization of resistance surfaces  
1009 using genetic algorithms. *Methods in Ecology and Evolution*. 9:1638-1647.
- 1010 Peterman WE, Connette GM, Semlitsch RD, Eggert LS. 2014. Ecological resistance surfaces  
1011 predict fine-scale genetic differentiation in a terrestrial woodland salamander. *Molecular*  
1012 *Ecology*. 23:2402-2413.
- 1013 Phillips OL. 1996. Long-term environmental change in tropical forests: increasing tree turnover.  
1014 *Environmental Conservation*. 23(3):235-248.
- 1015 Phillips SJ, Anderson RP, Schapire RE. 2006. Maximum entropy modeling of species geographic  
1016 distributions. *Ecological Modelling*, 190:231-259.
- 1017 Price TD, Hooper DM, Buchanan CD, Johansson US, Tietze DT, Alström P, Olsson U, Ghosh-  
1018 Harihar M, Ishtiaq F, Gupta SK, et al. 2014. Niche filling slows the diversification of  
1019 Himalayan songbirds. *Nature*. 509(7499):222-225.
- 1020 Probst CM, Ralston J, Bentley I. 2021. Effects of climate on bill morphology within and across  
1021 *Toxostoma* thrashers. *Journal of Avian Biology*.
- 1022 Provost KL, Myers EA, Smith BT. 2021. Community phylogeographic patterns reveal how a  
1023 barrier filters and structures taxa in North American warm deserts. *Journal of*  
1024 *Biogeography*. 48:1267-1283.
- 1025 R Core Team. 2019. R: a language and environment for statistical computing, version 3.0.2.  
1026 Vienna, Austria: R Foundation for Statistical Computing; 2013.

- 1027 Ralston J, FitzGerald AM, Burg TM, Starkloff NC, Warkentin IG, Kirchman JI. 2021.  
1028 Comparative phylogeographic analysis suggests a shared history among eastern North  
1029 American boreal forest birds. *The Auk* 138(3): ukab018.
- 1030 Ravinet M, Faria R, Butlin RK, Galindo J, Bierne N, Rafajlović M, Noor MAF, Mehlig B,  
1031 Westram AM. 2017. Interpreting the genomic landscape of speciation: a road map for  
1032 finding barriers to gene flow. *Journal of Evolutionary Biology*. 30(8):1450-1477.
- 1033 Relethford JH. 2004. Global patterns of isolation by distance based on genetic and morphological  
1034 data. *Human Biology*. 1:499-513.
- 1035 Reynolds J.F., Kemp P.R., Ogle K, Fernández RJ. 2004. Modifying the ‘pulse-reserve’ Paradigm  
1036 for deserts of North America: precipitation pulses, soil water, and plant responses.  
1037 *Oecologia*. 141:194-210.
- 1038 Ribeiro ÂM, Puetz L, Pattinson NB, Dalén L, Deng Y, Zhang G, da Fonseca RR, Smit B, Gilbert  
1039 MTP. 2019. 31° South: the physiology of adaptation to arid conditions in a passerine bird.  
1040 *Molecular Ecology*. 28(16):3709-3721.
- 1041 Robinson DF, Foulds LR. 1981. Comparison of phylogenetic trees. *Mathematical Biosciences*.  
1042 53:131-147.
- 1043 Rojas-Soto OR. 2003. Geographic variation of the curve-billed thrasher (*Toxostoma curvirostre*)  
1044 complex. *The Auk*. 120:311-322.
- 1045 Rojas-Soto OR, De Los Monteros AE, Zink RM. 2007. Phylogeography and patterns of  
1046 differentiation in the curve-billed thrasher. *The Condor*. 109:456-463.
- 1047 Romanov MN, Dodgson JB, Gonser RA, Tuttle, EM. 2011. Comparative BAC-based mapping in  
1048 the white-throated sparrow, a novel behavioral genomics model, using interspecies overgo  
1049 hybridization. *BMC Research Notes*. 4(1):1-13.
- 1050 Sæther SA, Sætre GP, Borge T, Wiley C, Svedin N, Andersson G,... Qvarnström A. 2007. Sex  
1051 chromosome-linked species recognition and evolution of reproductive isolation in  
1052 flycatchers. *Science*. 318:95-97.
- 1053 Sexton JP, Hangartner SB, Hoffmann AA. Genetic isolation by environment or distance:  
1054 which pattern of gene flow is most common? 2014. *Evolution*. 68(1):1-5.
- 1055 Shafer AB, Cullingham CI, Cote SD, Coltman DW. Of glaciers and refugia: a decade of study  
1056 sheds new light on the phylogeography of northwestern North America. 2010. *Molecular*  
1057 *Ecology* 19(21):4589-4621.

- 1058 Shreve F. 1942. The desert vegetation of North America. *The Botanical Review*. 8:195-246.
- 1059 Sin SYW., Lu L, Edwards SV. 2020. De Novo assembly of the northern cardinal (*Cardinalis*  
1060 *cardinalis*) genome reveals candidate regulatory regions for sexually dichromatic red  
1061 plumage coloration. *G3: Genes/Genomes/Genetics*. 10(10):3541-3548.
- 1062 Singhal S, Leffler EM, Sannareddy K, Turner I, Venn O, Hooper DM, Strand AI, Li Q, Raney B,  
1063 Balakrishnan CN, et al. 2015. Stable recombination hotspots in birds. *Science*.  
1064 350(6263):928-932.
- 1065 Skotte L., Korneliussen TS, Albrechtsen A. 2013. Estimating individual admixture proportions  
1066 from next generation sequencing data. *Genetics*. 195(3):693-702.
- 1067 Smith BT, Smith BT, Bryson Jr RW, Mauck III WM, Chaves J, Robbins MB, Aleixo A, Klicka J.  
1068 2018. Species Delimitation and Biogeography of the Gnatcatchers and Gnatwrens (Aves:  
1069 Polioptilidae). *Molecular Phylogenetics and Evolution*. 126: 45-57.
- 1070 Smith BT, Escalante P, Baños BEH, Navarro-Sigüenza AG, Rohwer S, Klicka J. 2011. The role  
1071 of historical and contemporary processes on phylogeographic structure and genetic  
1072 diversity in the Northern Cardinal, *Cardinalis cardinalis*. *BMC Evolutionary Biology*.  
1073 11:136.
- 1074 Spencer JE. 1996. Uplift of the Colorado Plateau due to lithosphere attenuation during Laramide  
1075 low-angle subduction. *Journal of Geophysical Research: Solid Earth*. 101:13595-13609.
- 1076 Teutimez MR. 2012. The cactus wren (*Campylorhynchus brunneicapillus*) in southern California:  
1077 haplotype comparisons among coastal and inland populations. Long Beach (CA):  
1078 California State University.
- 1079 Tigano A, Khan R, Omer AD, Weisz D, Dudchenko O, Multani AS, Pathak S, Behringer RR,  
1080 Aiden EL, Fisher H, MacManes MD. 2022. Chromosome size affects sequence divergence  
1081 between species through the interplay of recombination and selection. *Evolution*.  
1082 76(4):782-98.
- 1083 Toews DP, Taylor SA, Vallender R, Brelsford A, Butcher BG, Messer PW, Lovette IJ. 2016.  
1084 Plumage genes and little else distinguish the genomes of hybridizing warblers. *Current*  
1085 *Biology*. 26:2313-2318.
- 1086 Turbek SP, Browne M, Di Giacomo AS, Kopuchian C, Hochachka WM, Estalles C, Lijtmaer DA,  
1087 Tubaro PL, Silveira LF, Lovette IJ, et al. 2021. Rapid speciation via the evolution of pre-  
1088 mating isolation in the Iberá Seed-eater. *Science*. 371(6536):1312-1312.

- 1089 Van der Auwera GA, Carneiro MO, Hartl C, Poplin R, Del Angel G, Levy-Moonshine A, Jordan  
1090 T, Shakir K, Roazen D, Thibault J, et al. 2013. From FastQ data to high-confidence variant  
1091 calls: the genome analysis toolkit best practices pipeline. *Current Protocols in*  
1092 *Bioinformatics*. 43:11-10.
- 1093 Van Devender TR. 1990. Late quaternary vegetation and climate of the Sonoran Desert, United  
1094 States and Mexico. In Betancourt JL, Van Devender TR, Martin PS, editors. *Packrat*  
1095 *middens: the last 40,000 years of biotic change*. Tucson (AZ): University of Arizona Press.  
1096 p. 134-165.
- 1097 Van Devender TR, Betancourt JL, Wimberly M. 1984. Biogeographic implications of a packrat  
1098 midden sequence from the Sacramento Mountains, south-central New Mexico. *Quaternary*  
1099 *Research*. 22(3):344-360.
- 1100 Vasconcellos MM, Colli GR, Weber JN, Ortiz EM, Rodrigues MT, Cannatella DC. 2019. Isolation  
1101 by instability: Historical climate change shapes population structure and genomic  
1102 divergence of treefrogs in the Neotropical Cerrado savanna. *Molecular Ecology*.  
1103 28(7):1748-1764.
- 1104 Vázquez-Miranda H, Zink RM, Pinto BJ. 2022. Comparative phylogenomic patterns in the Baja  
1105 California avifauna, their conservation implications, and the stages in lineage divergence.  
1106 *Molecular Phylogenetics and Evolution*. 171:107466.
- 1107 Vieira FG, Lassalle F, Korneliussen TS, Fumagalli M. 2016. Improving the estimation of genetic  
1108 distances from Next-Generation Sequencing data. *Biological Journal of the Linnean*  
1109 *Society*. 117(1):139-49.
- 1110 Waldock C, Stuart-Smith RD, Albouy C, Cheung WW, Edgar GJ, Mouillot D, Tjiputra J, Pellissier  
1111 L. 2022. A quantitative review of abundance-based species distribution models.  
1112 *Ecography*. e05694.
- 1113 Wang IJ, Bradburd GS. 2014. Isolation by environment. *Molecular Ecology*. 23:5649-5662.
- 1114 Wang J, Street NR, Park EJ, Liu J, Ingvarsson PK. 2020. Evidence for widespread selection in  
1115 shaping the genomic landscape during speciation of *Populus*. *Molecular Ecology*.  
1116 29(6):1120-1136.
- 1117 Weckworth BV, Musiani M, DeCesare NJ, McDevitt AD, Hebblewhite M, Mariani S. 2013.  
1118 Preferred habitat and effective population size drive landscape genetic patterns in an  
1119 endangered species. *Proc Royal Soc B: Biological Sciences*. 280:20131756.

- 1120 Williams D, Gogarten JP, Lapierre P. 2010. Filling the gaps in the genomic landscape. *Genome*  
1121 *Biology*. 11(2):1-2.
- 1122 Wingett SW, Andrews S. 2018. FastQ Screen: A tool for multi-genome mapping and quality  
1123 control. *F1000 Research*. 7:1338.
- 1124 Wright S. 1943. Isolation by distance. *Genetics*. 28(2):114.
- 1125 Yandell BS. 1997. Practical data analysis for designed experiments. New York: Chapman &  
1126 Hall/CRC.
- 1127 Yi X, Latch EK. 2021. Nonrandom missing data can bias Principal Component Analysis inference  
1128 of population genetic structure. *Molecular Ecology Resources*. 00:1-10.
- 1129 Yusuf L, Heatley MC, Palmer JP, Barton HJ, Cooney CR, Gossmann TI. 2020. Noncoding regions  
1130 underpin avian bill shape diversification at macroevolutionary scales. *Genome Res*.  
1131 30:553-565.
- 1132 Zamudio KR, Bell RC, Mason NA. 2016. Phenotypes in phylogeography: Species' traits,  
1133 environmental variation, and vertebrate diversification. *Proceedings of the National*  
1134 *Academy of Sciences*. 113:8041-8048.
- 1135 Zhang G, Li C, Li Q, Li B, Larkin DM, Lee C, Storz JF, Antunes A, Greenwold MJ, Meredith  
1136 RW, et al. (2014). Comparative genomics reveals insights into avian genome evolution and  
1137 adaptation. *Science*. 346(6215):1311-1320.
- 1138 Zeng ZB. 1994. Precision mapping of quantitative trait loci. *Genetics*. 136(4):1457-68.
- 1139 Zink RM. 2014. Homage to Hutchinson, and the role of ecology in lineage divergence and  
1140 speciation. *Journal of Biogeography*. 41(5):999-1006.
- 1141 Zink RM, Blackwell-Rago RC. 2000. Species limits and recent population history in the Curve-  
1142 billed Thrasher. *The Condor*. 102(4):881-6.
- 1143 Zink RM, Kessen AE, Line TV, Blackwell-Rago RC. 2001. Comparative phylogeography of some  
1144 aridland bird species. *The Condor*. 103(1):1-10.
- 1145
- 1146

1147 **Tables**

1148

1149 Table 1: Chromosome-wise values for the recombination rate,  $F_{ST}$ ,  $D_{XY}$ , and proportion of missing  
1150 data per each species. Values given as mean $\pm$ standard deviation (number of chromosomes). These  
1151 are calculated by weighting all chromosome means equally; for size-weighted values see  
1152 Supplementary Table 1. Note that the number of chromosomes was based on the pseudo-  
1153 chromosomes we generated, with a maximum of 36. “Rec”=population recombination rate, or rho.  
1154 Values are given for the complete dataset; for the 50% and 75% values, see Supplementary Table  
1155 1.

| Species                                | Rec ( $\times 10^{-10}$ ) | $F_{ST}$              | $D_{XY}$               | % Missing Sites      |
|----------------------------------------|---------------------------|-----------------------|------------------------|----------------------|
| <i>Vireo bellii</i>                    | 9.7 $\pm$ 1.2 (33)        | 0.06 $\pm$ 0.09 (35)  | 0.011 $\pm$ 0.005 (31) | 0.64 $\pm$ 0.79 (36) |
| <i>Amphispiza bilineata</i>            | 11.1 $\pm$ 0.5 (35)       | 0.02 $\pm$ 0.001 (35) | 0.018 $\pm$ 0.005 (20) | 0.55 $\pm$ 0.43 (36) |
| <i>Campylorhynchus brunneicapillus</i> | 10.4 $\pm$ 0.3 (31)       | 0.03 $\pm$ 0.001 (34) | 0.011 $\pm$ 0.008 (31) | 0.55 $\pm$ 0.02 (36) |
| <i>Toxostoma crissale</i>              | 10.5 $\pm$ 0.4 (31)       | 0.04 $\pm$ 0.004 (34) | 0.01 $\pm$ 0.006 (31)  | 0.52 $\pm$ 0.41 (36) |
| <i>Toxostoma curvirostre</i>           | 10.0 $\pm$ 0.5 (34)       | 0.10 $\pm$ 0.023 (34) | 0.013 $\pm$ 0.009 (32) | 0.52 $\pm$ 0.41 (36) |
| <i>Auriparus flaviceps</i>             | 10.2 $\pm$ 0.7 (34)       | 0.05 $\pm$ 0.006 (36) | 0.015 $\pm$ 0.007 (35) | 0.56 $\pm$ 0.47 (36) |
| <i>Melospiza fusca</i>                 | 10.1 $\pm$ 0.5 (35)       | 0.04 $\pm$ 0.004 (35) | 0.015 $\pm$ 0.01 (24)  | 0.51 $\pm$ 0.47 (36) |
| <i>Poliophtila melanura</i>            | 9.7 $\pm$ 0.7 (29)        | 0.03 $\pm$ 0.001 (34) | 0.014 $\pm$ 0.01 (23)  | 0.52 $\pm$ 0.43 (36) |
| <i>Phainopepla nitens</i>              | 10.0 $\pm$ 0.6 (30)       | 0.02 $\pm$ 0.001 (34) | 0.012 $\pm$ 0.007 (28) | 0.65 $\pm$ 0.01 (36) |
| <i>Cardinalis sinuatus</i>             | 9.8 $\pm$ 0.6 (36)        | 0.03 $\pm$ 0.005 (36) | 0.015 $\pm$ 0.01 (26)  | 0.52 $\pm$ 0.35 (36) |

1156

1157

1158

1159 **Figures**

1160

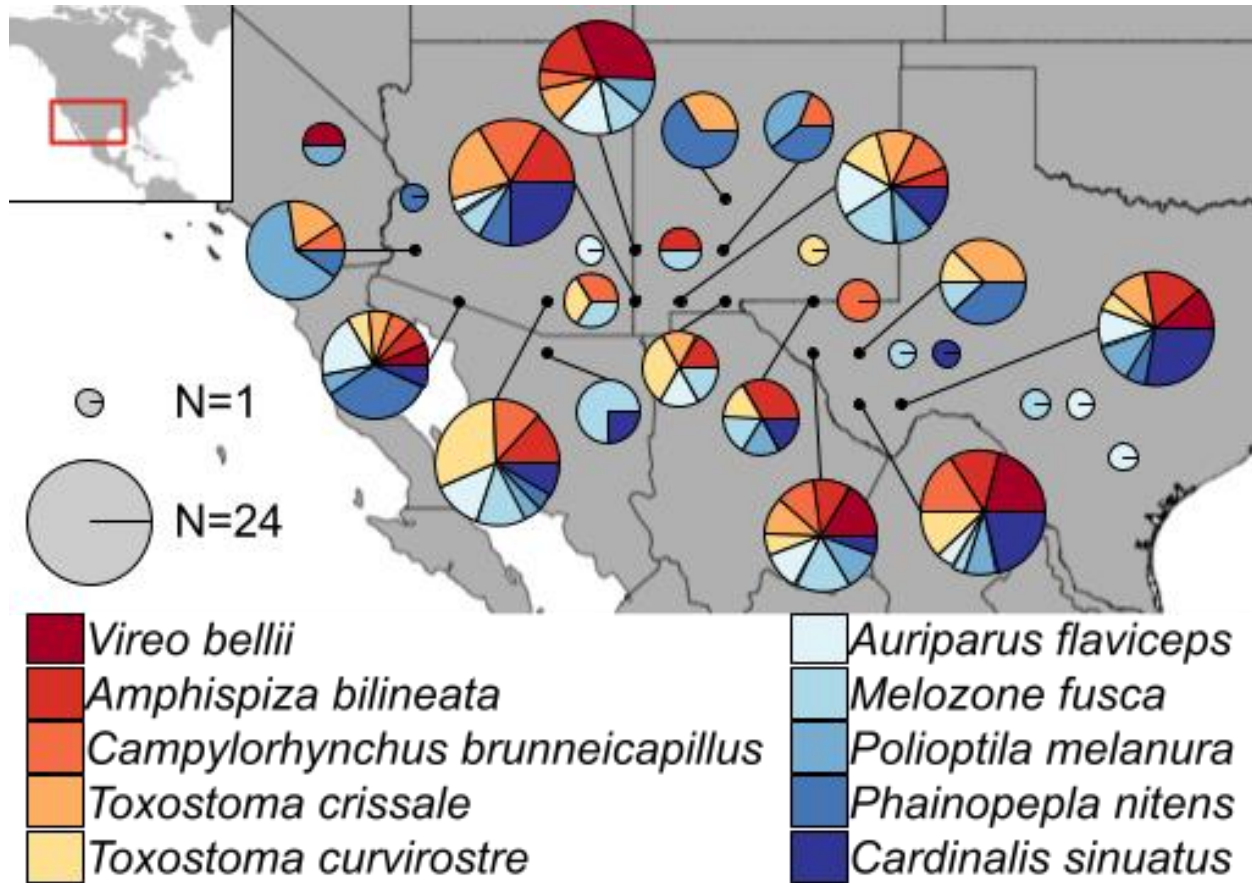

1161

1162 Figure 1: Sampling map of study across southwestern North America. Localities are given with  
1163 black points (with latitudes/longitudes of specimens rounded to nearest degree). Pie charts show  
1164 the number (radius of pie chart) and species identity (color of slices) of specimens used from that  
1165 area. Large pie charts are linked to their locality with a black line.



1166

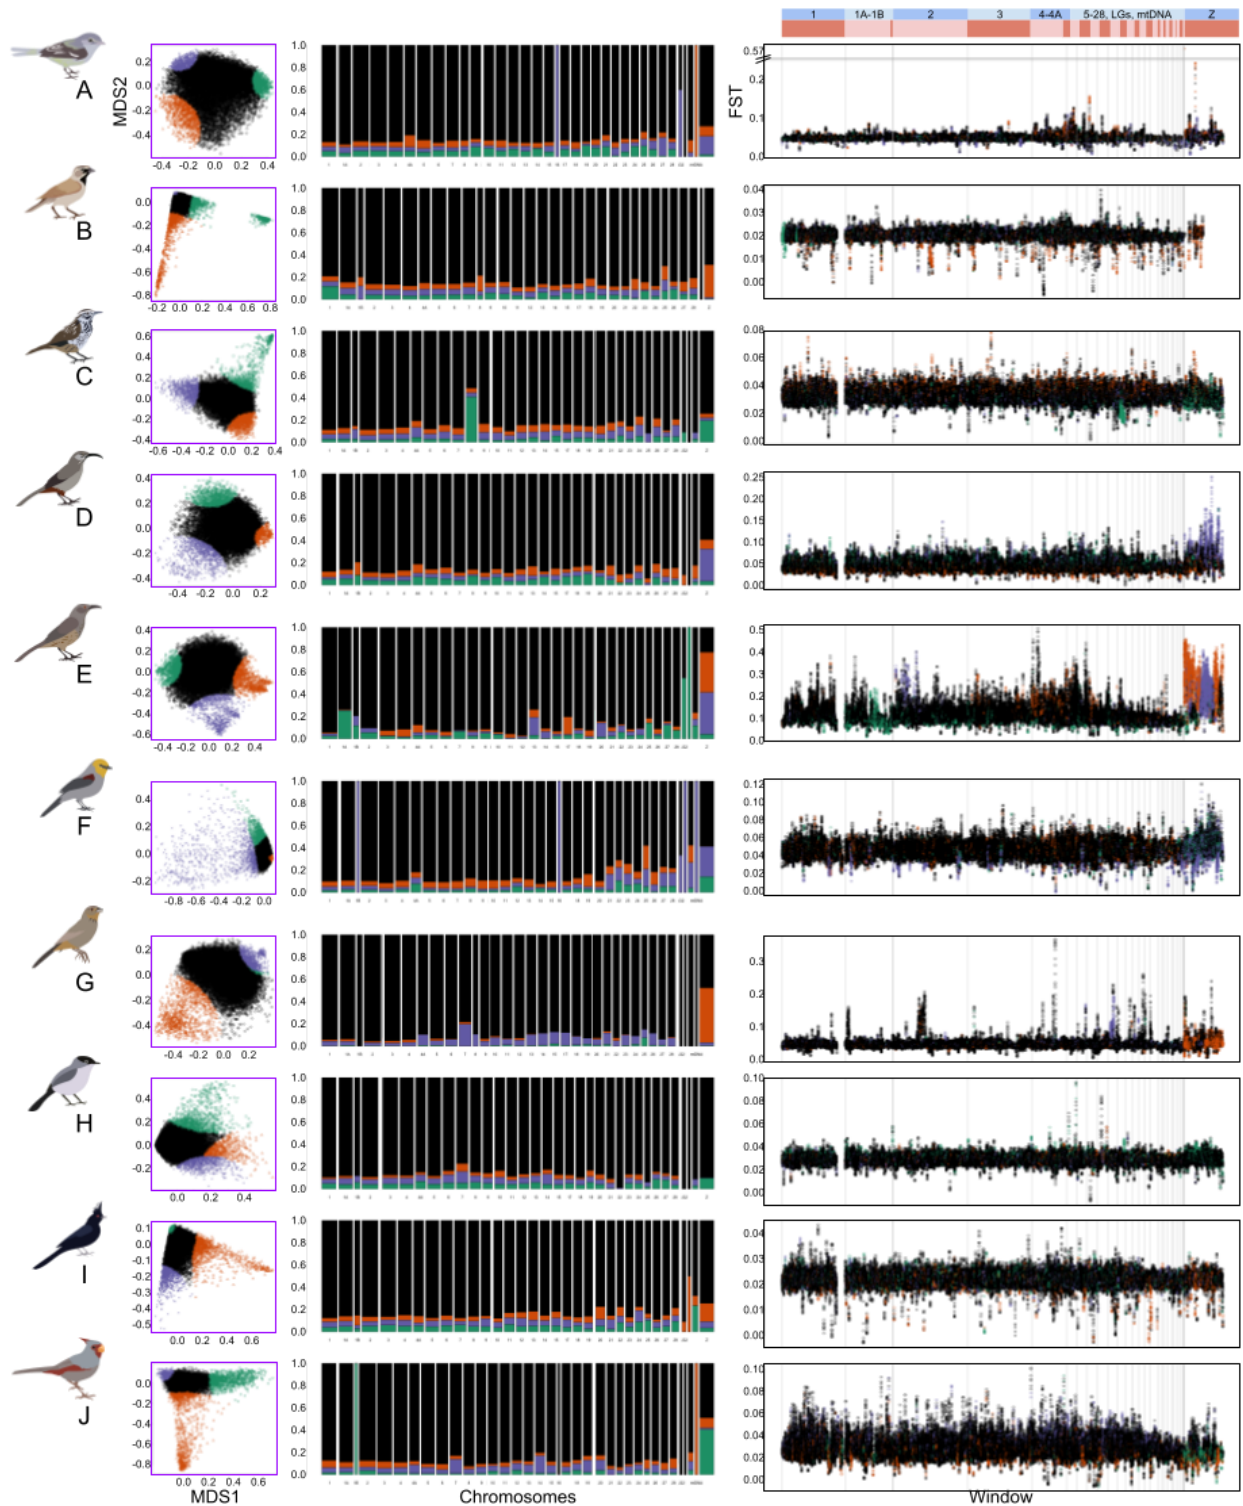

1167

1168 Figure 2: Lostruct partitions vary across species and across chromosomes. Species are as  
1169 follows: A) *Vireo bellii*, B) *Amphispiza bilineata*, C) *Campylorhynchus brunneicapillus*, D)

1170 *Toxostoma crissale*, E) *Toxostoma curvirostre*, F) *Auriparus flaviceps*, G) *Melospiza fusca*, H)  
1171 *Poliophtila melanura*, I) *Phainopepla nitens*, J) *Cardinalis sinuatus*. Left column:  
1172 Multidimensional scaling coordinate 1 (x-axis) vs 2 (y-axis) for each species, with outlier points  
1173 highlighted in orange, green, and purple as different partitions, and non-outlier points in black.  
1174 Middle column: proportion of chromosomes assigned to LS1 (orange), LS2 (green), LS3  
1175 (purple), and non-outlier (black) lostruct partitions. Width of bars approximately proportional to  
1176 length of each chromosome. Right column:  $F_{ST}$  values for windows across the genome, colored  
1177 by lostruct partition (orange, green, purple, black). Each window represents one 100,000 base  
1178 pair wide section of the genome, with subsequent windows overlapping by 10,000 base pairs.  
1179 Note that  $F_{ST}$  values are not on the same scale for all taxa. Chromosomes separated by gray lines,  
1180 with legend at the top. Species images are not to scale.  
1181  
1182  
1183  
1184

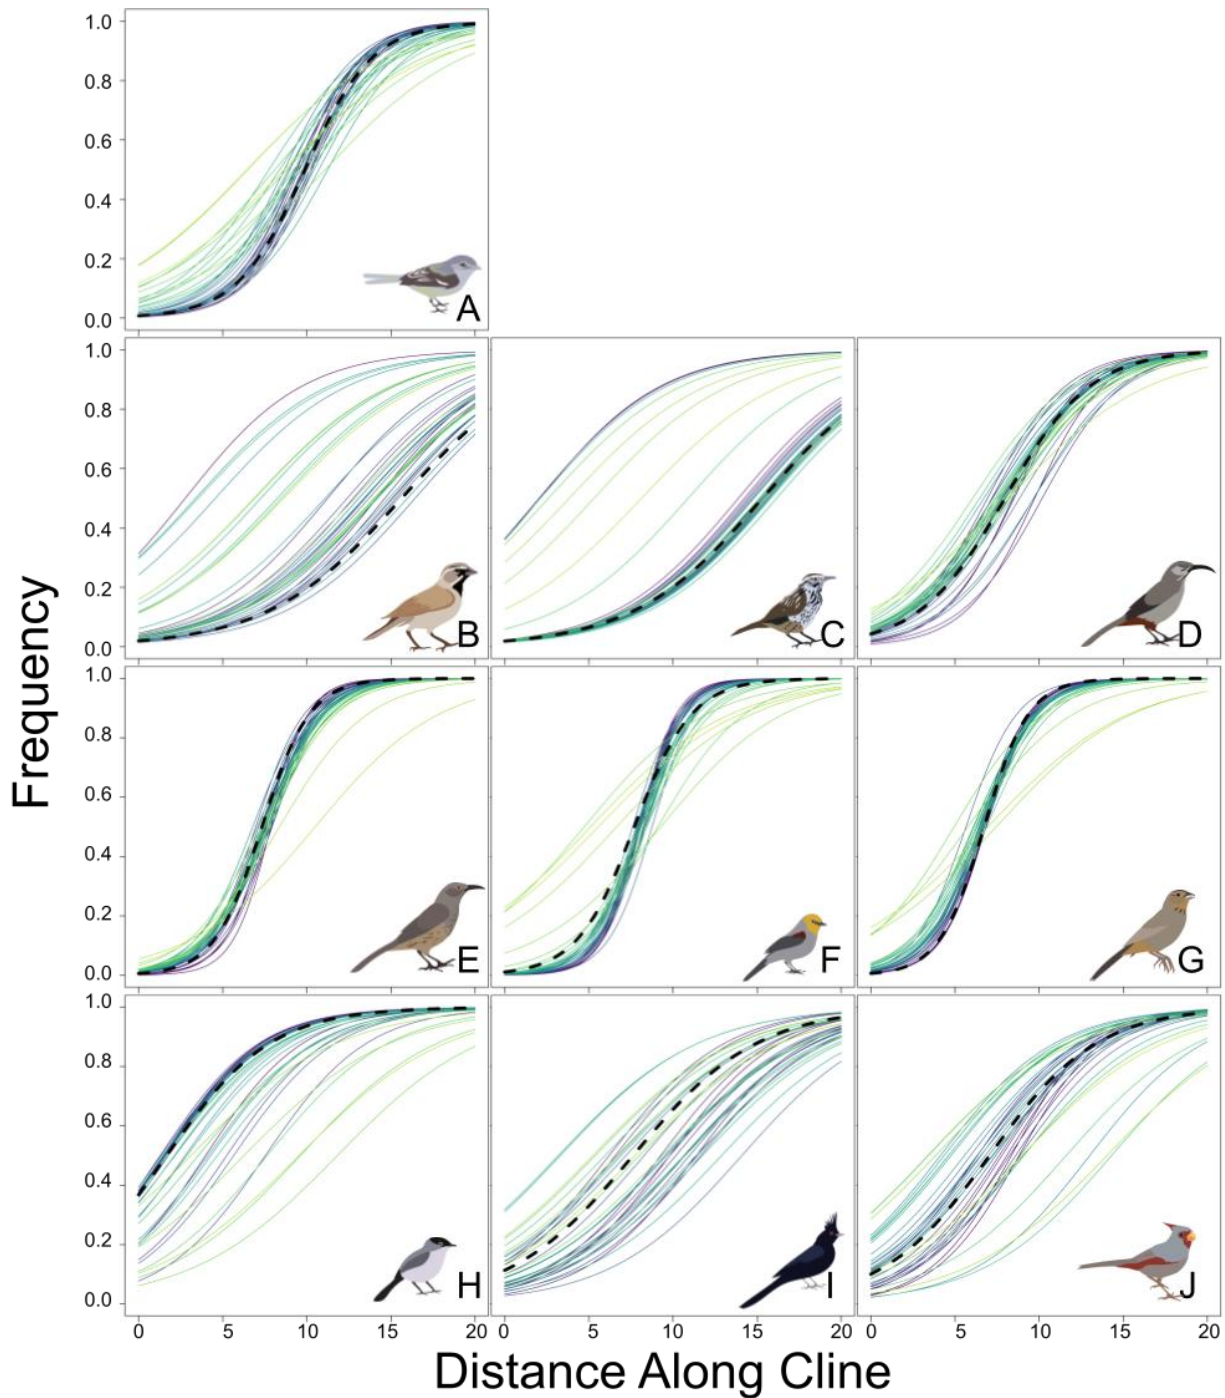

1185

1186 Figure 3: Cline width and center location vary across species and across chromosomes. X-axis  
1187 shows distance (in degrees longitude) along the sampled area. Y-axis shows the projected cline  
1188 from population assignments of 0 to 1 in each taxon (panel) and each chromosome (colored lines).  
1189 Genomes are given by thick dashed black lines. Species are as follows: A) *Vireo bellii*, B)  
1190 *Amphispiza bilineata*, C) *Campylorhynchus brunneicapillus*, D) *Toxostoma crissale*, E)

1191 *Toxostoma curvirostre*, F) *Auriparus flaviceps*, G) *Melozone fusca*, H) *Polioptila melanura*, I)

1192 *Phainopepla nitens*, J) *Cardinalis sinuatus*. Species images are not to scale.

1193

1194

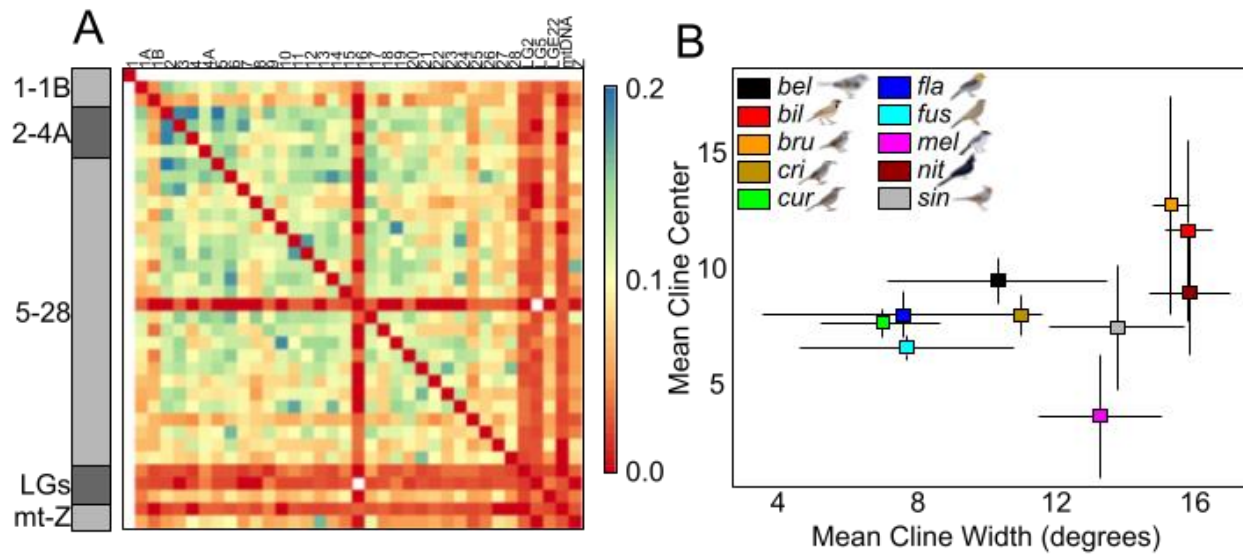

1195

1196 Figure 4. Species varied both in genetic structure across chromosomes and population structure  
1197 across the Sonoran and Chihuahuan Deserts. A) Standard deviations of normalized Robinson-  
1198 Foulds distances, averaged across species; see Supplementary Figure 4. Warmer colors indicate  
1199 lower standard deviations and less variation across taxa. Chromosomes are arranged in  
1200 alphanumeric order; y-axis shows blocks of chromosomes (gray) for legibility, x-axis shows  
1201 individual chromosomes. B) Mean cline width in degrees vs. mean cline center across  
1202 chromosomes for each species; see Figure 3. Lines from each point show standard deviations.  
1203 Species names are shortened for legibility (“bel”=*Vireo bellii*, “bil”=*Amphispiza bilineata*,  
1204 “bru”=*Campylorhynchus brunneicapillus*, “cri”=*Toxostoma crissale*, “cur”=*Toxostoma*  
1205 *curvirostre*, “fla”=*Auriparus flaviceps*, “fus”=*Melospiza fusca*, “mel”=*Poliophtila melanura*,  
1206 “nit”=*Phainopepla nitens*, “sin”=*Cardinalis sinuatus*). Colors indicate individual species.

1207

1208

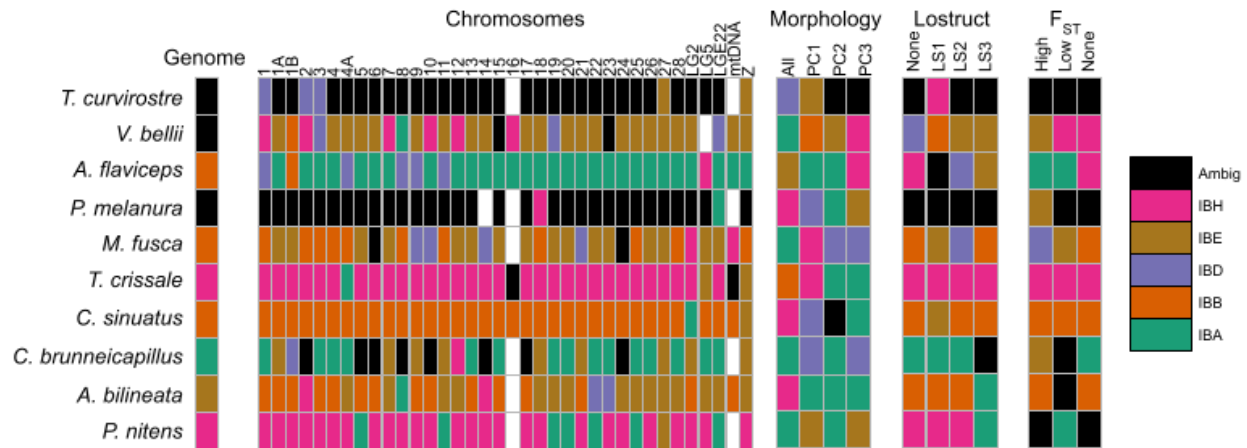

1209

1210 Figure 5: Generalized Dissimilarity Modeling revealed heterogeneous associations between  
 1211 genomic and phenotypic differentiation and alternative geographic hypothesis. Shown are the best  
 1212 performing GDM across all univariate, bivariate, and trivariate models. Species are along the y-  
 1213 axis and arranged from most to least differentiated across the Cochise Filter Barrier. Individual  
 1214 partitions are along the x-axis (whole genome, individual chromosomes, morphology, lostruct  
 1215 partitions,  $F_{ST}$  outliers). “Genome” refers to a partition where all genomic information was  
 1216 assessed at once. Color indicates the best model. The alternative models were as follows: isolation  
 1217 by abundance (IBA), isolation by barrier (IBB), isolation by distance (IBD), isolation by  
 1218 environment (IBE), and isolation by history (IBH). “Ambig” is shorthand for ambiguous partitions  
 1219 where multiple models equally best explain the data. White boxes represent models that failed to  
 1220 converge or did not have corresponding datasets. For more partitions of data see Supplementary  
 1221 Figure 2 and Supplementary Figure 11.

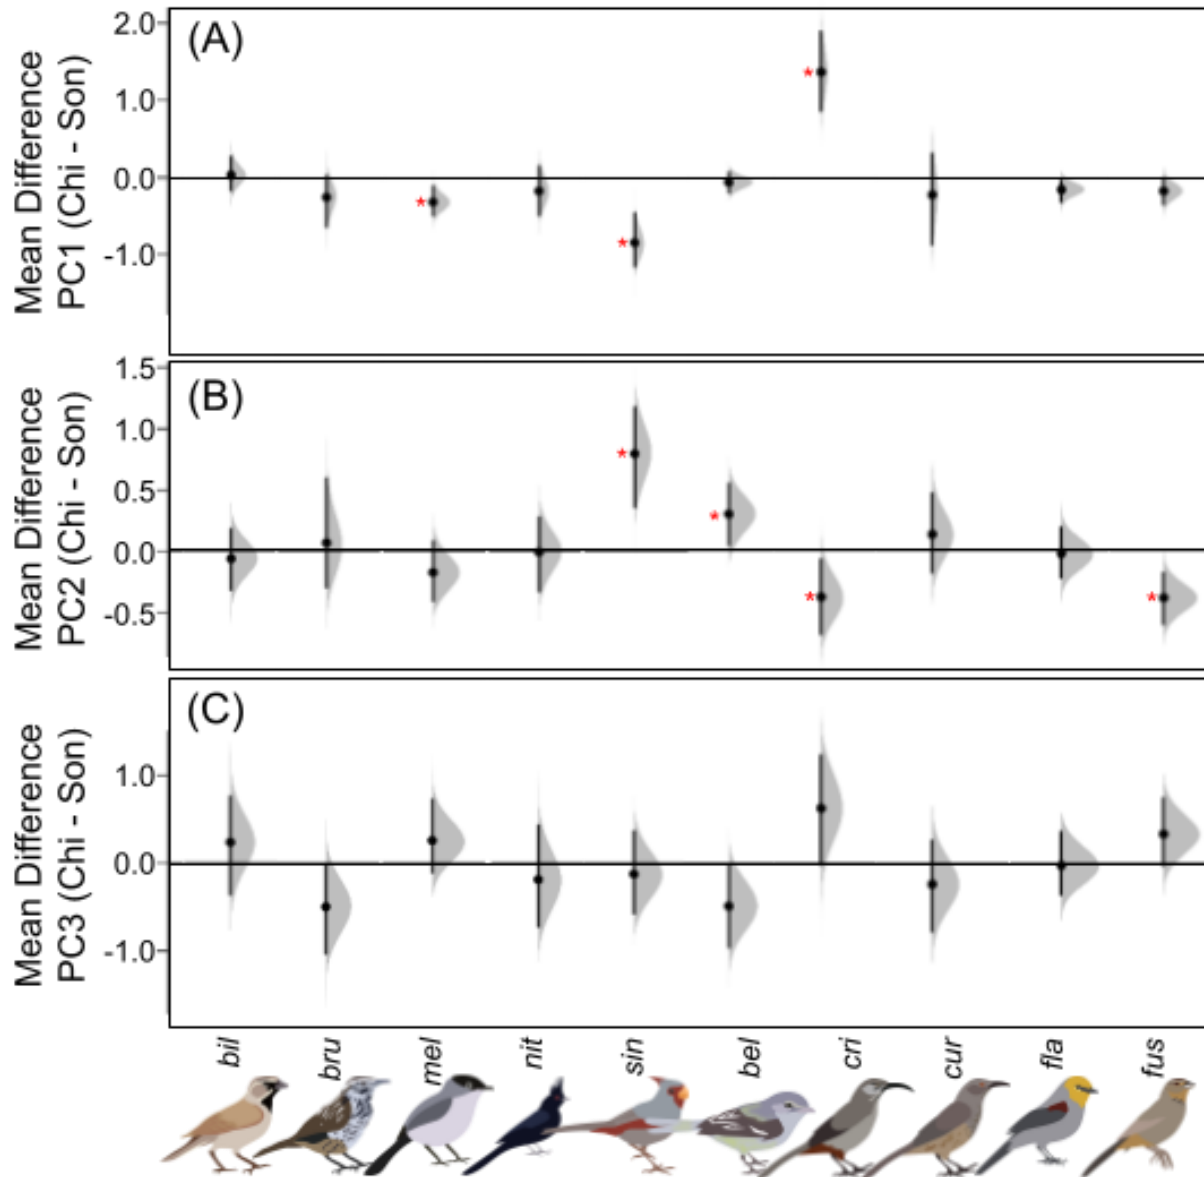

1222

1223 Figure 6: Distribution of unpaired mean differences between Sonoran and Chihuahuan Desert  
1224 individuals for each species from DABEST analysis for morphological PC1 (A), PC2 (B), and  
1225 PC3 (C). Black horizontal line is at zero, black points and vertical lines show mean and confidence  
1226 intervals for each distribution in gray. Comparisons that do not cross zero are considered  
1227 significant in DABEST tests, indicated with red asterisk. On the X axis are each species with  
1228 images (scale does not reflect size differences) with species names are shortened for legibility  
1229 (“bel”=*Vireo bellii*, “bil”=*Amphispiza bilineata*, “bru”=*Campylorhynchus brunneicapillus*,  
1230 “cri”=*Toxostoma crissale*, “cur”=*Toxostoma curvirostre*, “fla”=*Auriparus flaviceps*,

1231 “fus”=*Melospiza fusca*, “mel”=*Poliophtila melanura*, “nit”=*Phainopepla nitens*, “sin”=*Cardinalis*  
1232 *sinuatus*).
